# Supplementary material for: The Fragment-Based Development of a Benzofuran Hit as a New Class of Escherichia coli DsbA Inhibitors
Source: PubMed Central journal article supplement (PMC6832960; doi:10.3390/molecules24203756), 2019-10-18

## Fragment-based development of a benzofuran hit as a new class of *Escherichia coli* DsbA inhibitors

Luke F. Duncan<sup>1†</sup>, Geqing Wang<sup>2†</sup>, Olga V. Ilyichova<sup>3</sup>, Martin J. Scanlon<sup>3,4</sup>, Begoña Heras<sup>2</sup> and Belinda M. Abbott<sup>1\*</sup>

<sup>1</sup>Department of Chemistry and Physics, La Trobe Institute for Molecular Science, La Trobe University, Melbourne, VIC 3086, Australia

<sup>2</sup>Department of Biochemistry and Genetics, La Trobe Institute for Molecular Science, La Trobe University, Melbourne, VIC 3086, Australia

<sup>3</sup>Medicinal Chemistry, Monash Institute of Pharmaceutical Sciences, Monash University, 381 Royal Parade, Parkville, VIC 3052, Australia

<sup>4</sup>ARC Training Centre for Fragment Based Design, Monash Institute of Pharmaceutical Sciences, Monash University, 381 Royal Parade, Parkville, VIC 3052, Australia

† Both authors contributed equally to this work

\* Corresponding author

### Table of contents

|                                                                              |       |
|------------------------------------------------------------------------------|-------|
| Figure S1 Electron density maps for compounds .....                          | S3    |
| Figure S2. Co-crystal structure of <b>50</b> .....                           | S2    |
| Table S1. Data collection and refinement statistics.....                     | S4-5  |
| <sup>1</sup> H NMR and <sup>13</sup> C NMR spectra for novel compounds ..... | S6-66 |

|                      | Compound 15                                                                       | Compound 16                                                                         | Compound 21                                                                         | Compound 23                                                                         |
|----------------------|-----------------------------------------------------------------------------------|-------------------------------------------------------------------------------------|-------------------------------------------------------------------------------------|-------------------------------------------------------------------------------------|
| $2mF_o-DF_c$         | 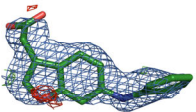 |  |  |  |
| Omit map $mF_o-DF_c$ |  |  |  |  |
|                      | Compound 25                                                                       | Compound 28                                                                         | Compound 26                                                                         |                                                                                     |
| $2mF_o-DF_c$         |  |  |  |                                                                                     |
| Omit map $mF_o-DF_c$ |  |  |  |                                                                                     |

**Figure S1.**  $\sigma_A$ -weighted  $2mF_o-DF_c$  electron density maps for compounds are contoured at  $1\sigma$  and simulated annealing omit  $\sigma_A$ -weighted  $mF_o-DF_c$  electron density maps for compounds are contoured at  $2.5\sigma$ .

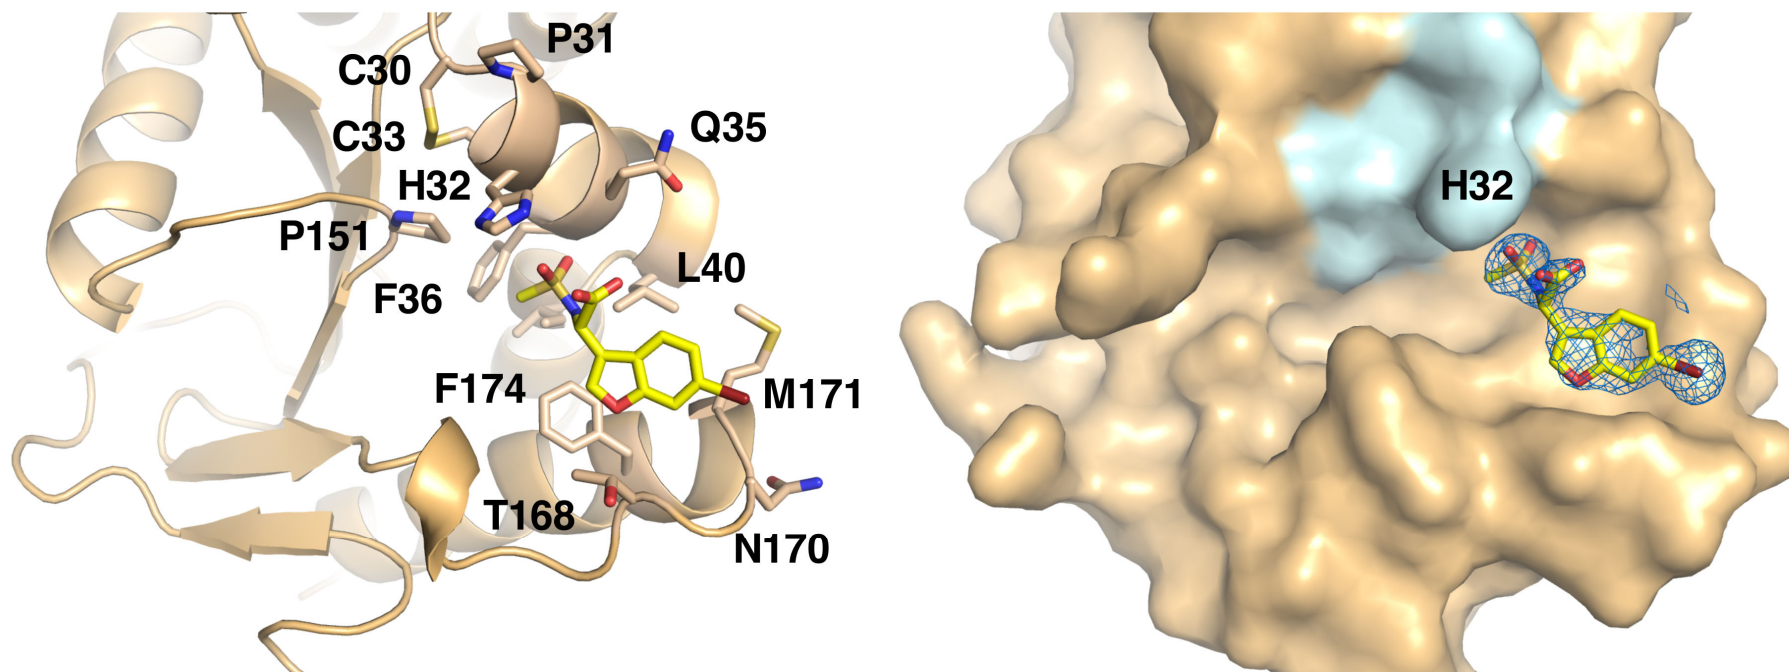

**Figure S2. Co-crystal structure of 50 ((S)-enantiomer).** Left panel: *EcDsbA* (light yellow) is presented as a cartoon. The residues within 4 Å of **50** (yellow) are shown as sticks and labelled individually. The active site residues C30-P31-H32-C33 are also shown as sticks. Right panel: Surface presentation of *EcDsbA* in the same orientation. The active site residues (C30, P31, H32, C33, V150 and P151) are shown in cyan colour.  $2mF_o-DF_c$  electron density map for **50** is contoured at  $1\sigma$  and shown as blue mesh.

**Table S1.** Data collection and refinement statistics

|                                             | Compound 15                | Compound 16               | Compound 21                | Compound 23               | Compound 26               | Compound 25                 | Compound 28               |
|---------------------------------------------|----------------------------|---------------------------|----------------------------|---------------------------|---------------------------|-----------------------------|---------------------------|
| PDB ID                                      | 6PMF                       | 6POQ                      | 6POH                       | 6PML                      | 6PVY                      | 6POI                        | 6PVZ                      |
| Wavelength                                  | 0.9537                     | 0.9537                    | 0.9537                     | 0.9537                    | 0.95366                   | 0.9537                      | 0.95370                   |
| Resolution range (Å)                        | 37.28 - 1.95 (2.02 - 1.95) | 34.97 - 1.8 (1.864 - 1.8) | 31.87 - 1.67 (1.73 - 1.67) | 34.84 - 2.0 (2.072 - 2.0) | 34.63-1.736 (1.799-1.736) | 33.37 - 1.77 (1.833 - 1.77) | 28.64-1.986 (2.057-1.986) |
| Space group                                 | C 1 2 1                    | C 1 2 1                   | C 1 2 1                    | C 1 2 1                   | C 1 2 1                   | C 1 2 1                     | C 1 2 1                   |
| Cell dimensions (Å) (a, b, c)               | 117.72 64.07 74.73         | 118.16 63.71 74.79        | 118.05 63.74 74.54         | 117.54 63.74 96.19        | 117.32, 63.90, 74.46      | 117.75 63.67 96.60          | 117.59, 63.43, 74.23      |
| Angles (°)( $\alpha$ , $\beta$ , $\gamma$ ) | 90 125.53 90               | 90 125.25 90              | 90 124.95 90               | 58149 (5330)              | 90.0, 125.8, 90.0         | 90 140.96 90                | 90.0, 125.0, 90.0         |
| Total reflections                           | 65749 (6503)               | 178012 (17713)            | 105145 (10495)             | 58149 (5330)              | 161666 (14562)            | 87194 (8620)                | 60764 (5911)              |
| Unique reflections                          | 33084 (3296)               | 42174 (4225)              | 52679 (5263)               | 29758 (2848)              | 45579 (4393)              | 43840 (4330)                | 30859 (3051)              |
| Multiplicity                                | 2.0 (2.0)                  | 4.2 (4.2)                 | 2.0 (2.0)                  | 2.0 (1.9)                 | 3.5 (3.3)                 | 2.0 (2.0)                   | 2.0 (1.9)                 |
| Completeness (%)                            | 99.73 (99.52)              | 99.98 (100.00)            | 99.92 (99.96)              | 97.62 (94.12)             | 98.66 (95.54)             | 99.72 (99.79)               | 99.39 (98.67)             |
| $\langle I/\sigma I \rangle$                | 12.80 (2.06)               | 21.67 (2.24)              | 14.27 (2.25)               | 9.27 (1.72)               | 9.69 (1.18)               | 14.08 (2.17)                | 16.13 (4.34)              |
| Wilson B-factor                             | 29.54                      | 29.18                     | 19.21                      | 25.68                     | 33.26                     | 20.85                       | 20.76                     |
| R <sub>merge</sub>                          | 0.03437 (0.3369)           | 0.08923 (0.6813)          | 0.03339 (0.3625)           | 0.05591 (0.4229)          | 0.0632 (0.5206)           | 0.03635 (0.3825)            | 0.0281 (0.1683)           |
| R <sub>meas</sub>                           | 0.04861 (0.4764)           | 0.1023 (0.7823)           | 0.04723 (0.5127)           | 0.07907 (0.598)           | 0.07375 (0.6214)          | 0.05141 (0.5409)            | 0.03974 (0.238)           |
| R <sub>pim</sub>                            | 0.03437 (0.3369)           | 0.04974 (0.381)           | 0.03339 (0.3625)           | 0.05591 (0.4229)          | 0.03747 (0.3344)          | 0.03635 (0.3825)            | 0.0281 (0.1683)           |
| CC <sub>1/2</sub>                           | 0.998 (0.88)               | 0.994 (0.79)              | 0.999 (0.742)              | 0.996 (0.662)             | 0.995 (0.825)             | 0.999 (0.725)               | 0.999 (0.92)              |
| CC*                                         | 1 (0.968)                  | 0.999 (0.94)              | 1 (0.923)                  | 0.999 (0.893)             | 0.999 (0.951)             | 1 (0.917)                   | 1 (0.979)                 |
| Reflections used in refinement              | 33049 (3285)               | 42173 (4225)              | 52674 (5263)               | 29757 (2849)              | 45559 (4391)              | 43839 (4330)                | 30858 (3051)              |
| Reflections used for R <sub>free</sub>      | 1652 (177)                 | 2187 (198)                | 2588 (240)                 | 1618 (142)                | 2418 (209)                | 2198 (209)                  | 1570 (190)                |
| R <sub>work</sub>                           | 0.1909 (0.3027)            | 0.1638 (0.2665)           | 0.1652 (0.2625)            | 0.1824 (0.2583)           | 0.1925 (0.2954)           | 0.1695 (0.2474)             | 0.1663 (0.1972)           |
| R <sub>free</sub>                           | 0.2258 (0.3505)            | 0.2011 (0.3178)           | 0.1909 (0.3026)            | 0.2197 (0.3028)           | 0.2256 (0.3448)           | 0.2064 (0.2871)             | 0.2004 (0.2671)           |
| CC(work)                                    | 0.965 (0.886)              | 0.949 (0.730)             | 0.969 (0.885)              | 0.963 (0.824)             | 0.957 (0.874)             | 0.964 (0.873)               | 0.963 (0.919)             |
| CC(free)                                    | 0.956 (0.853)              | 0.946 (0.507)             | 0.959 (0.787)              | 0.934 (0.764)             | 0.940 (0.788)             | 0.961 (0.799)               | 0.952 (0.869)             |
| Number of non-hydrogen atoms                | 3187                       | 3388                      | 3510                       | 3301                      | 3177                      | 3377                        | 3269                      |
| macromolecules                              | 2899                       | 2931                      | 2970                       | 2922                      | 2873                      | 2940                        | 2896                      |
| ligands                                     | 21                         | 23                        | 19                         | 29                        | 36                        | 21                          | 21                        |
| solvent                                     | 267                        | 434                       | 521                        | 350                       | 268                       | 416                         | 352                       |
| Protein residues                            | 376                        | 376                       | 376                        | 376                       | 376                       | 376                         | 376                       |
| RMS(bonds)                                  | 0.004                      | 0.01                      | 0.006                      | 0.003                     | 0.004                     | 0.012                       | 0.004                     |
| RMS(angles)                                 | 0.58                       | 0.82                      | 0.75                       | 0.53                      | 0.58                      | 0.95                        | 0.58                      |
| Ramachandran favored (%)                    | 97.85                      | 98.39                     | 98.12                      | 97.85                     | 97.31                     | 97.85                       | 98.66                     |
| Ramachandran allowed (%)                    | 2.15                       | 1.61                      | 1.88                       | 1.88                      | 2.69                      | 2.15                        | 1.34                      |
| Ramachandran outliers (%)                   | 0.00                       | 0                         | 0                          | 0.27                      | 0.00                      | 0                           | 0.00                      |
| Rotamer outliers (%)                        | 0.00                       | 0                         | 0                          | 1                         | 0.34                      | 0.66                        | 1.00                      |

|                  |       |       |       |       |       |       |       |
|------------------|-------|-------|-------|-------|-------|-------|-------|
| Clashscore       | 1.77  | 1.74  | 1.37  | 2.09  | 3.71  | 2.08  | 3.52  |
| Average B-factor | 42.81 | 36.19 | 27.52 | 34.29 | 46.87 | 27.53 | 26.72 |
| macromolecules   | 42.44 | 34.78 | 25.44 | 33.2  | 46.15 | 26.28 | 25.81 |
| ligands          | 62.56 | 60.46 | 51.51 | 63.86 | 84.36 | 36.74 | 30.74 |
| solvent          | 45.26 | 44.42 | 38.53 | 40.88 | 49.64 | 35.92 | 33.97 |

<sup>1</sup>H-NMR (400 MHz, CDCl<sub>3</sub>) of 4-(Chloromethyl)-7-iodo-2H-chromen-2-one, 3

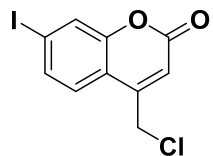

7.76  
7.68  
7.66  
7.38  
7.36  
7.26  
6.59

4.63

1.63

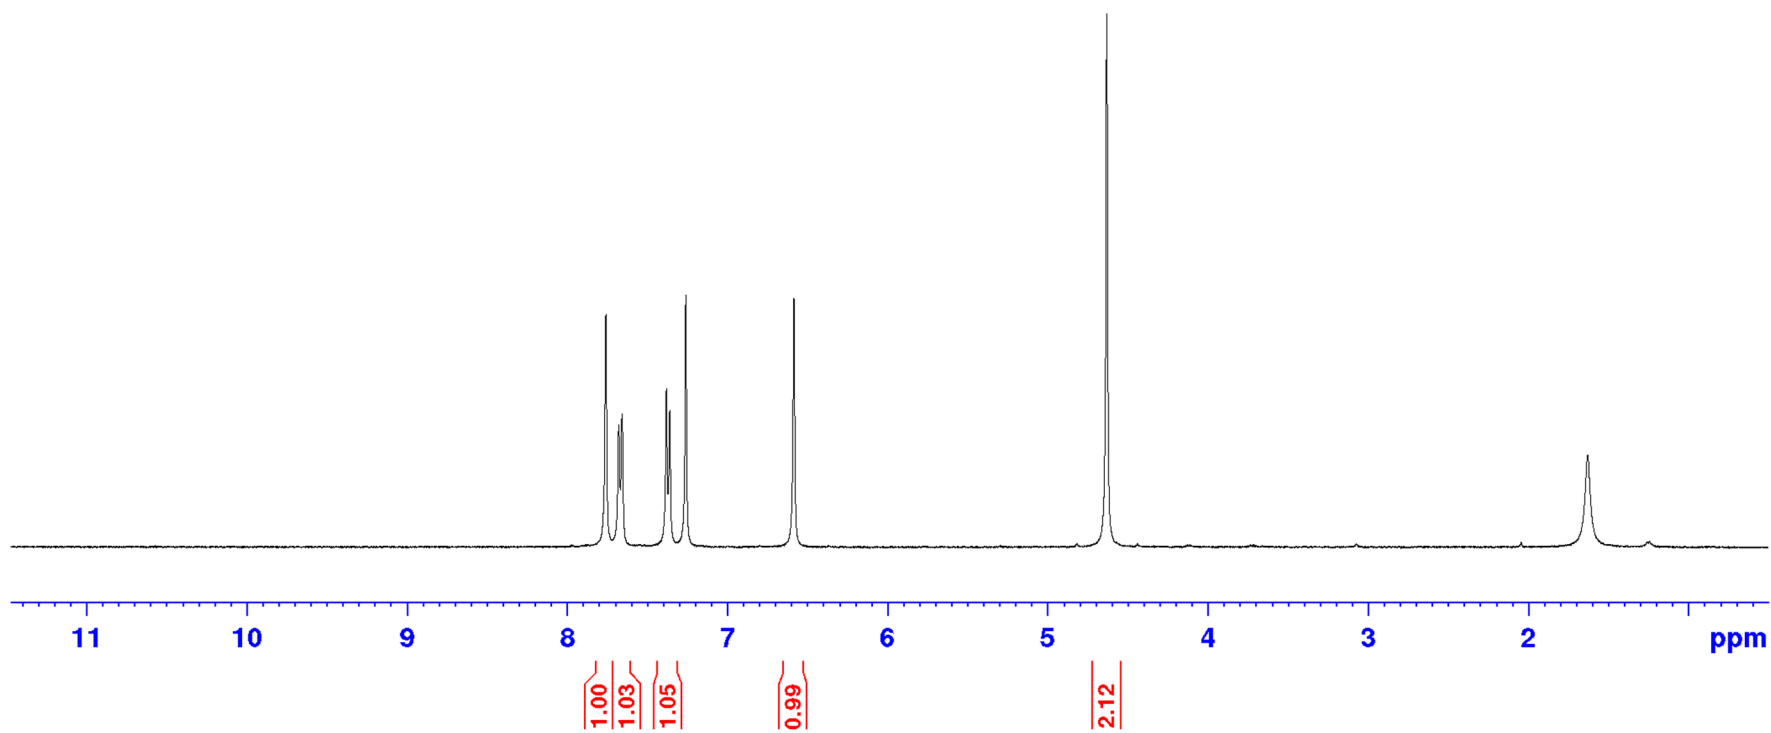

<sup>13</sup>C-NMR (100 MHz, CDCl<sub>3</sub>) of 4-(Chloromethyl)-7-iodo-2H-chromen-2-one, 3

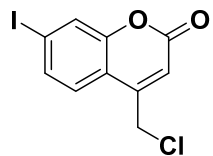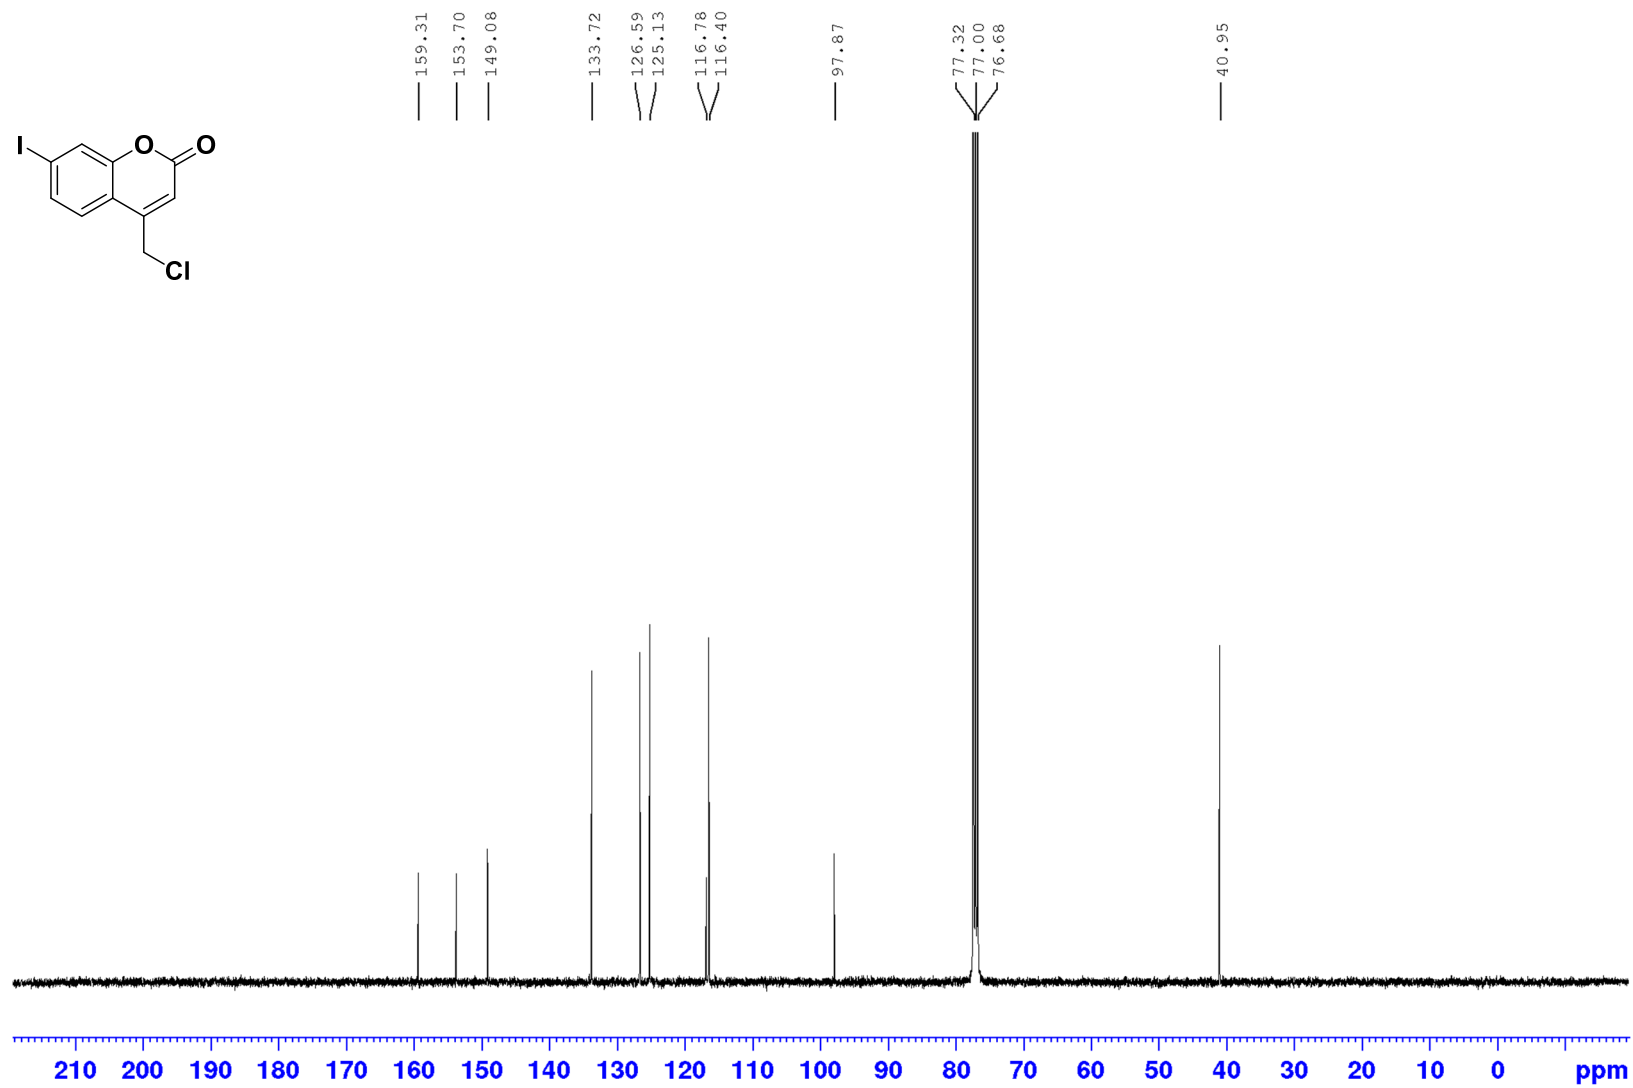

<sup>1</sup>H-NMR (400 MHz, CDCl<sub>3</sub>) of 2-(6-Iodobenzofuran-3-yl)acetic acid, 8

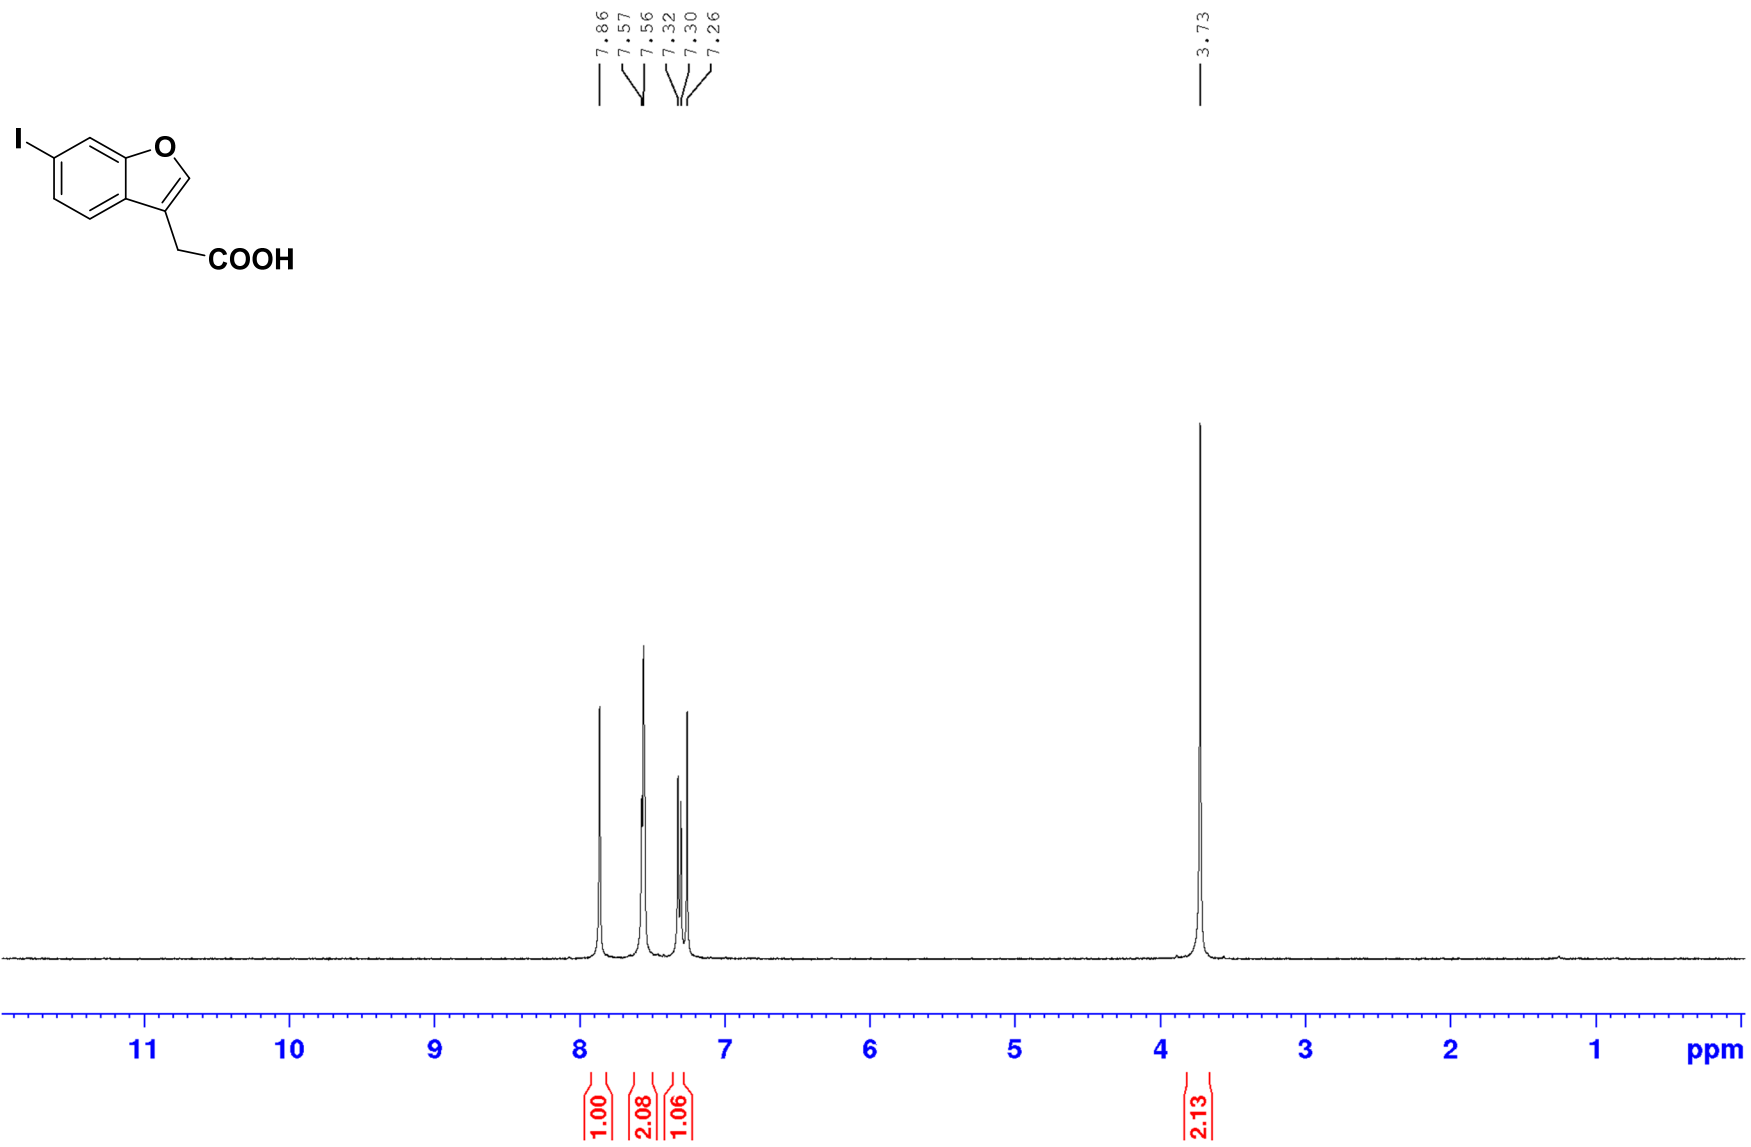



<sup>13</sup>C-NMR (100 MHz, DMSO-*d*<sub>6</sub>) of 2-(6-Iodobenzofuran-3-yl)acetic acid, **8**

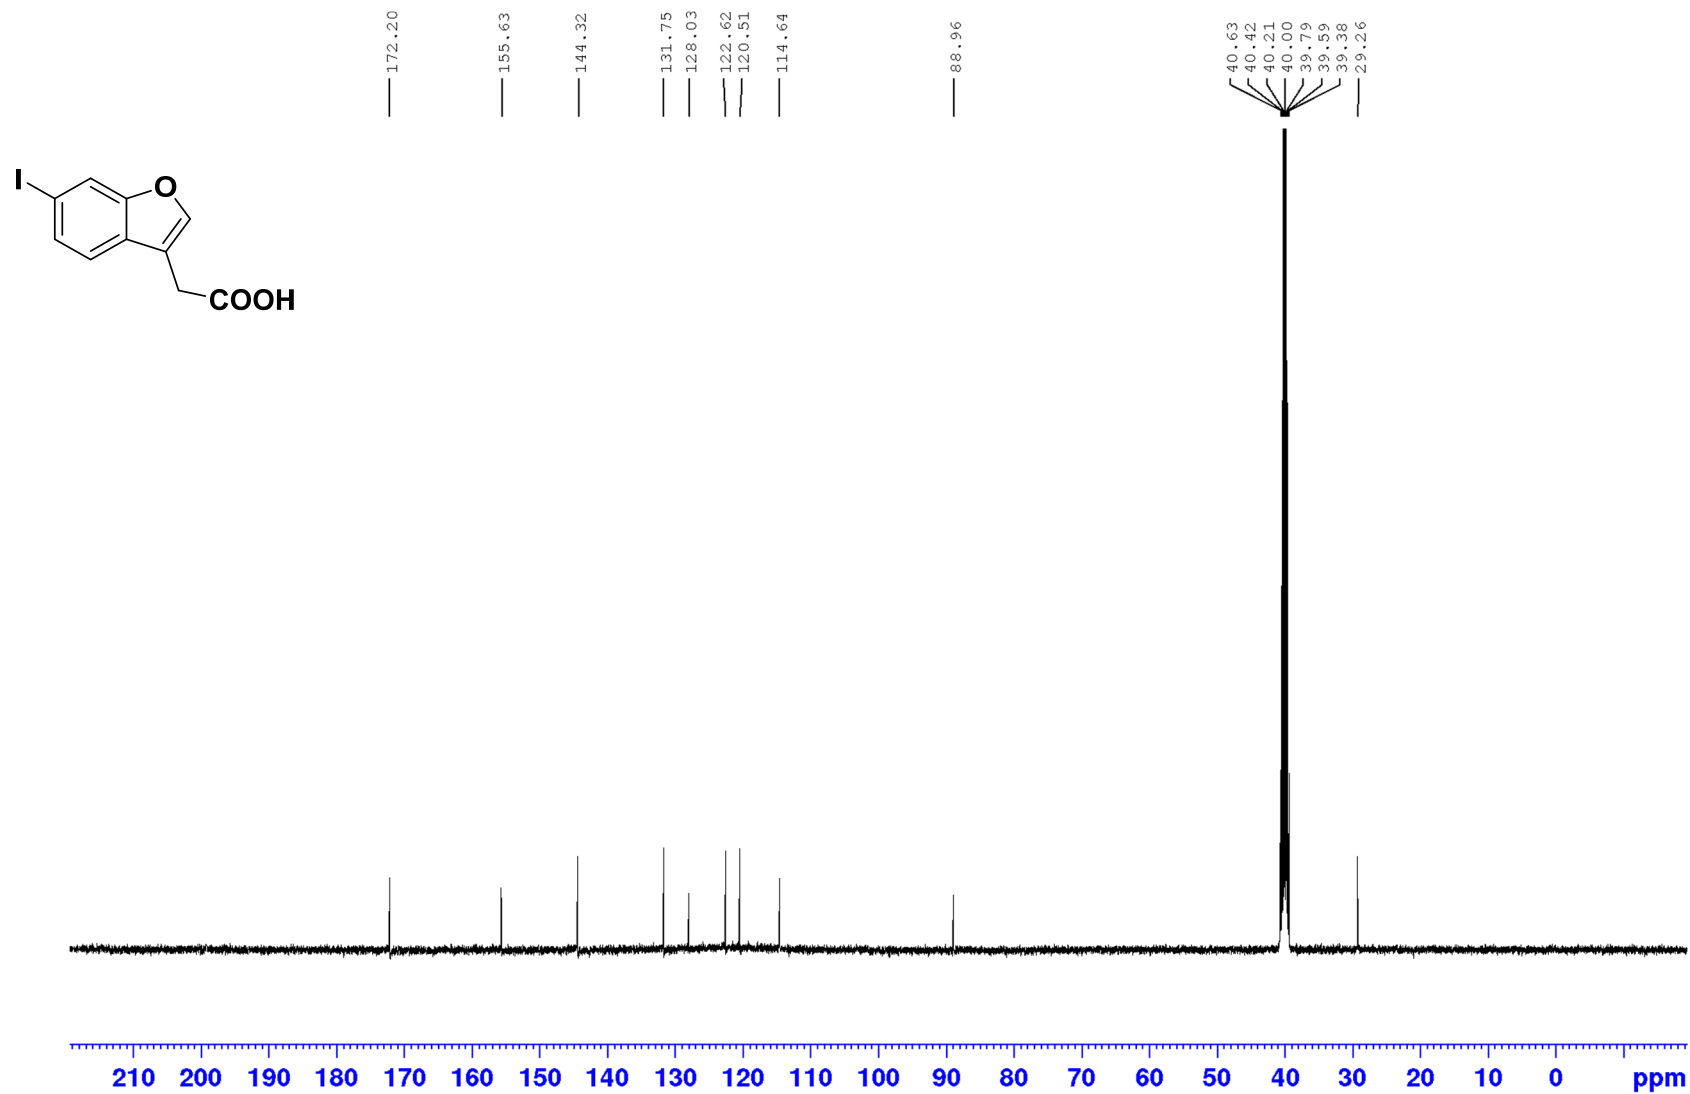

<sup>1</sup>H-NMR (400 MHz, CDCl<sub>3</sub>) Methyl 2-(6-bromobenzofuran-3-yl)acetate, 11

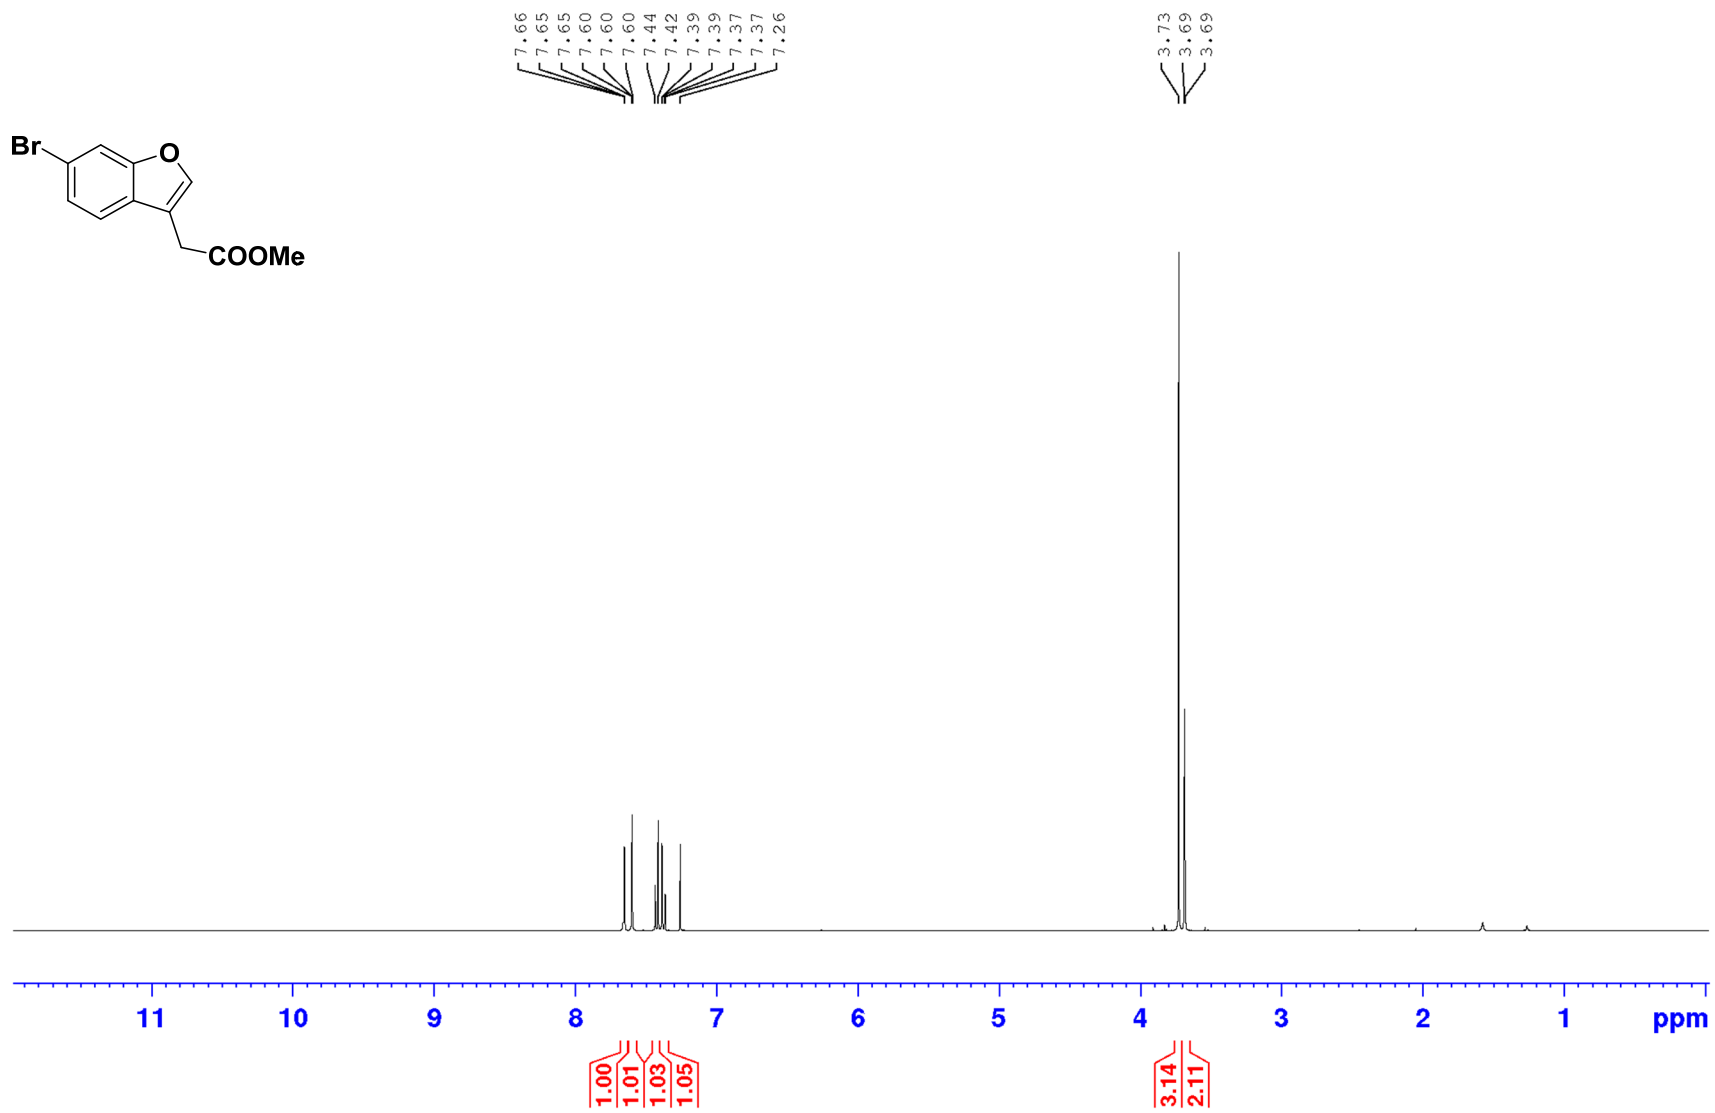

<sup>13</sup>C-NMR (100 MHz, CDCl<sub>3</sub>) of Methyl 2-(6-bromobenzofuran-3-yl)acetate, **11**

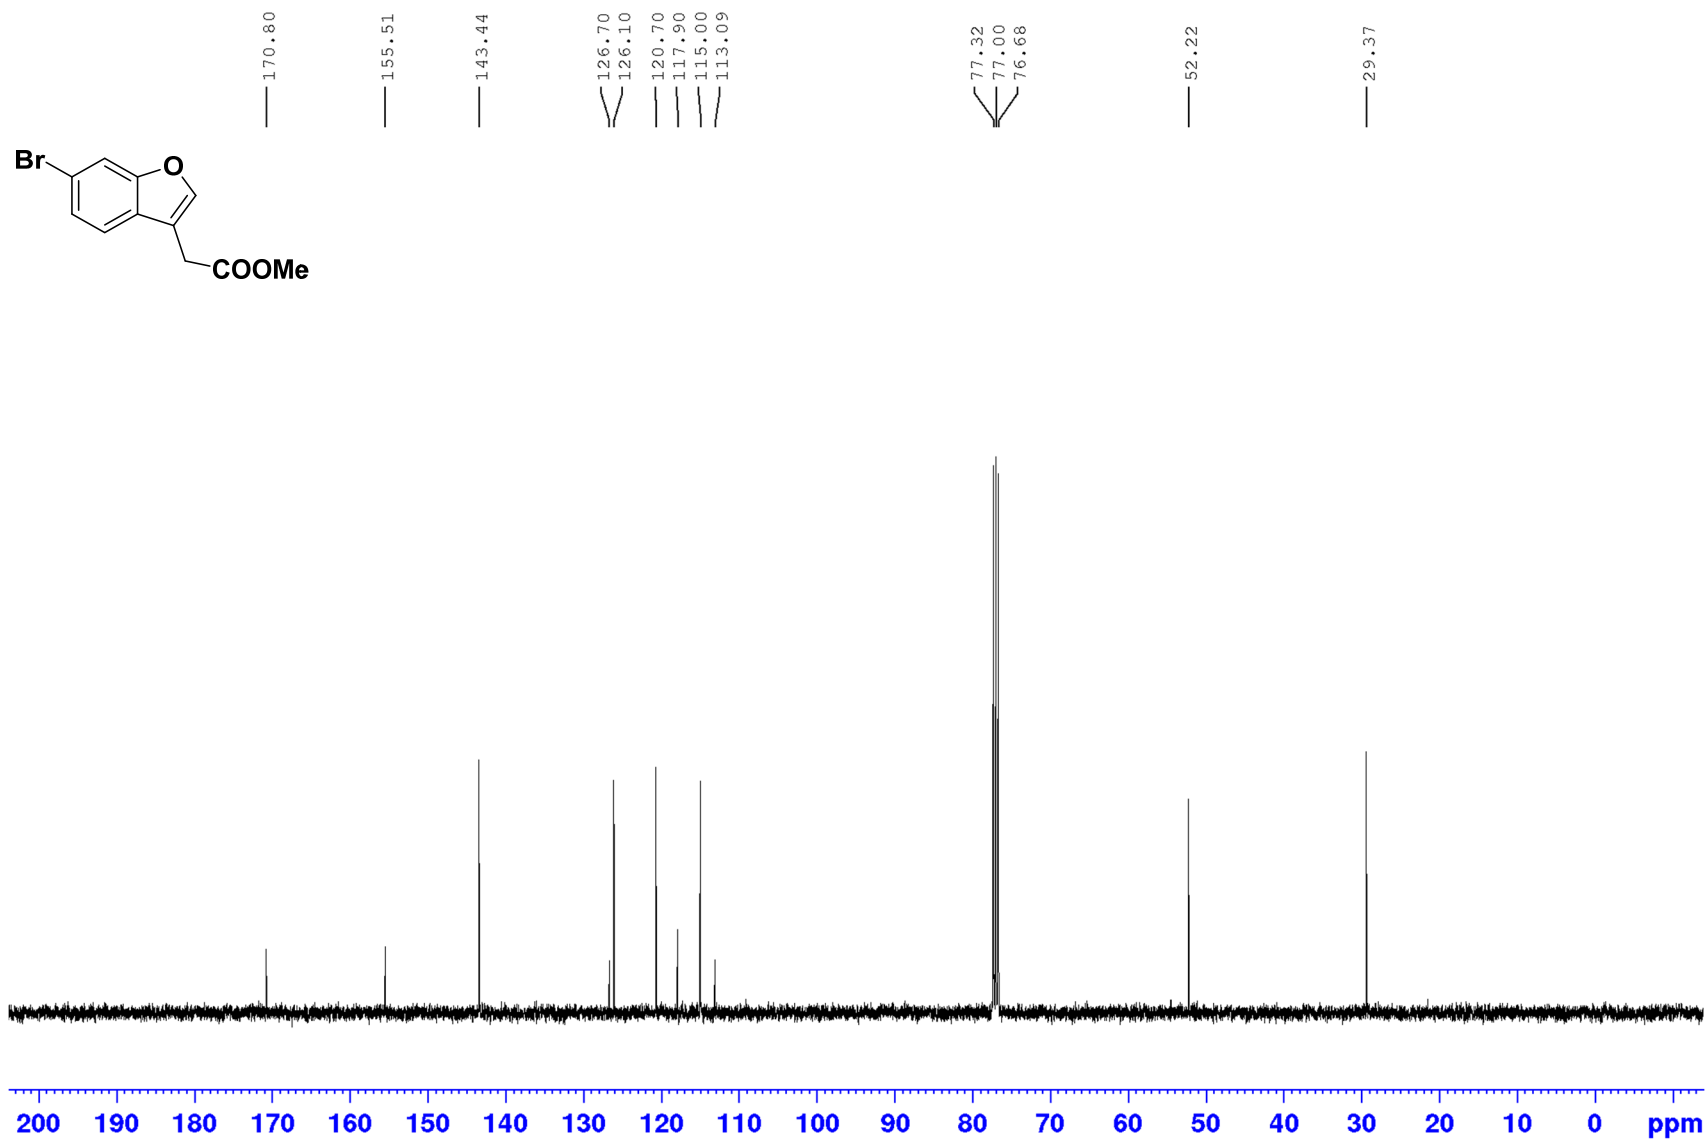

<sup>1</sup>H-NMR (400 MHz, CDCl<sub>3</sub>) of **Methyl 2-(6-Iodobenzofuran-3-yl)acetate, 12**

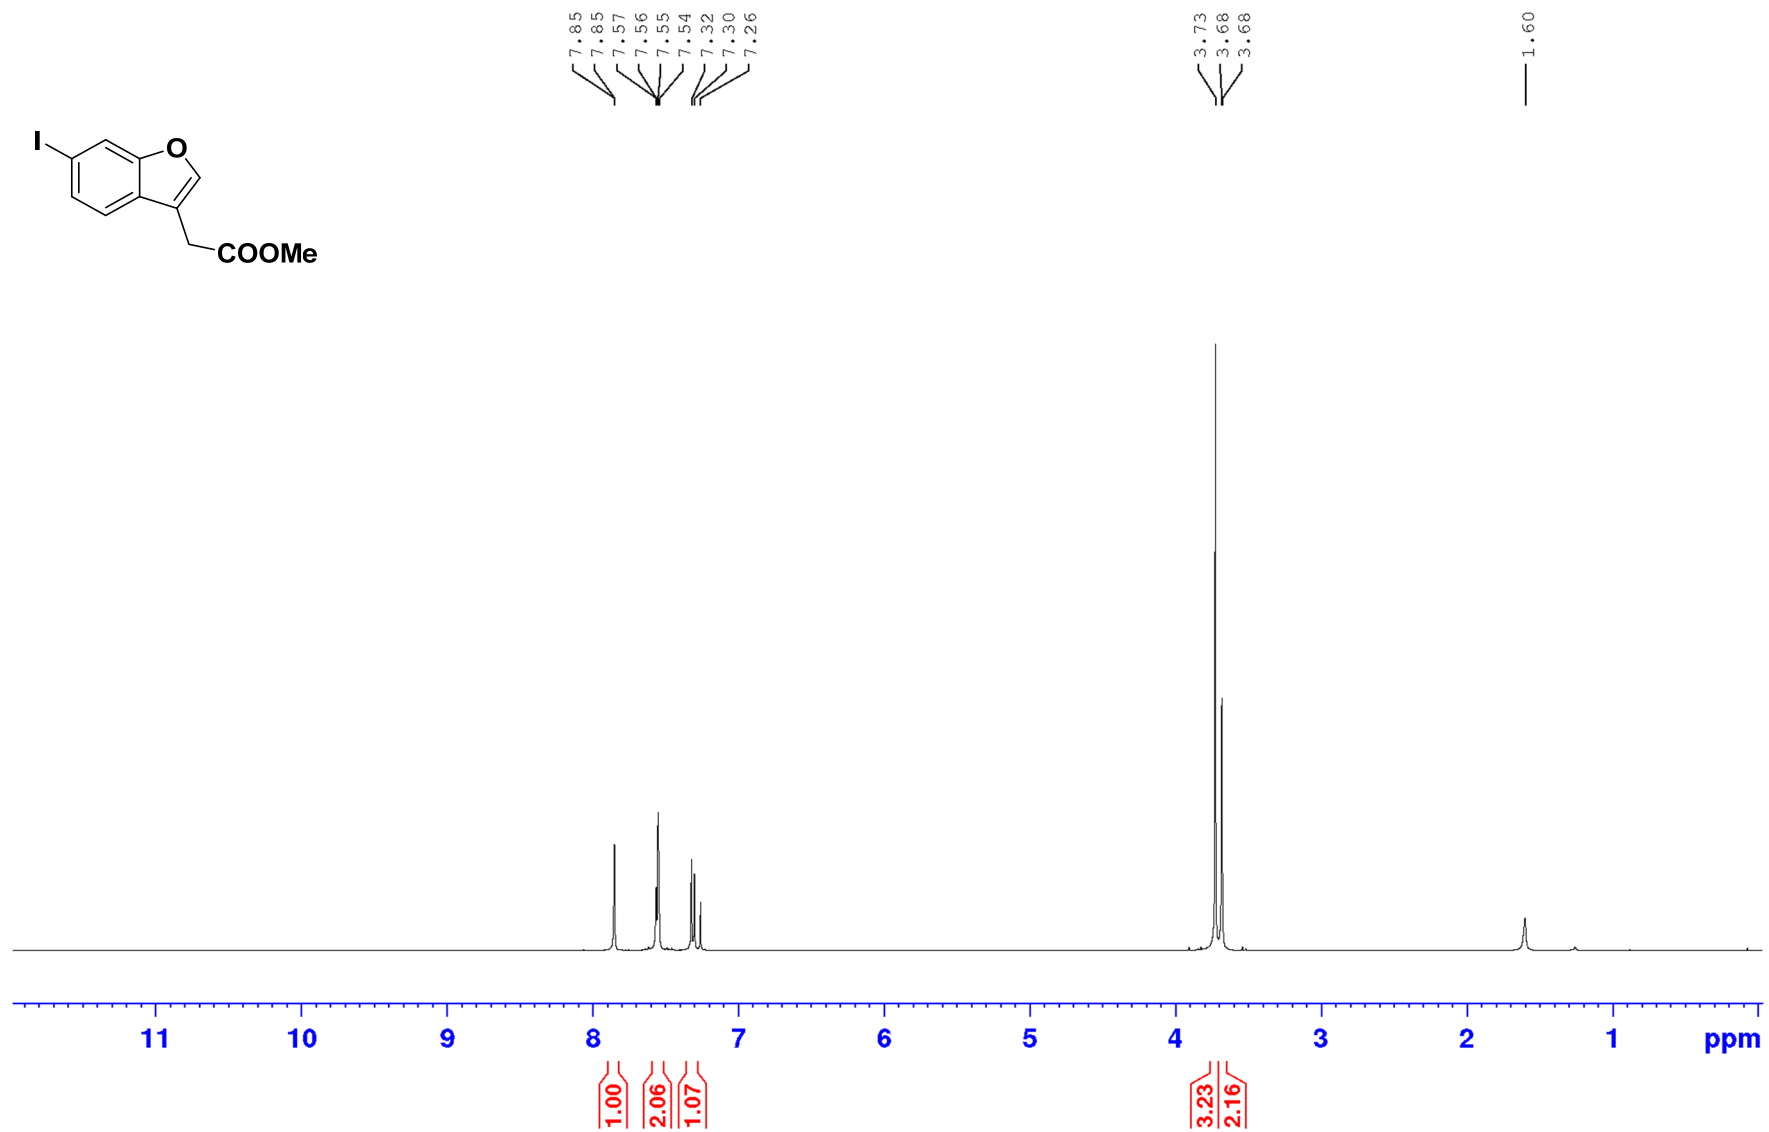

<sup>13</sup>C-NMR (100 MHz, CDCl<sub>3</sub>) of **Methyl 2-(6-Iodobenzofuran-3-yl)acetate, 12**

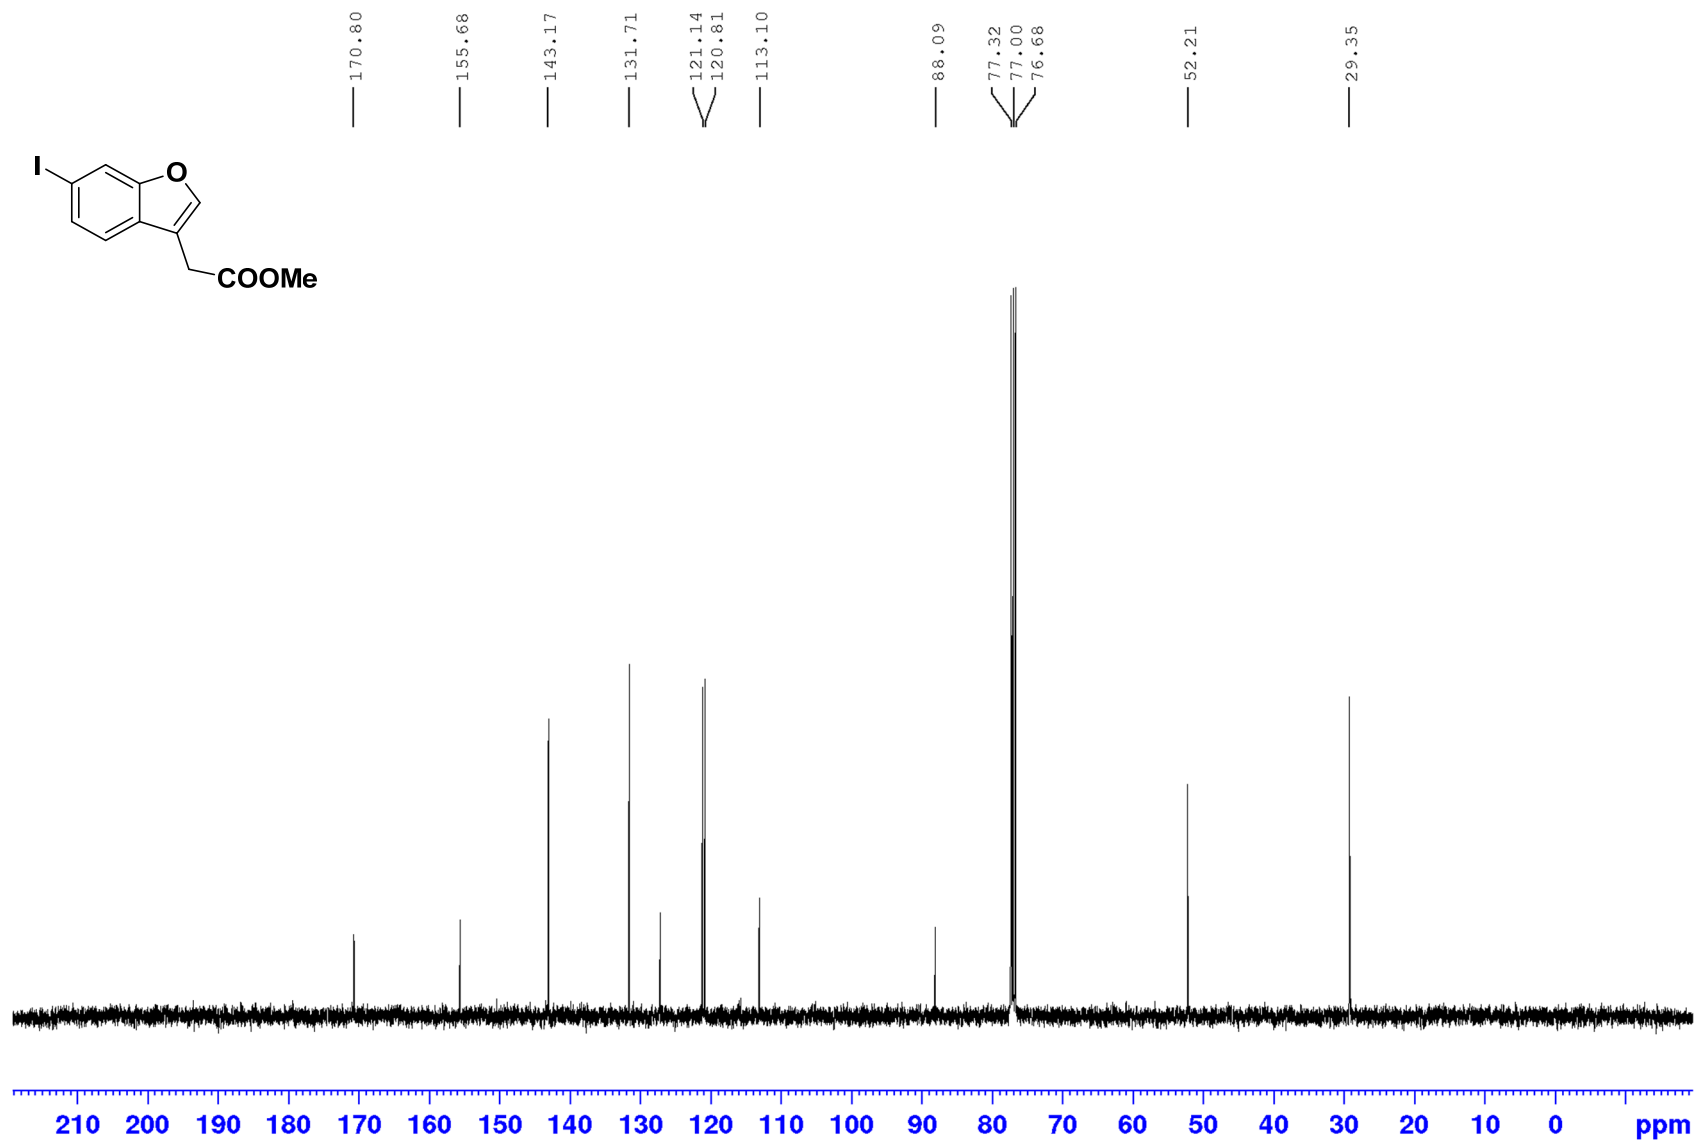

<sup>1</sup>H-NMR (400 MHz, CDCl<sub>3</sub>) of 2-(6-(Phenylamino)benzofuran-3-yl)acetic acid, 15

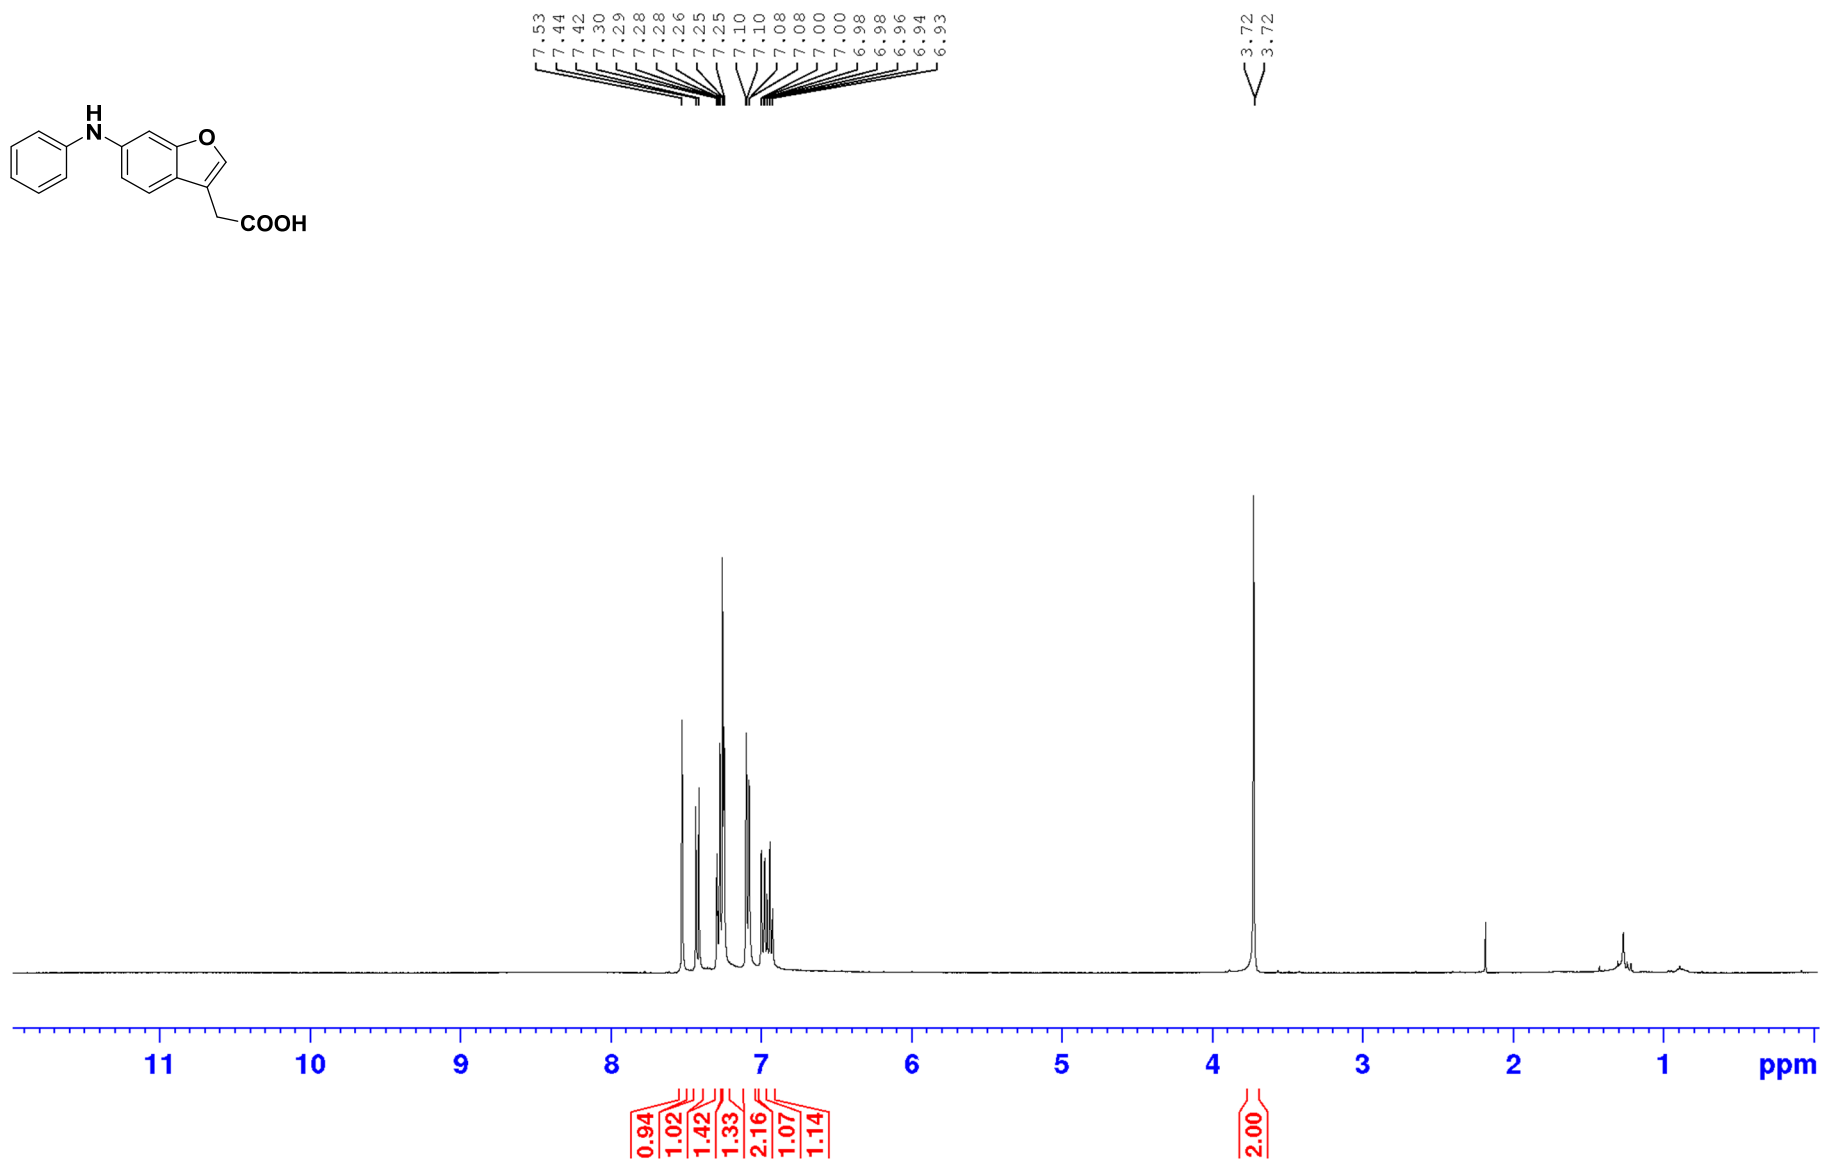

<sup>13</sup>C-NMR (125 MHz, CDCl<sub>3</sub>) of 2-(6-(Phenylamino)benzofuran-3-yl)acetic acid, **15**

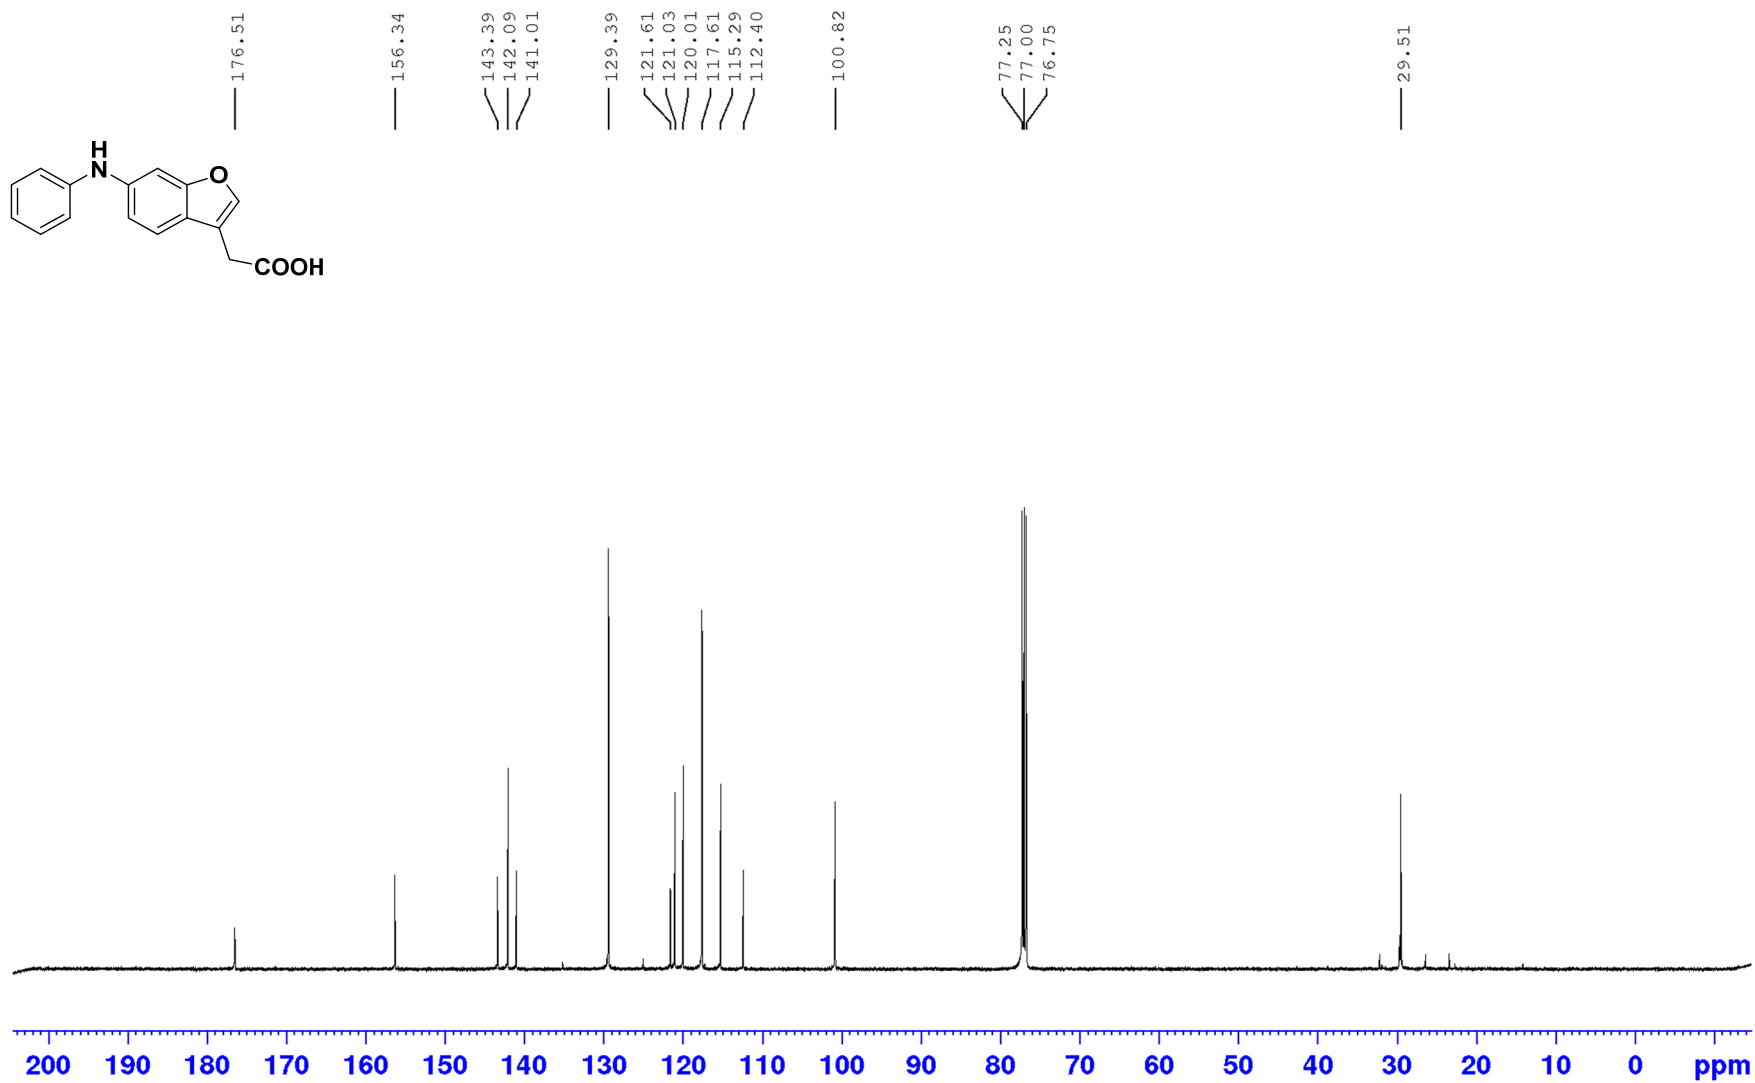

<sup>1</sup>H-NMR (400 MHz, CDCl<sub>3</sub>) of 2-(6-((4-Methoxyphenyl)amino)benzofuran-3-yl)acetic acid, 16

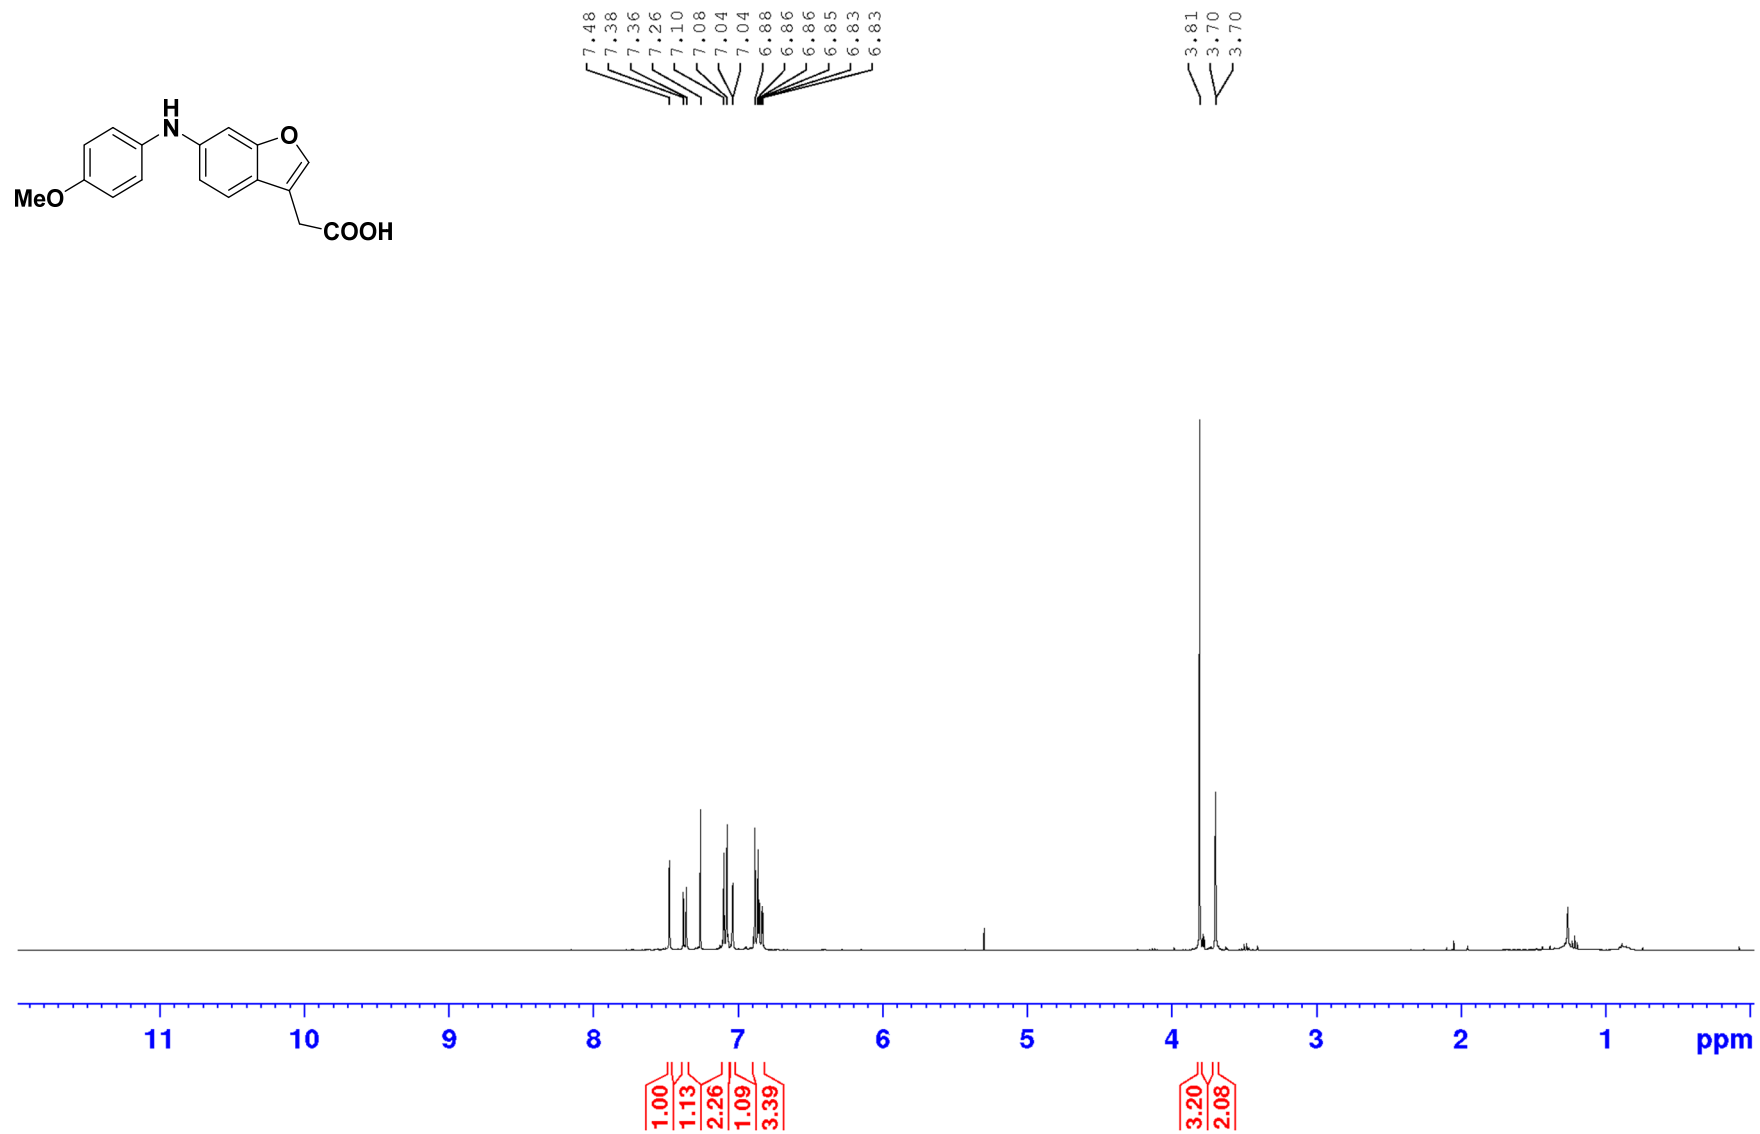



<sup>13</sup>C-NMR (100 MHz, CDCl<sub>3</sub>) of 2-((4-Methoxyphenyl)amino)benzofuran-3-yl)acetic acid, 16

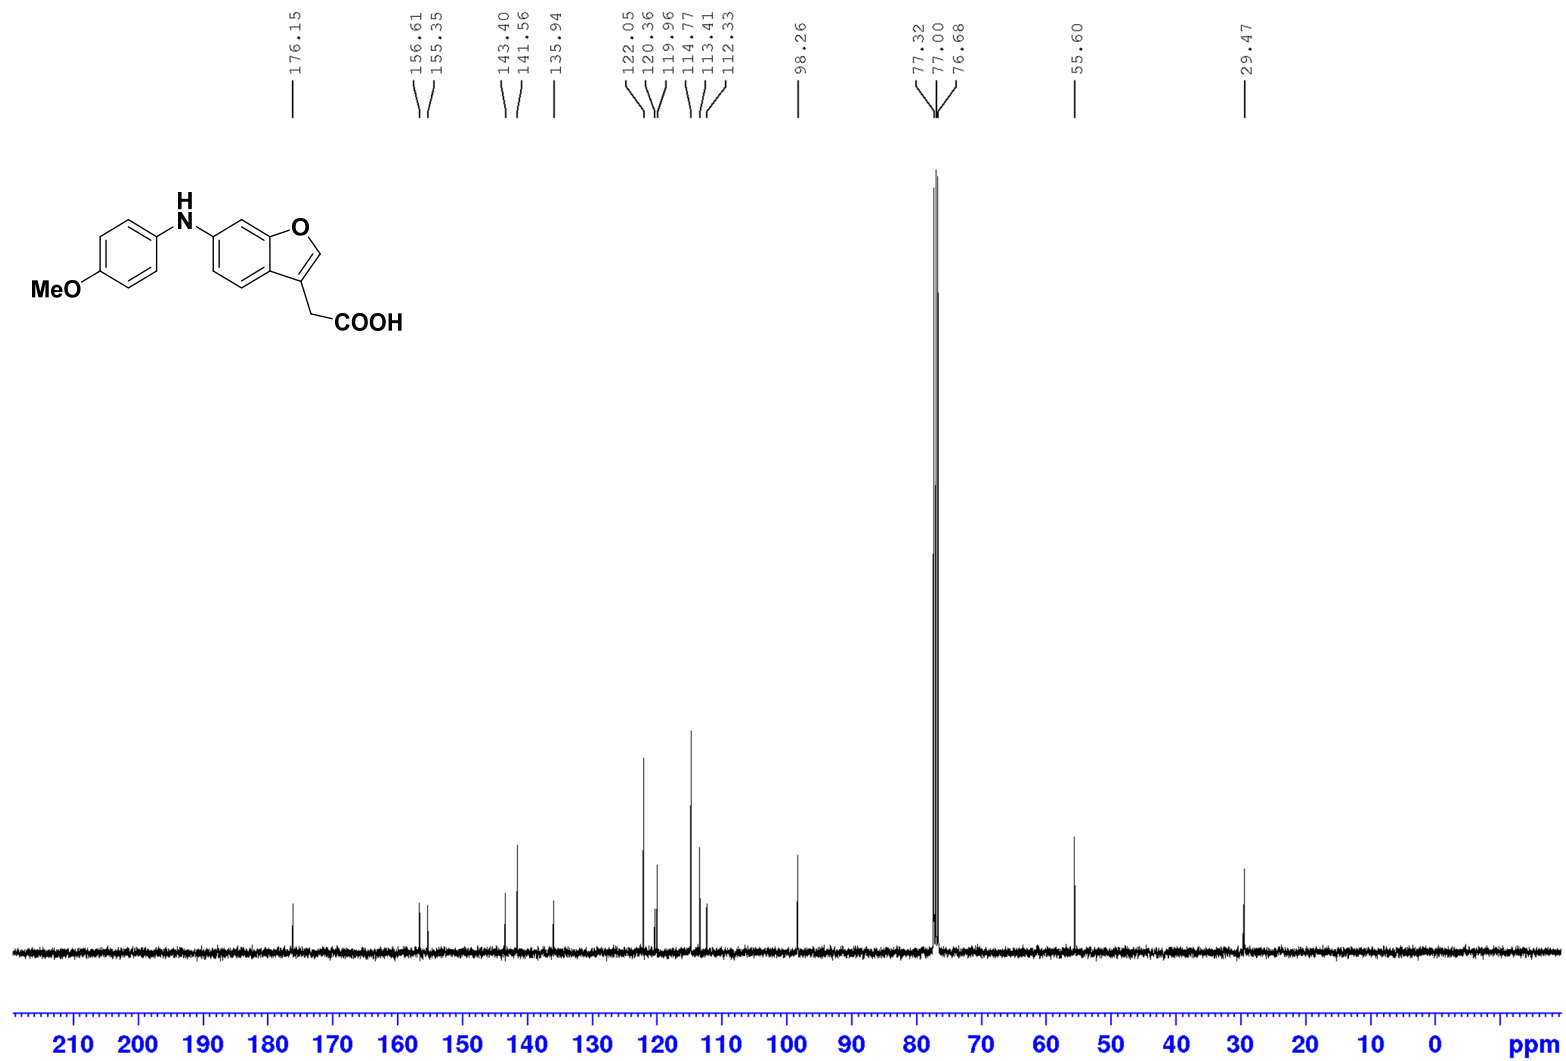

<sup>1</sup>H-NMR (400 MHz, CDCl<sub>3</sub>) of Isobutyl 2-(6-iso butoxybenzofuran-3-yl)acetate, 18

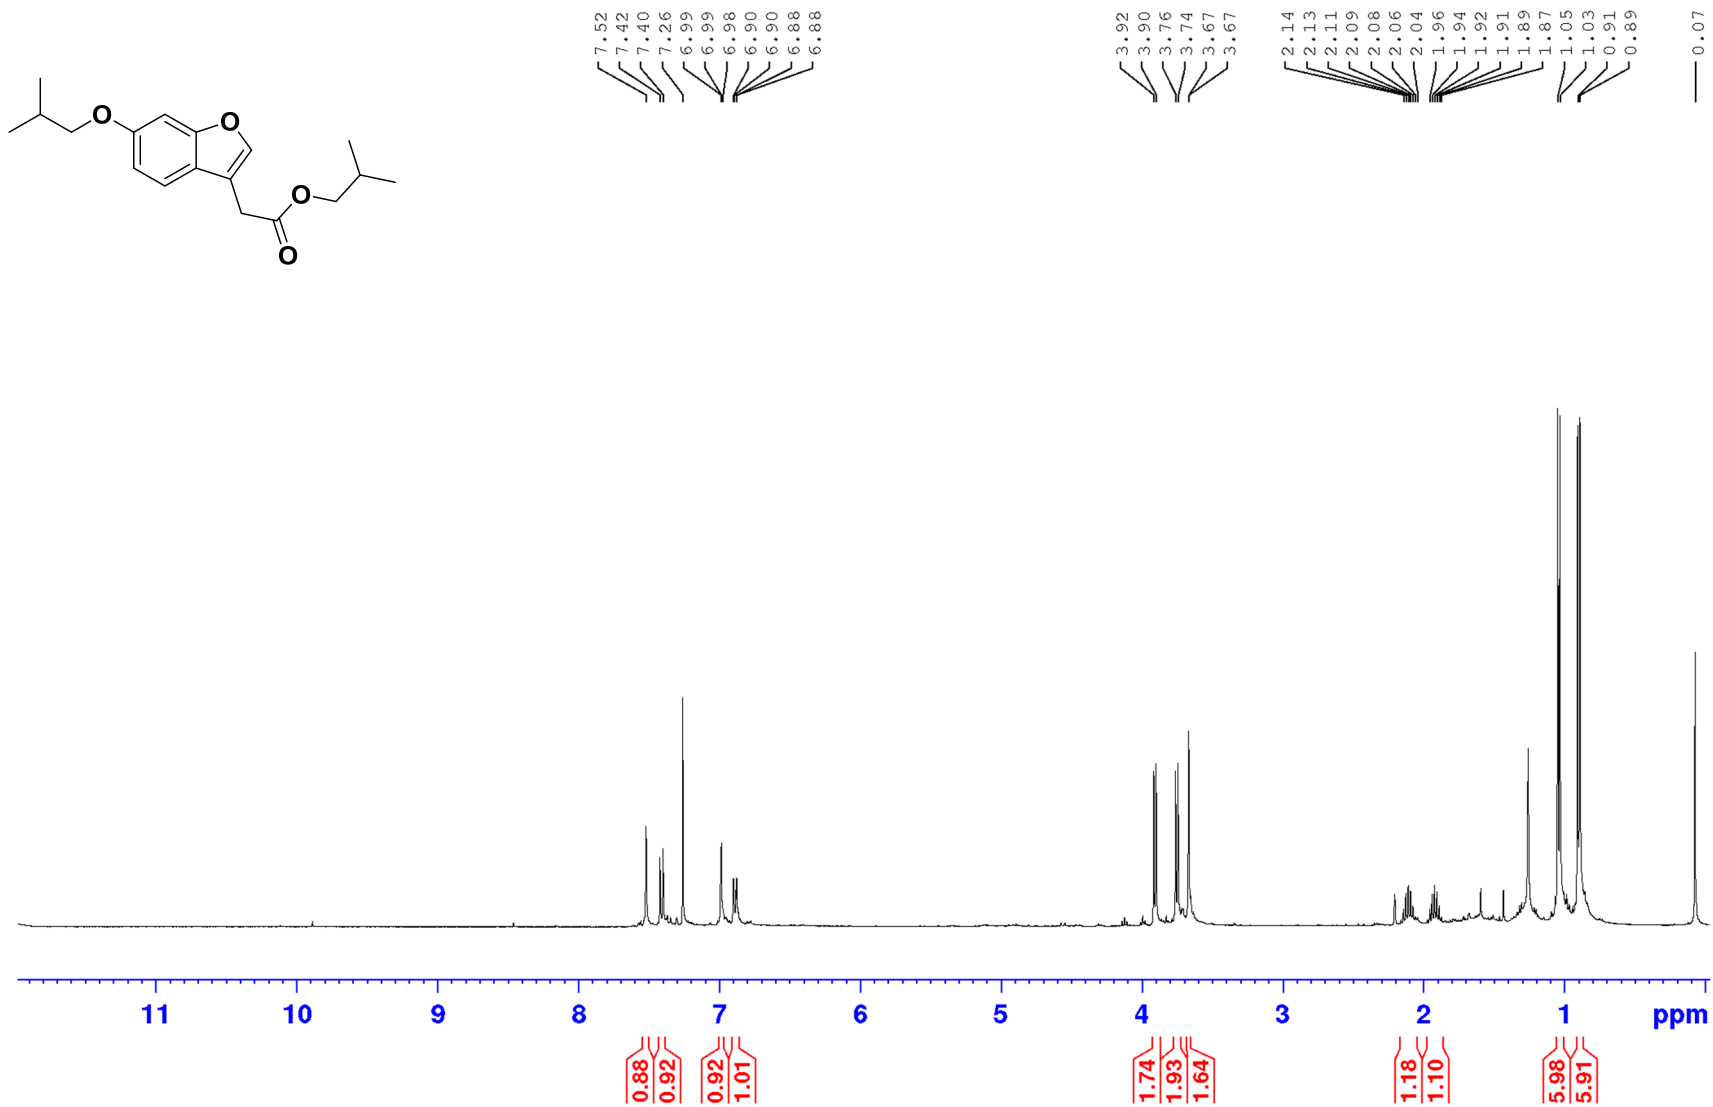

<sup>13</sup>C-NMR (100 MHz, CDCl<sub>3</sub>) of **Isobutyl 2-(6-iso butoxybenzofuran-3-yl)acetate, 18**

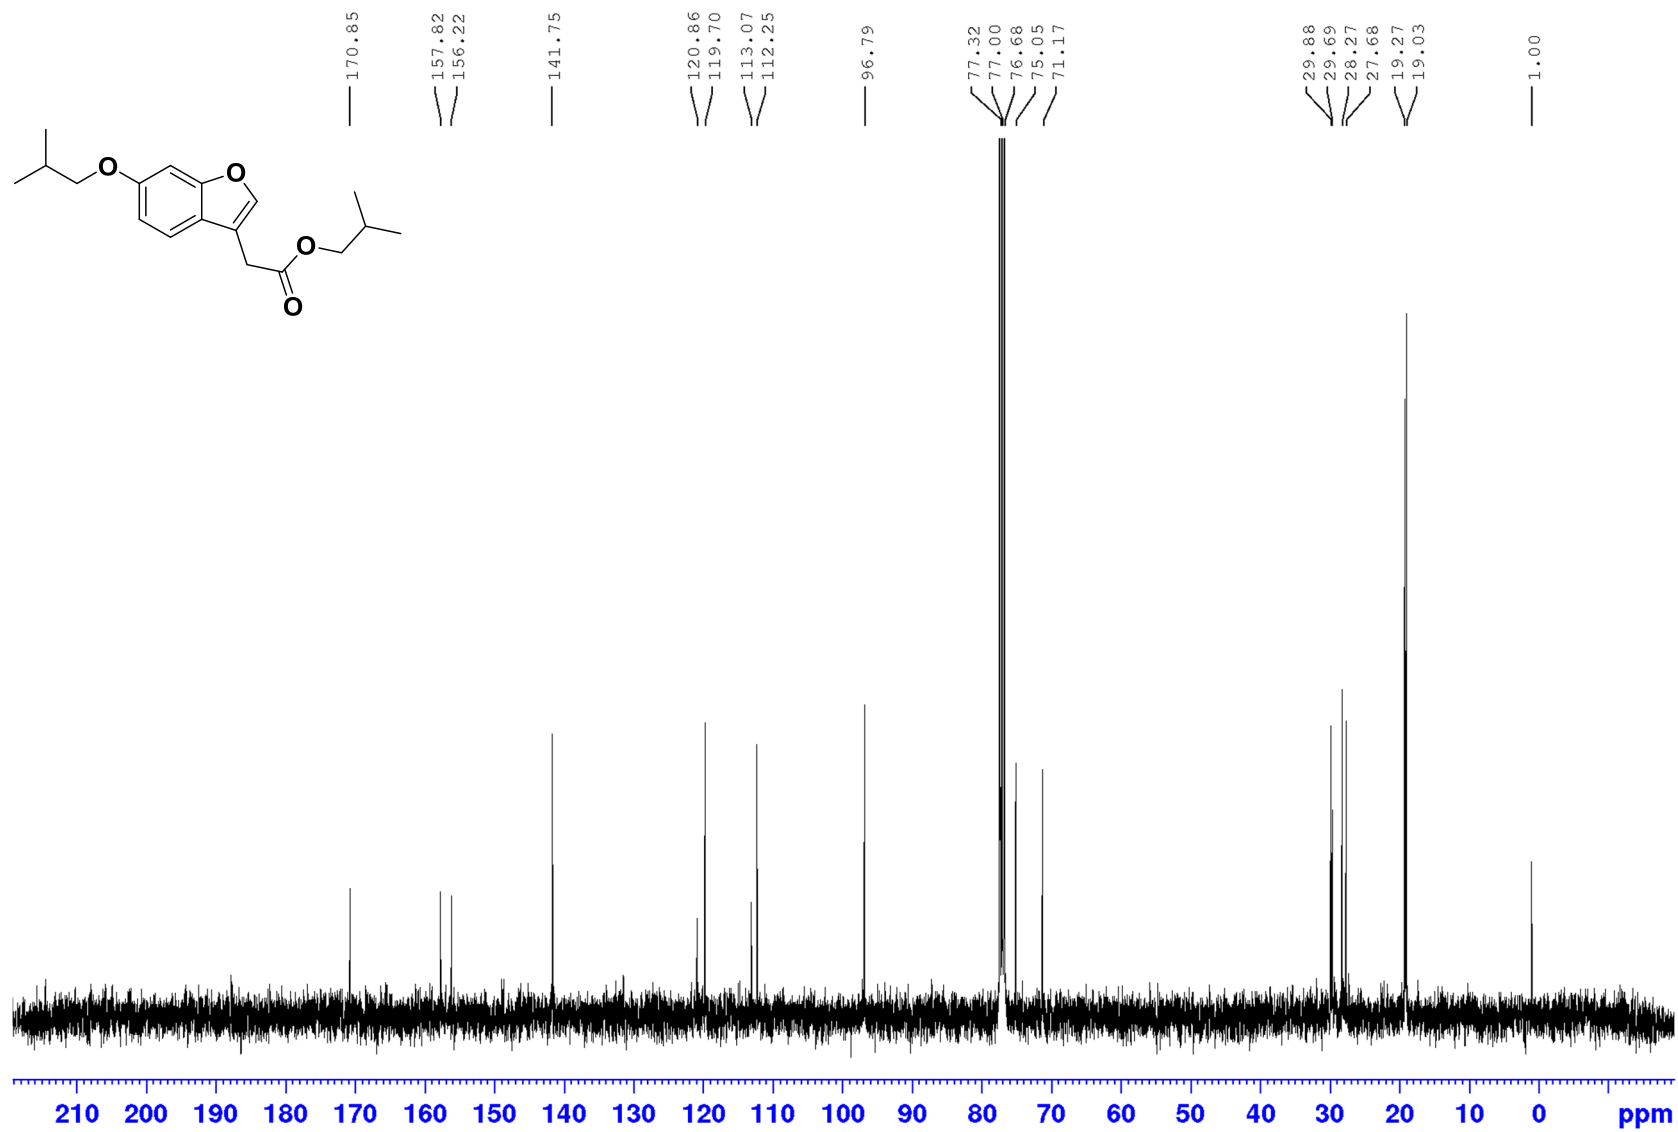

<sup>11</sup>H-NMR (400 MHz, CDCl<sub>3</sub>) of **Benzyl 2-(6-(benzyloxy)benzofuran-3-yl)acetate, 19**

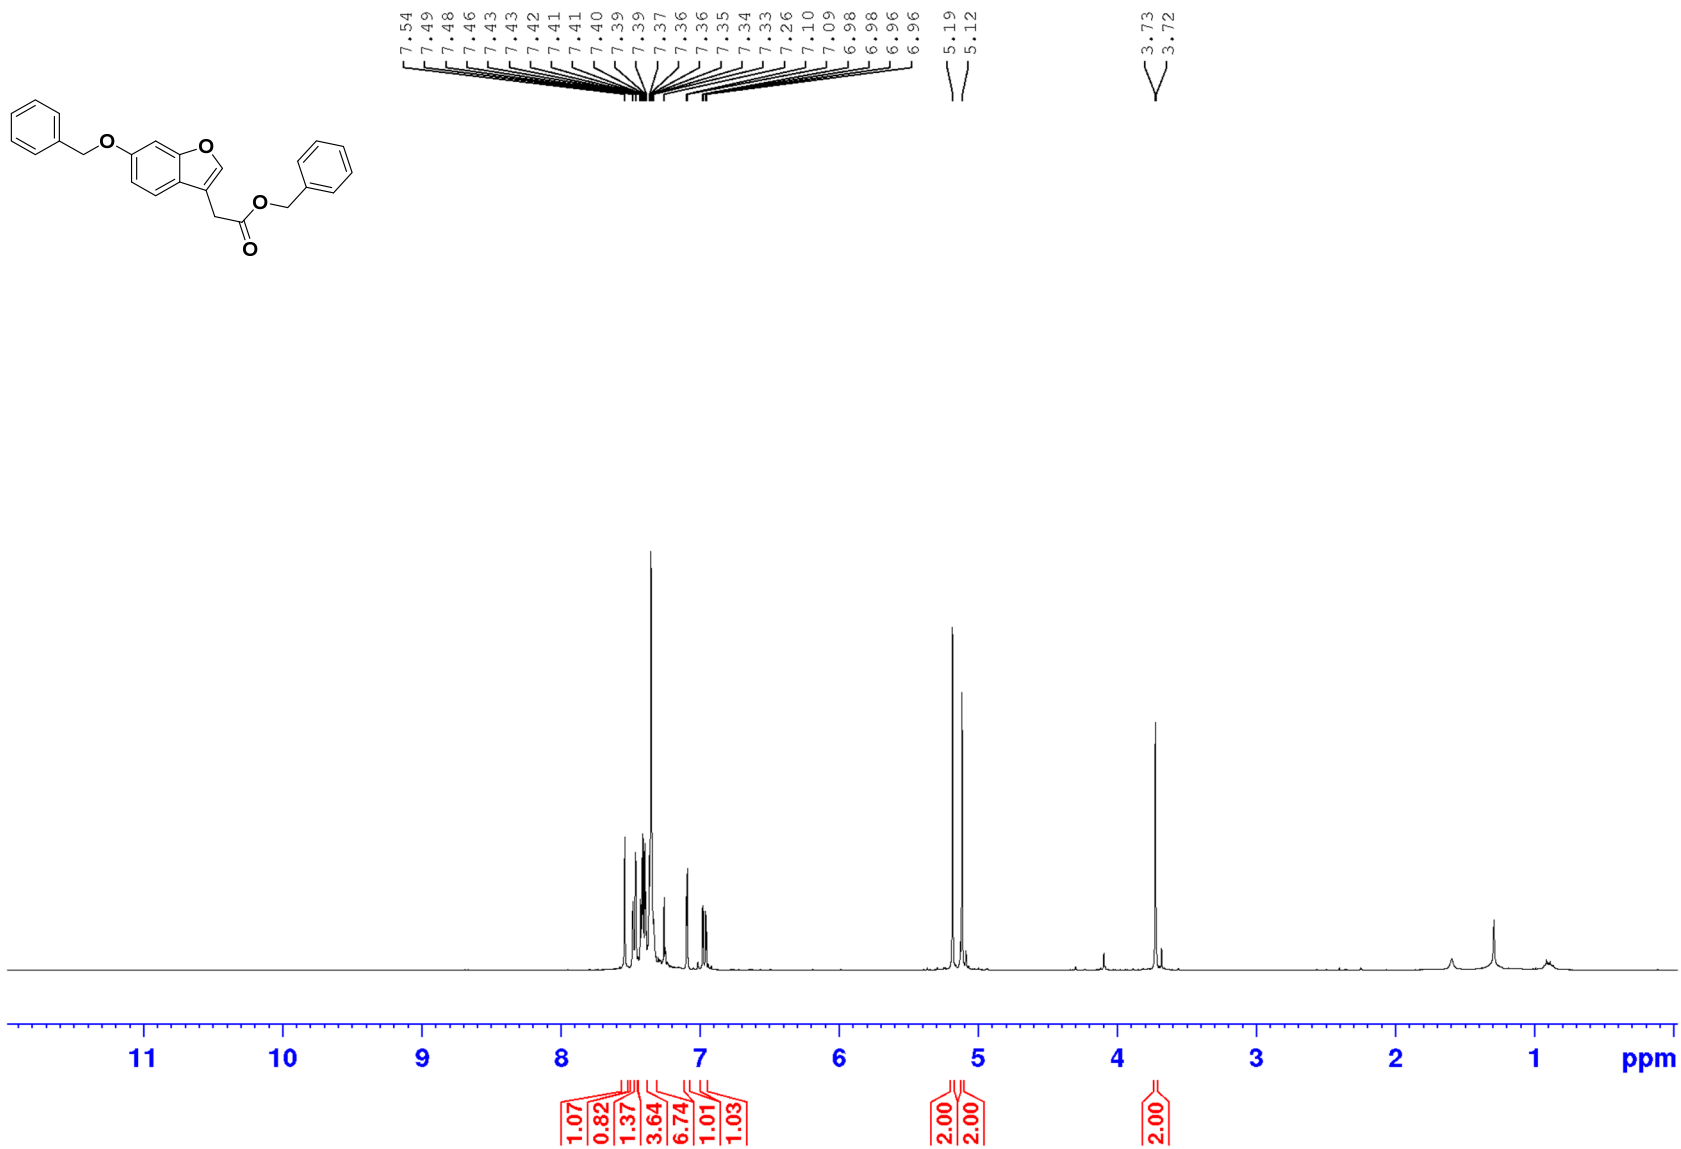

<sup>13</sup>C-NMR (100 MHz, CDCl<sub>3</sub>) of **Benzyl 2-(6-(benzyloxy)benzofuran-3-yl)acetate, 19**

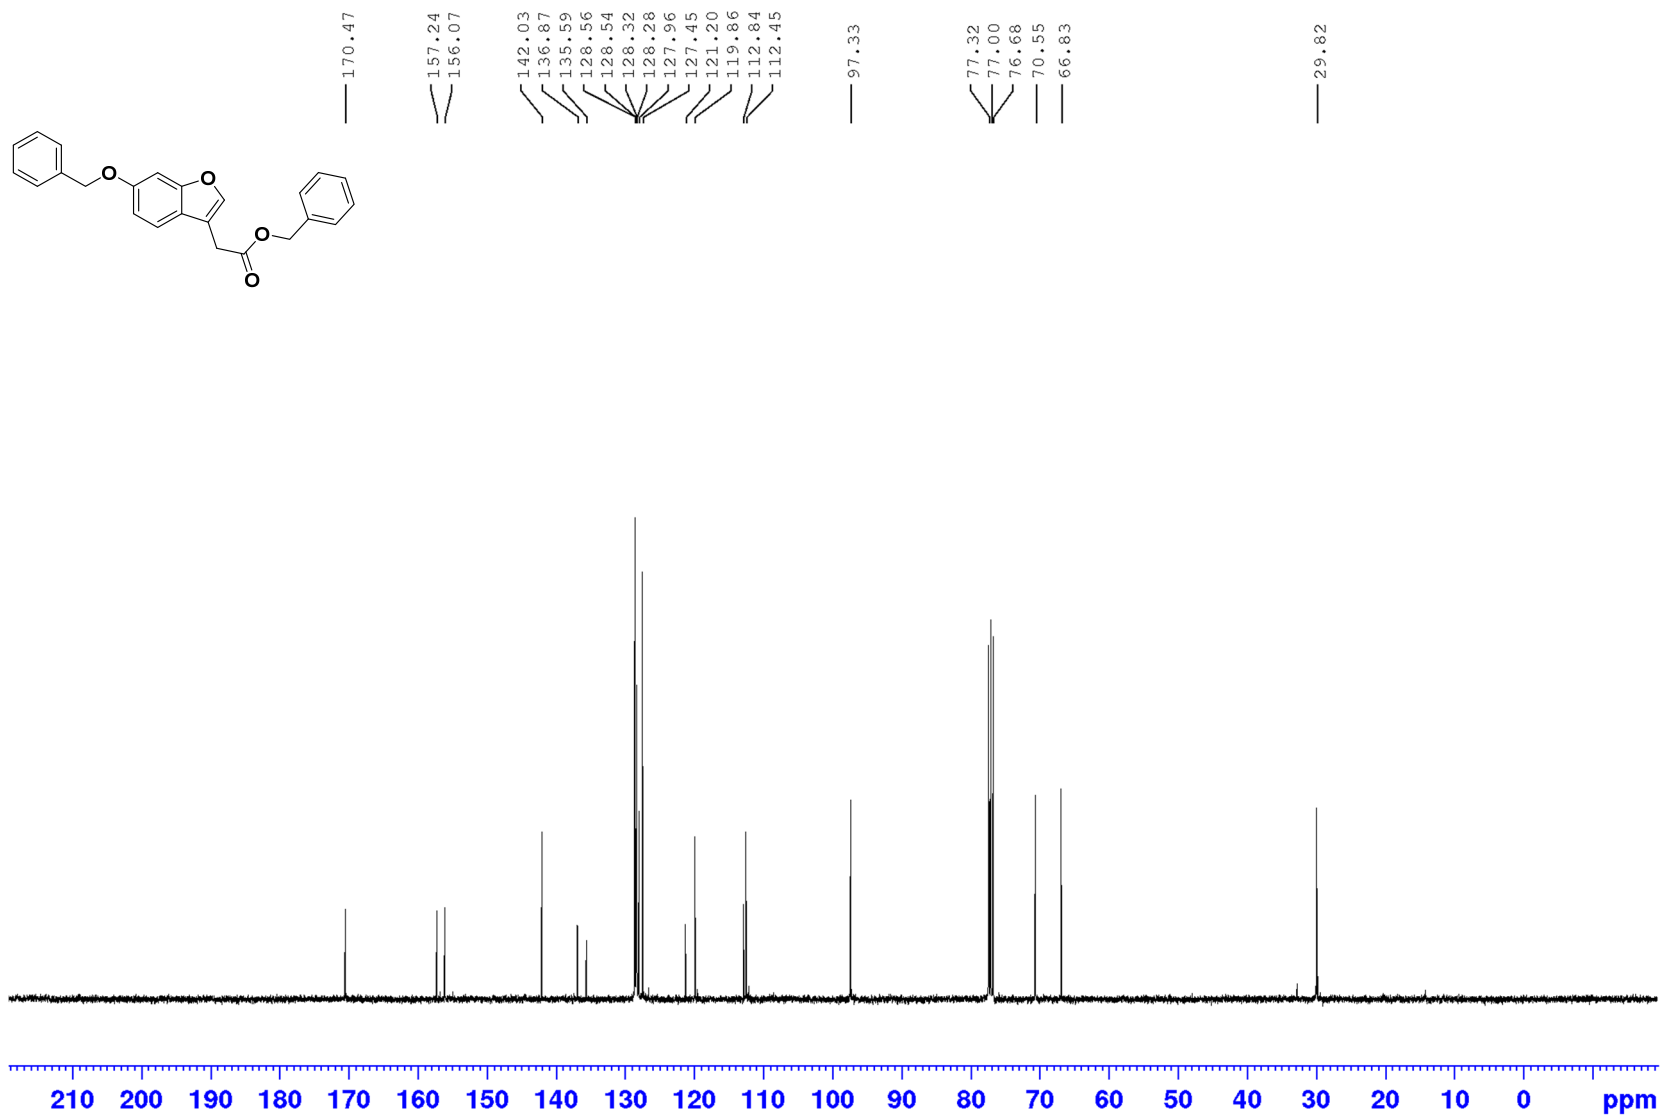

<sup>1</sup>H-NMR (400 MHz, CDCl<sub>3</sub>) of **Benzyl 2-(5-benzyloxy)benzofuran-3-yl)acetate, 20**

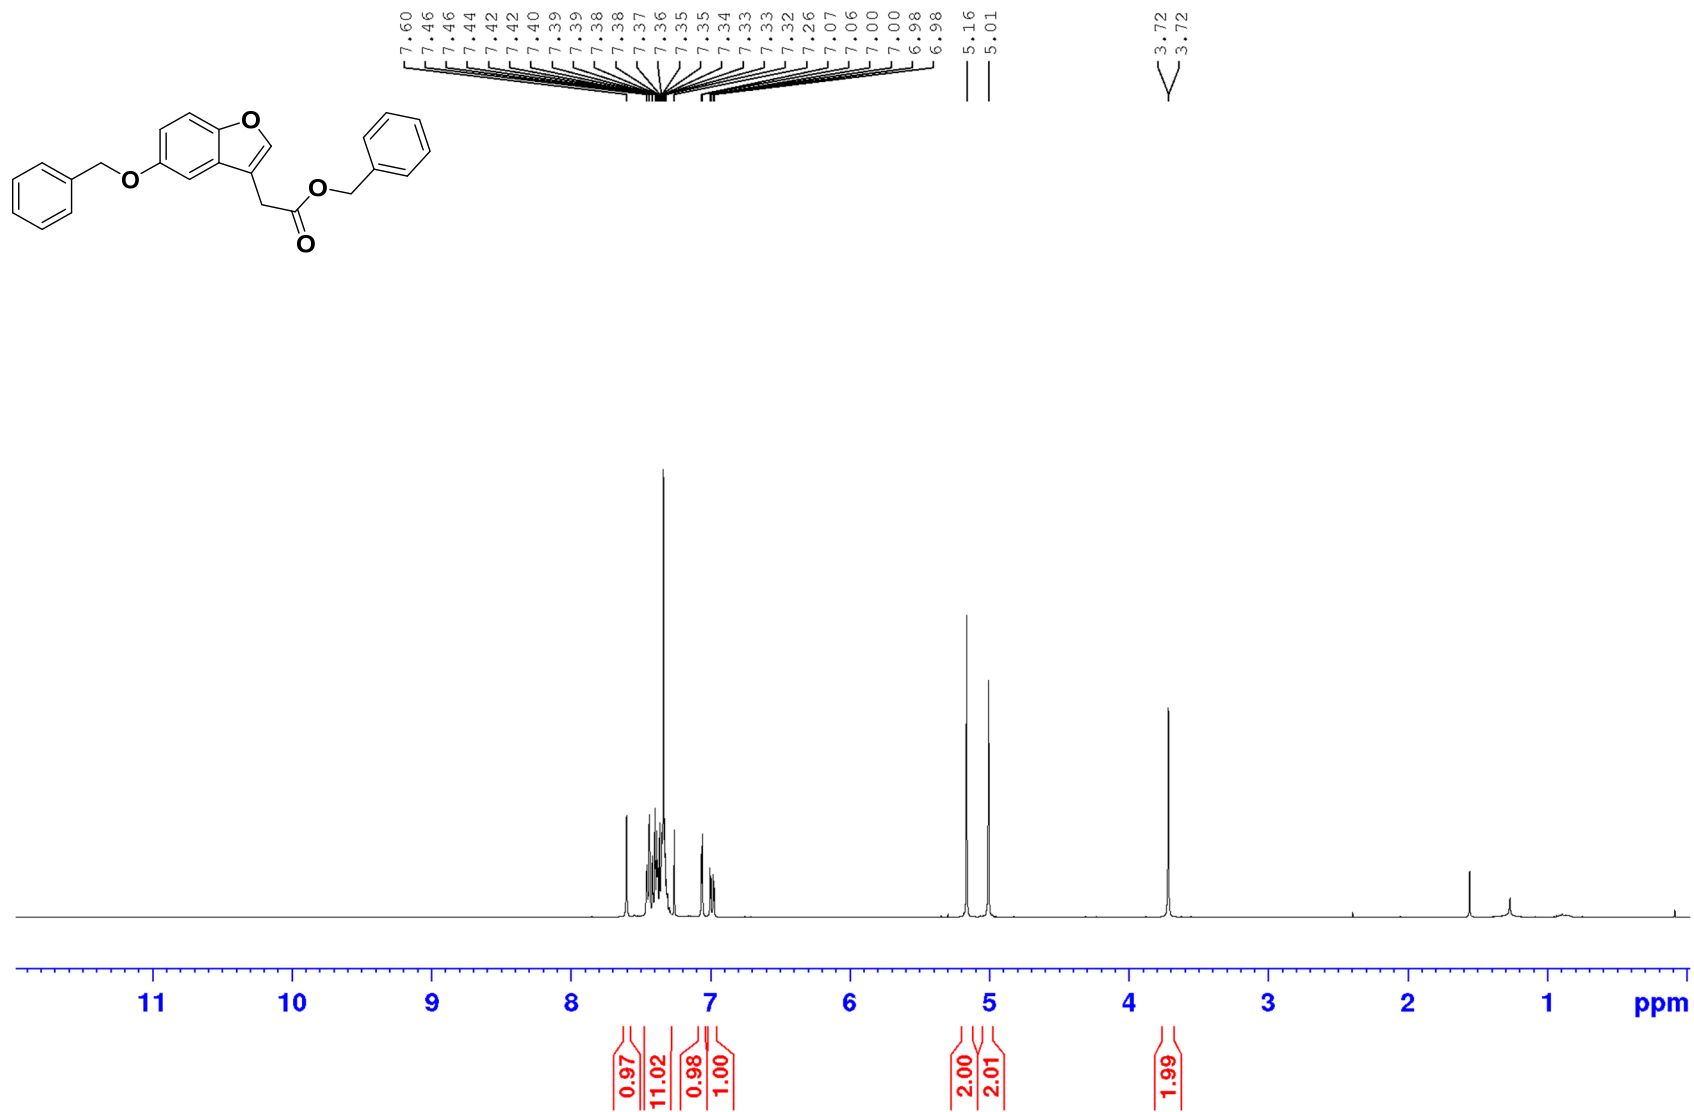

<sup>13</sup>C-NMR (100 MHz, CDCl<sub>3</sub>) of **Benzyl 2-(5-benzyloxy)benzofuran-3-yl)acetate, 20**

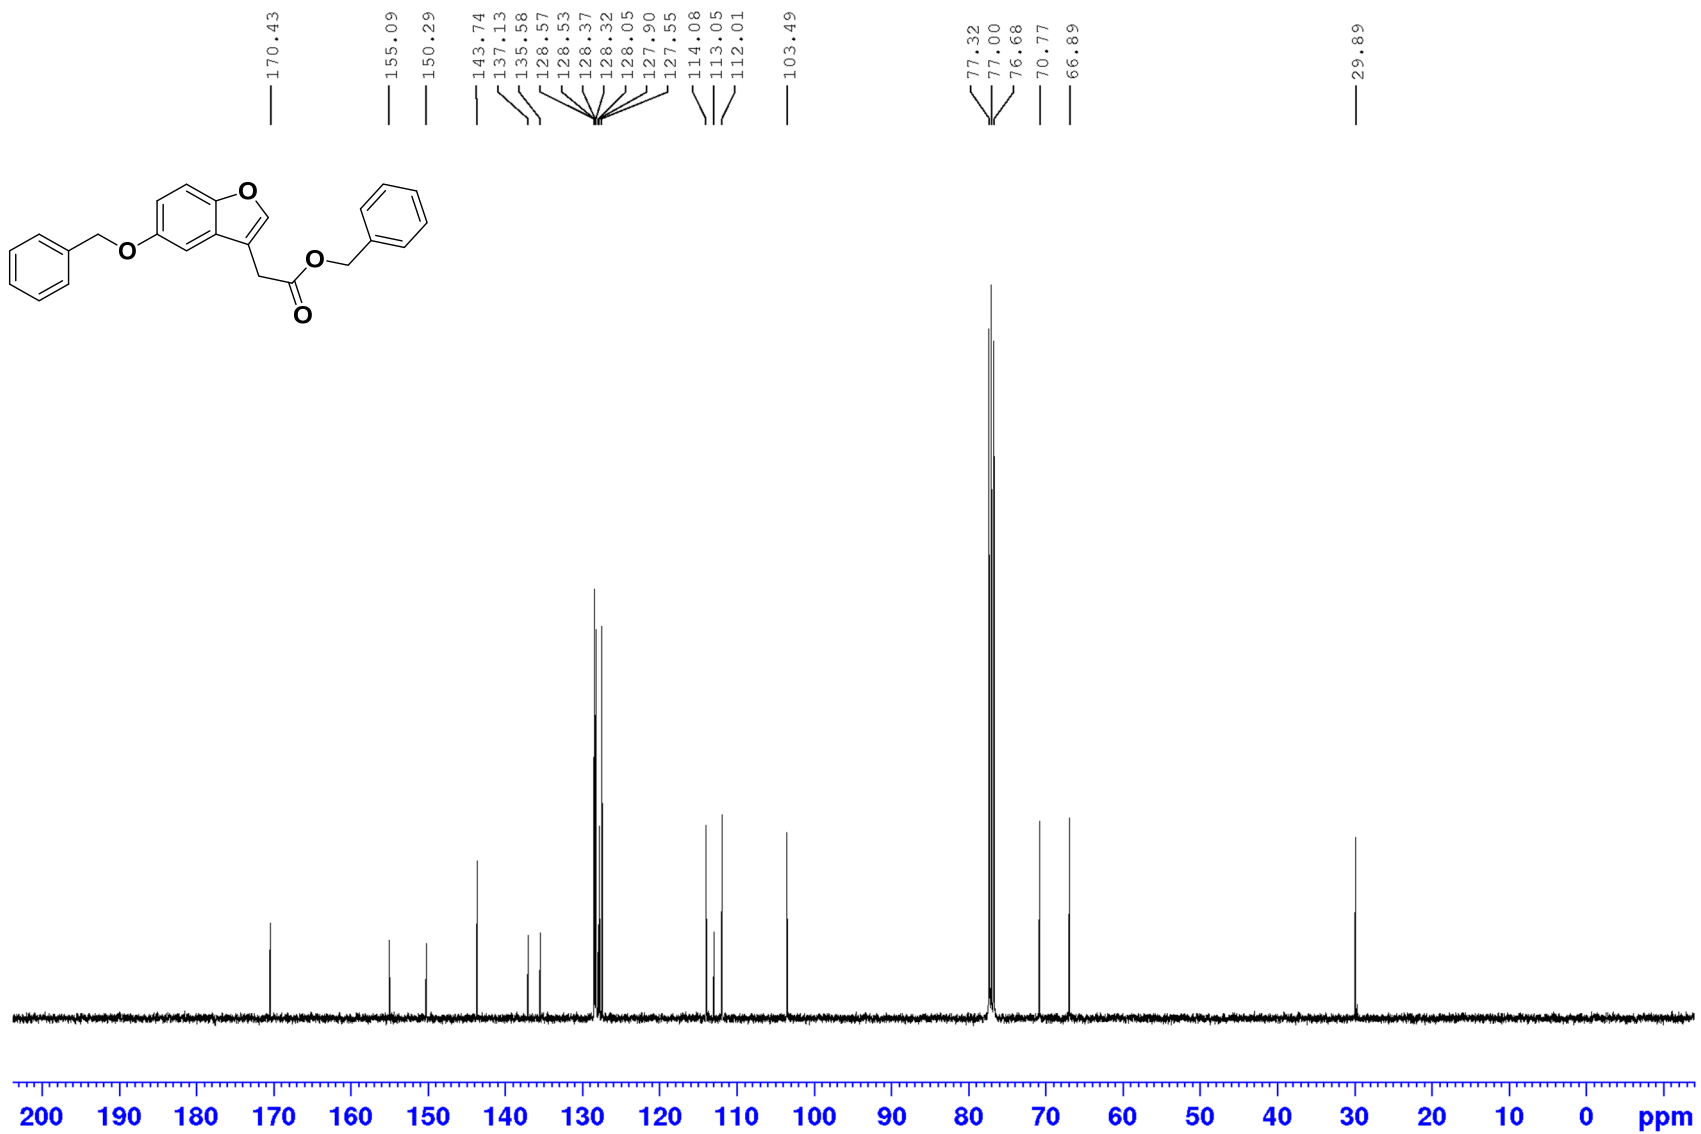

<sup>1</sup>H-NMR (500 MHz, CDCl<sub>3</sub>) of 2-(6-Butoxybenzofuran-3-yl)acetic acid, 21

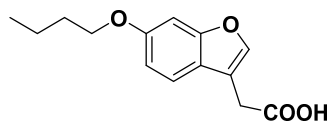

7.531  
7.413  
7.396  
7.260  
7.000  
6.996  
6.899  
6.895  
6.882  
6.878

4.005  
3.992  
3.979  
3.712  
3.710

1.818  
1.805  
1.799  
1.791  
1.775  
1.762  
1.545  
1.530  
1.515  
1.500  
1.485  
1.471  
0.997  
0.982  
0.968

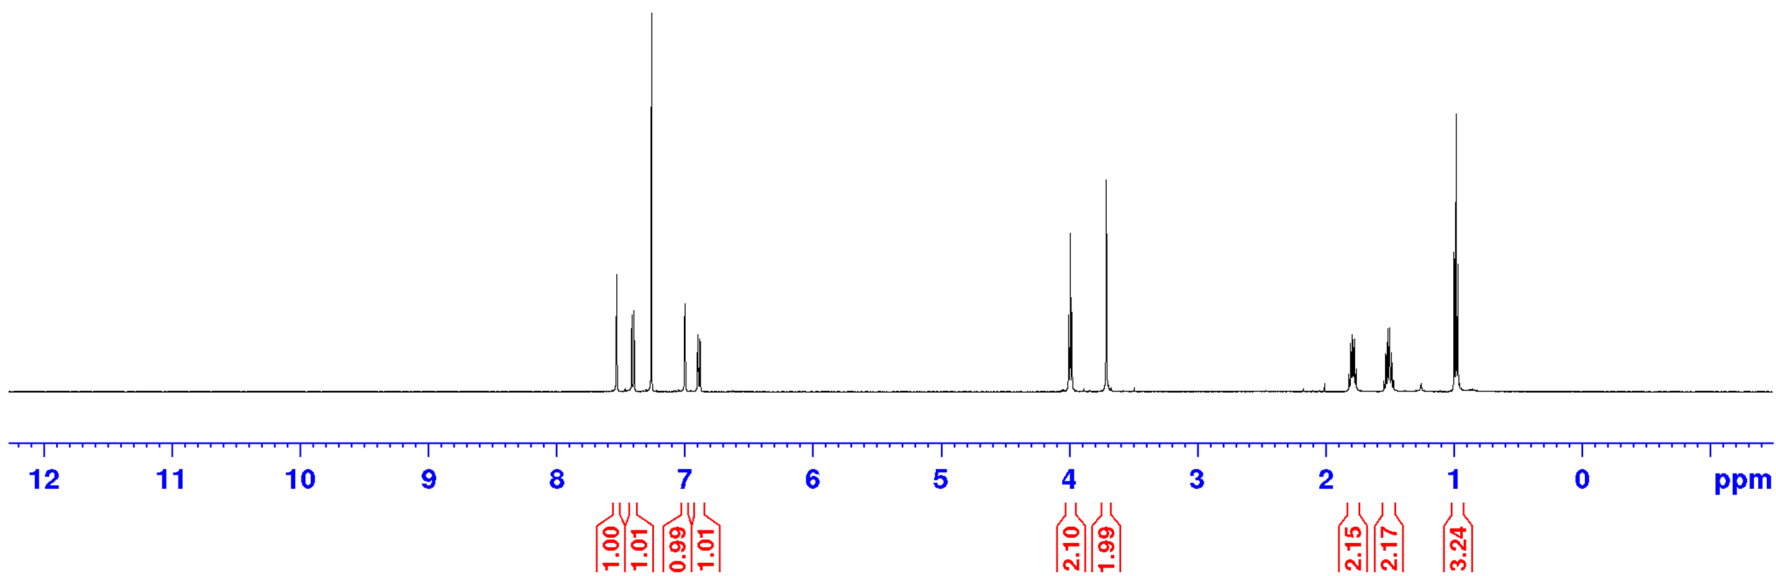



<sup>13</sup>C-NMR (100 MHz, CDCl<sub>3</sub>) of 2-(6-Butoxybenzofuran-3-yl)acetic acid, 21

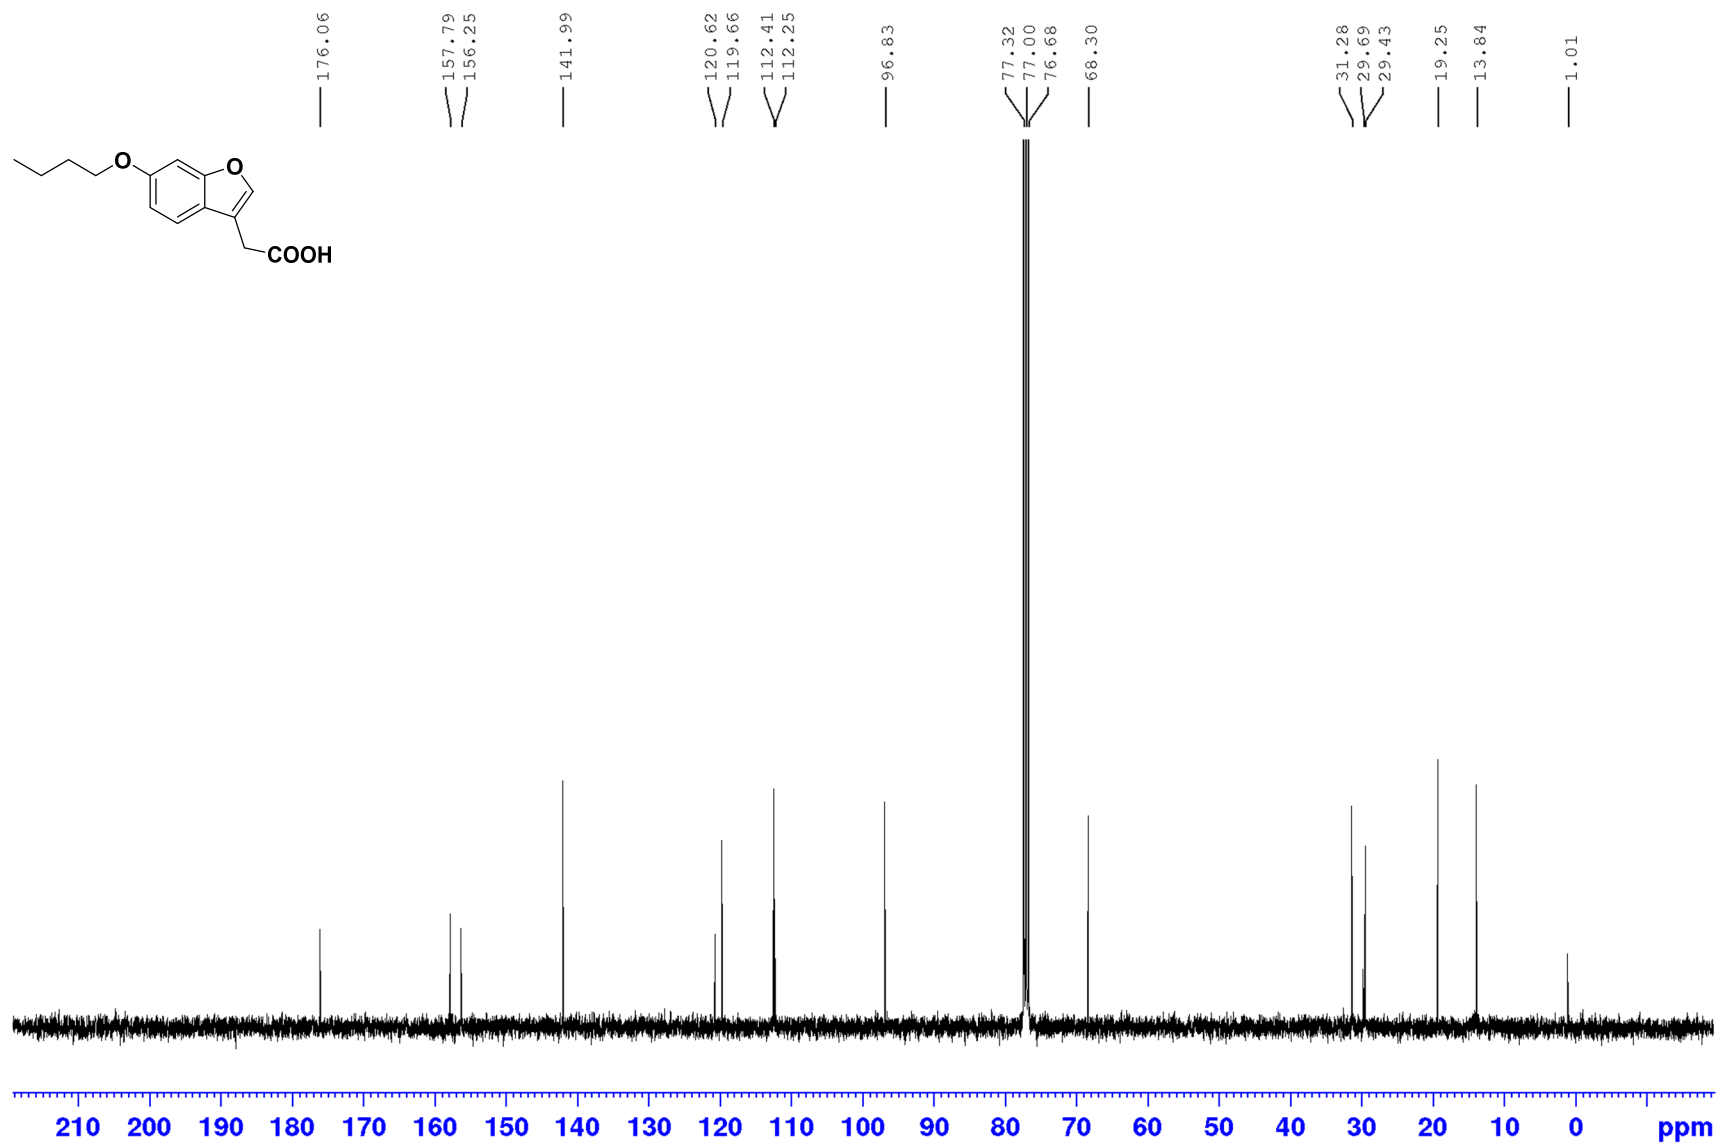

<sup>1</sup>H-NMR (400 MHz, CDCl<sub>3</sub>) of 2-(6-Isobutoxybenzofuran-3-yl)acetic acid, 22

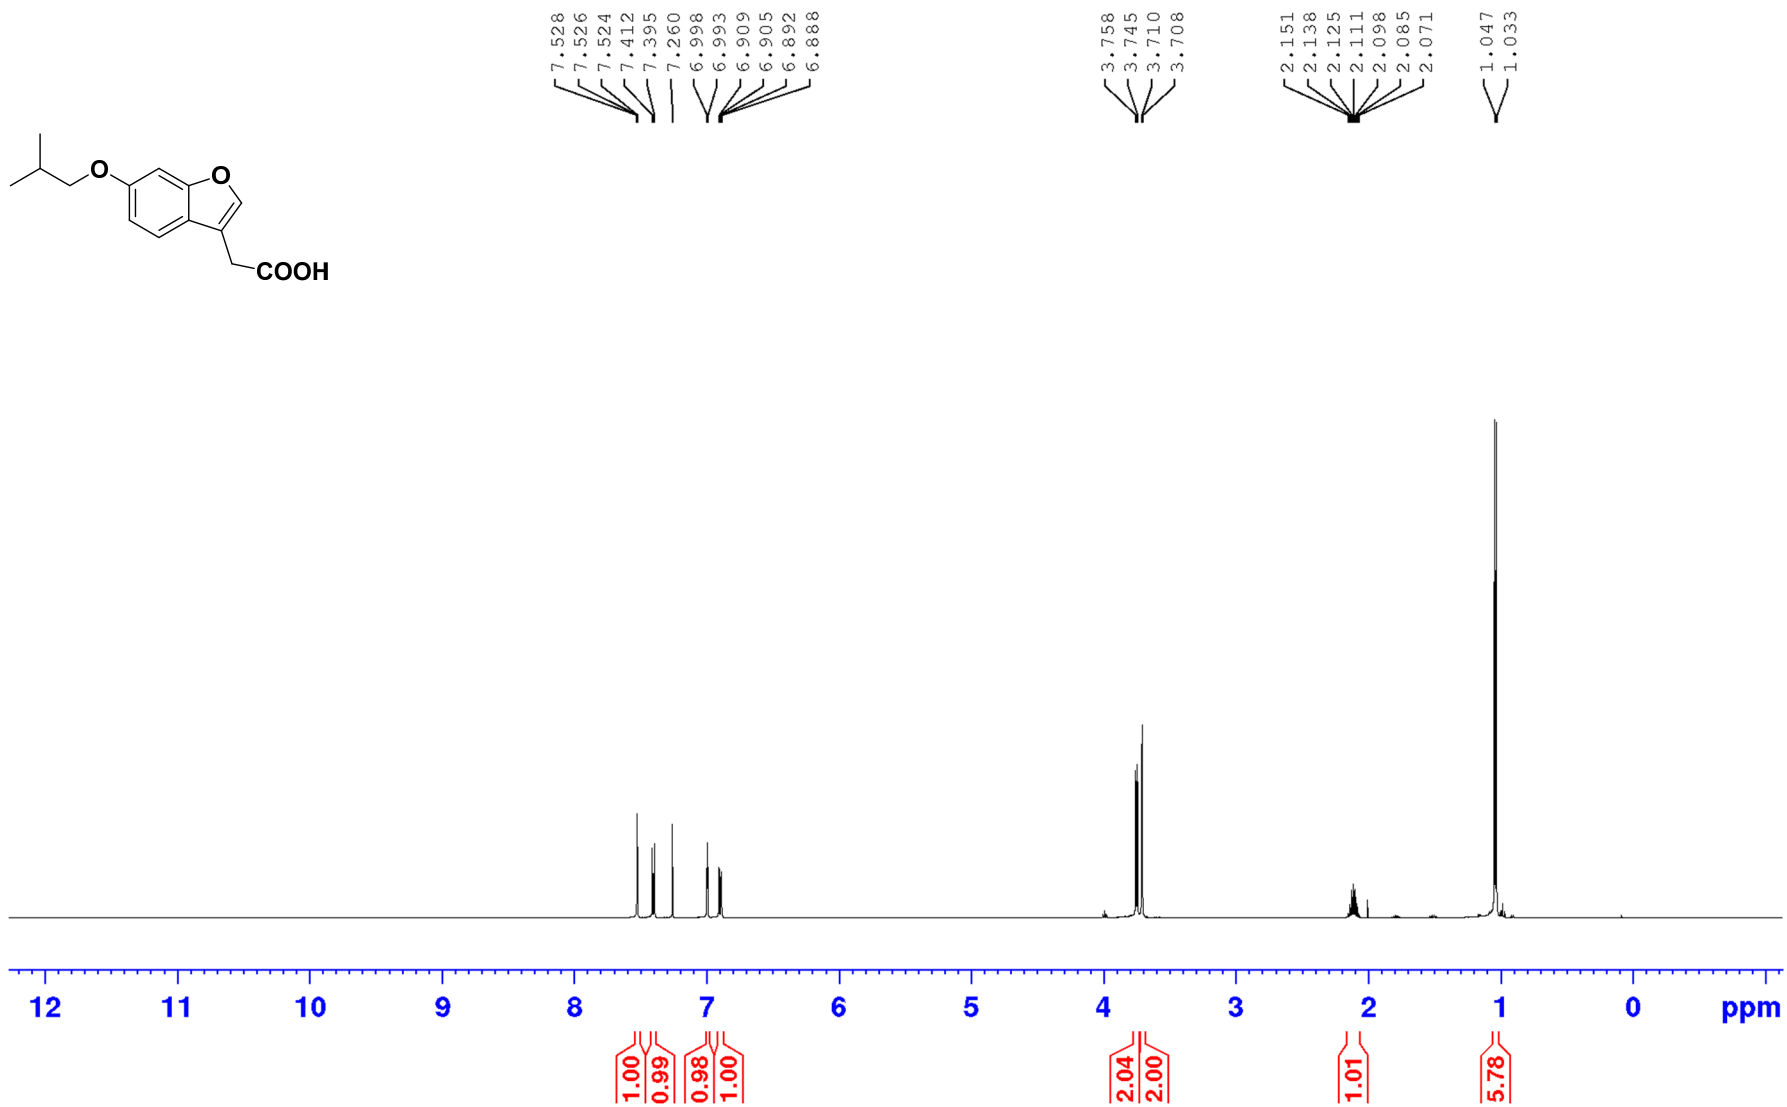

<sup>13</sup>C-NMR (100 MHz, CDCl<sub>3</sub>) of 2-(6-Isobutoxybenzofuran-3-yl)acetic acid, 22

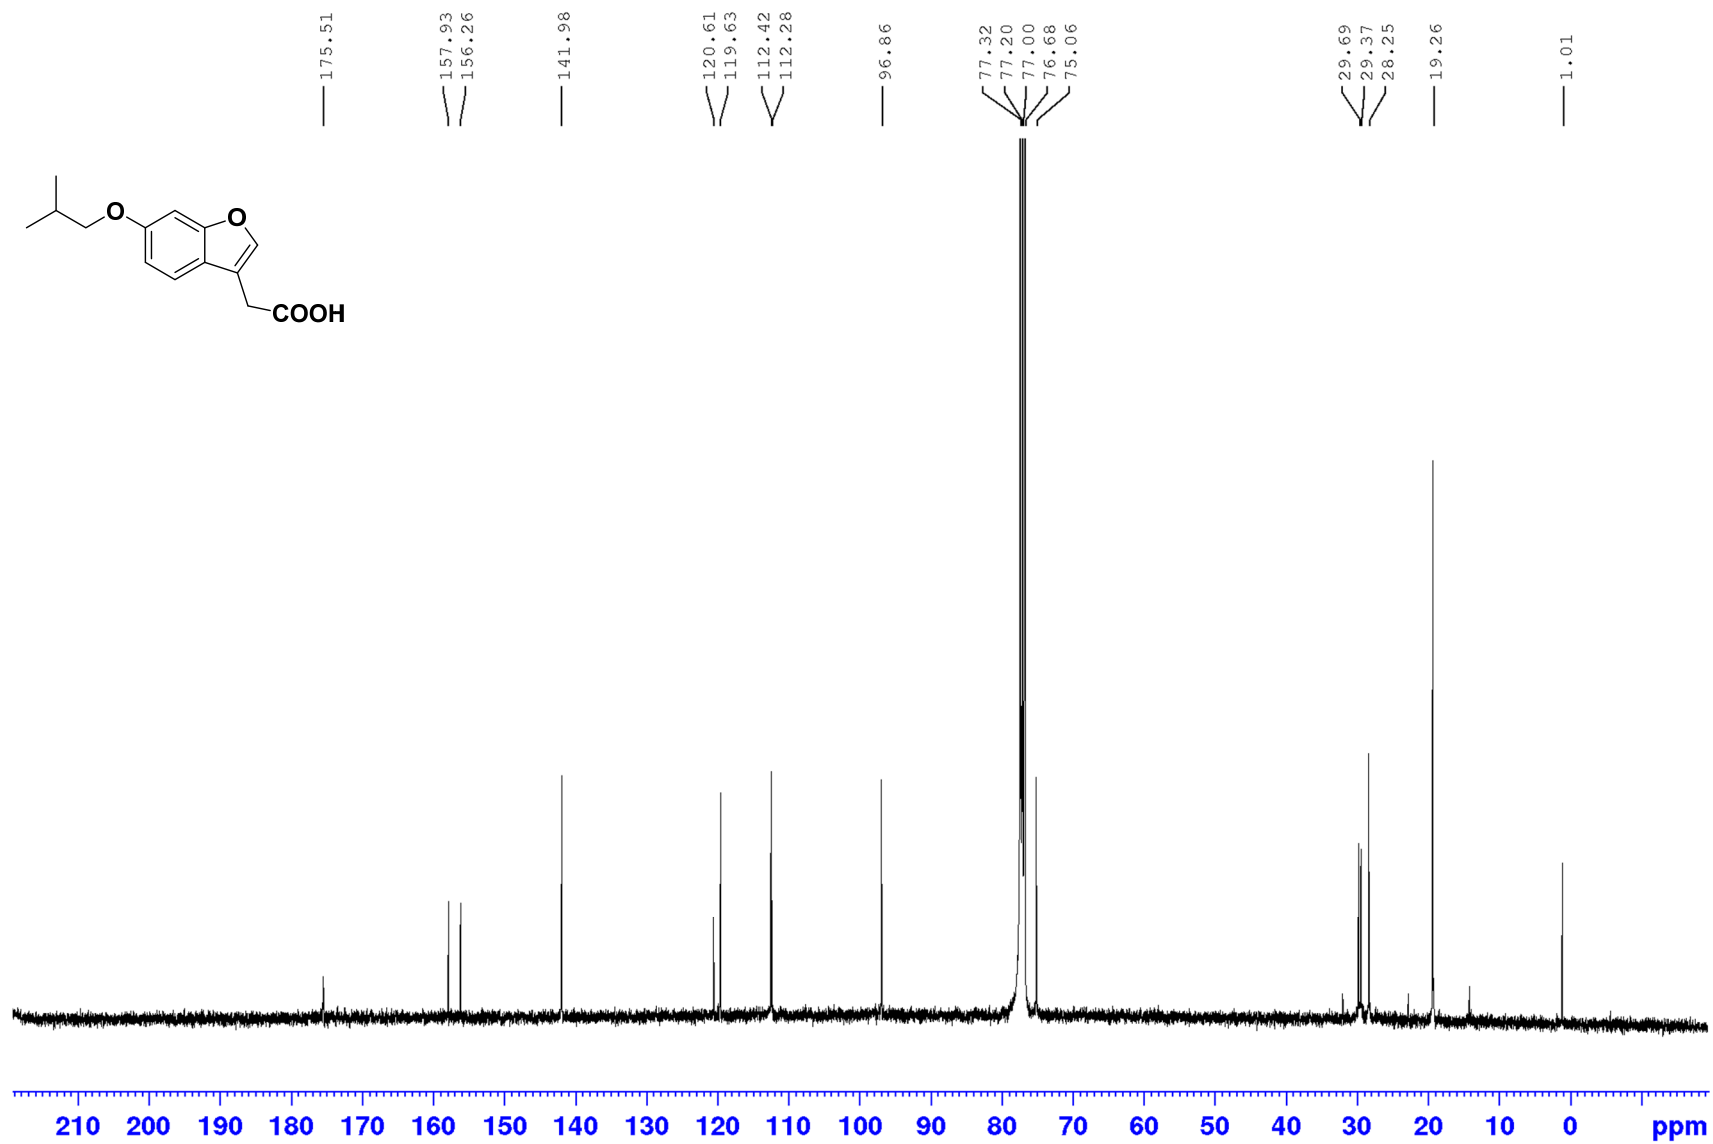

<sup>1</sup>H-NMR (500 MHz, CDCl<sub>3</sub>) of 2-(6-(Benzylfuran-3-yl)acetic acid, 23

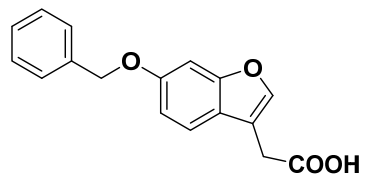

7.540  
7.463  
7.460  
7.446  
7.437  
7.420  
7.406  
7.403  
7.392  
7.389  
7.379  
7.377  
7.344  
7.334  
7.330  
7.325  
7.315  
7.260  
7.081  
7.077  
6.990  
6.986  
6.973  
6.969

5.106

3.715  
3.713

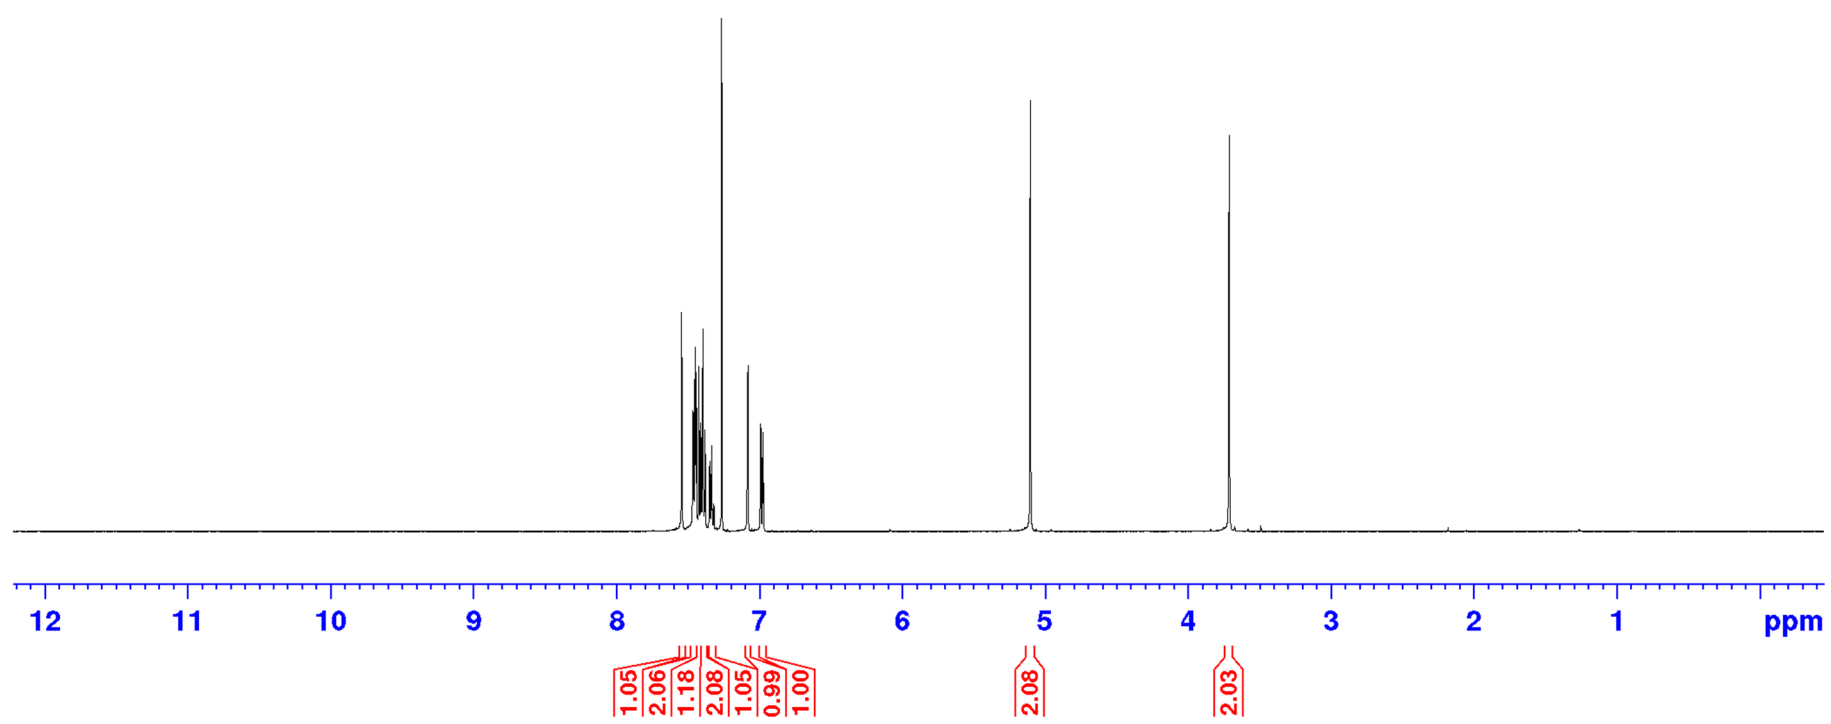

<sup>13</sup>C-NMR (100 MHz, CDCl<sub>3</sub>) of 2-(6-(Benzylfuran-3-yl)acetic acid, 23

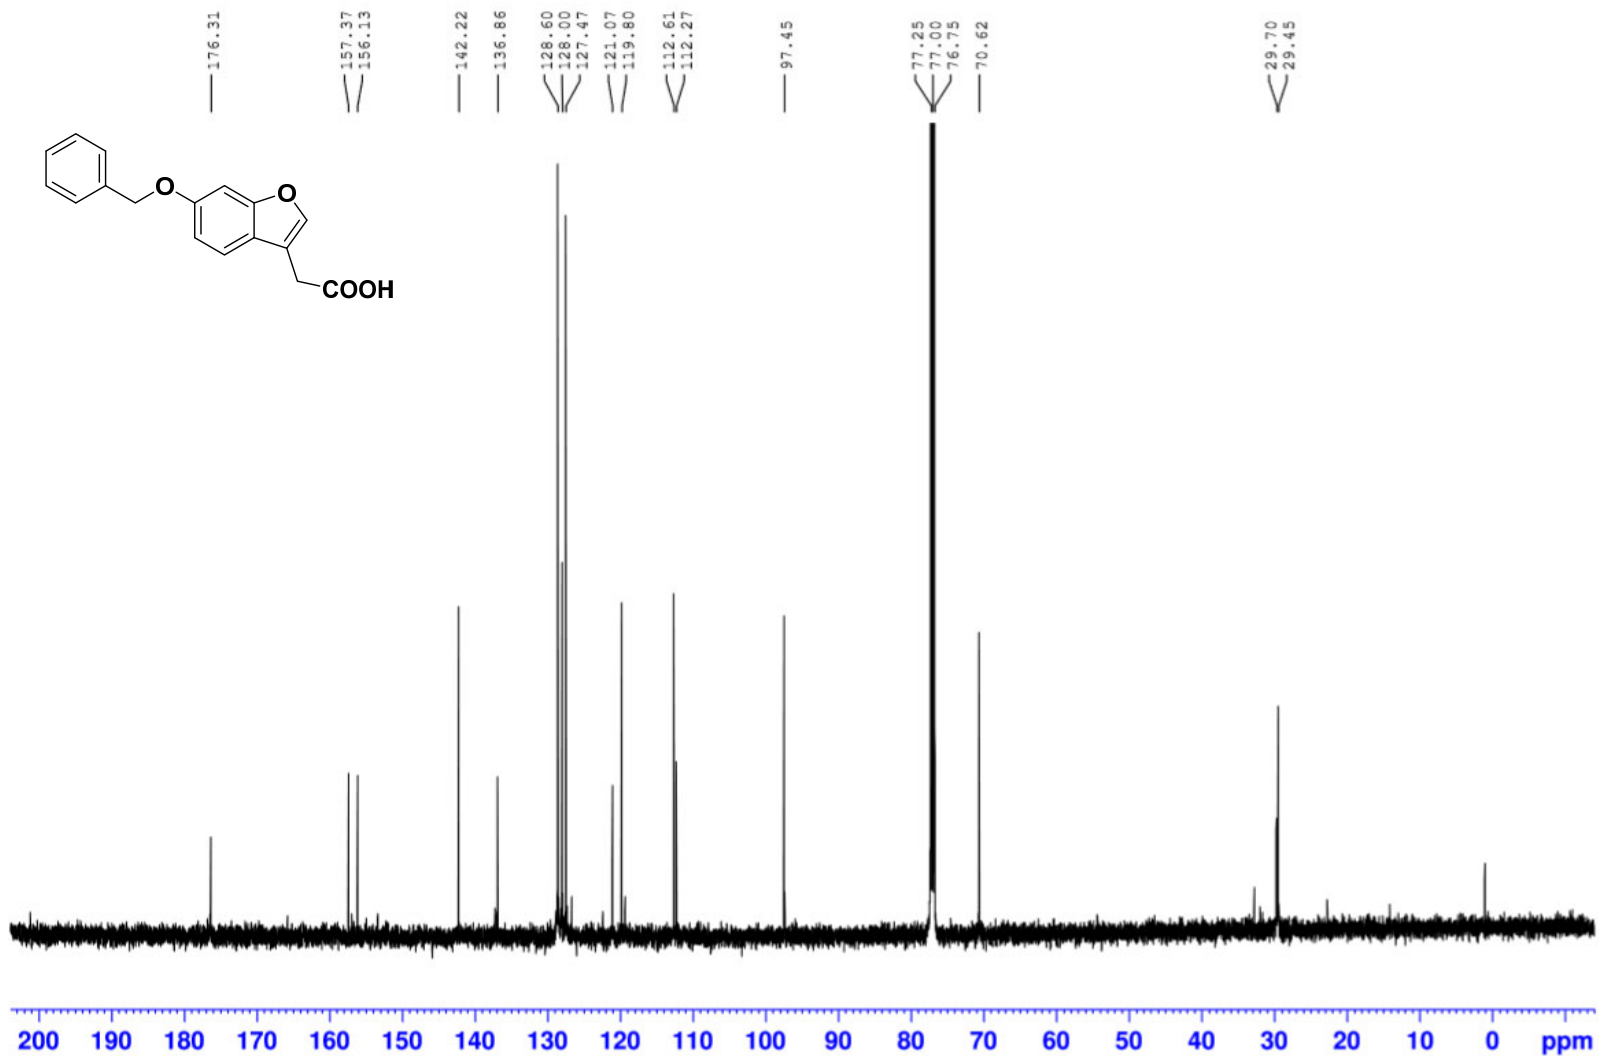

<sup>1</sup>H-NMR (400 MHz, CDCl<sub>3</sub>) of 2-(5-(Benzyloxy)benzofuran-3-yl)acetic acid, 24

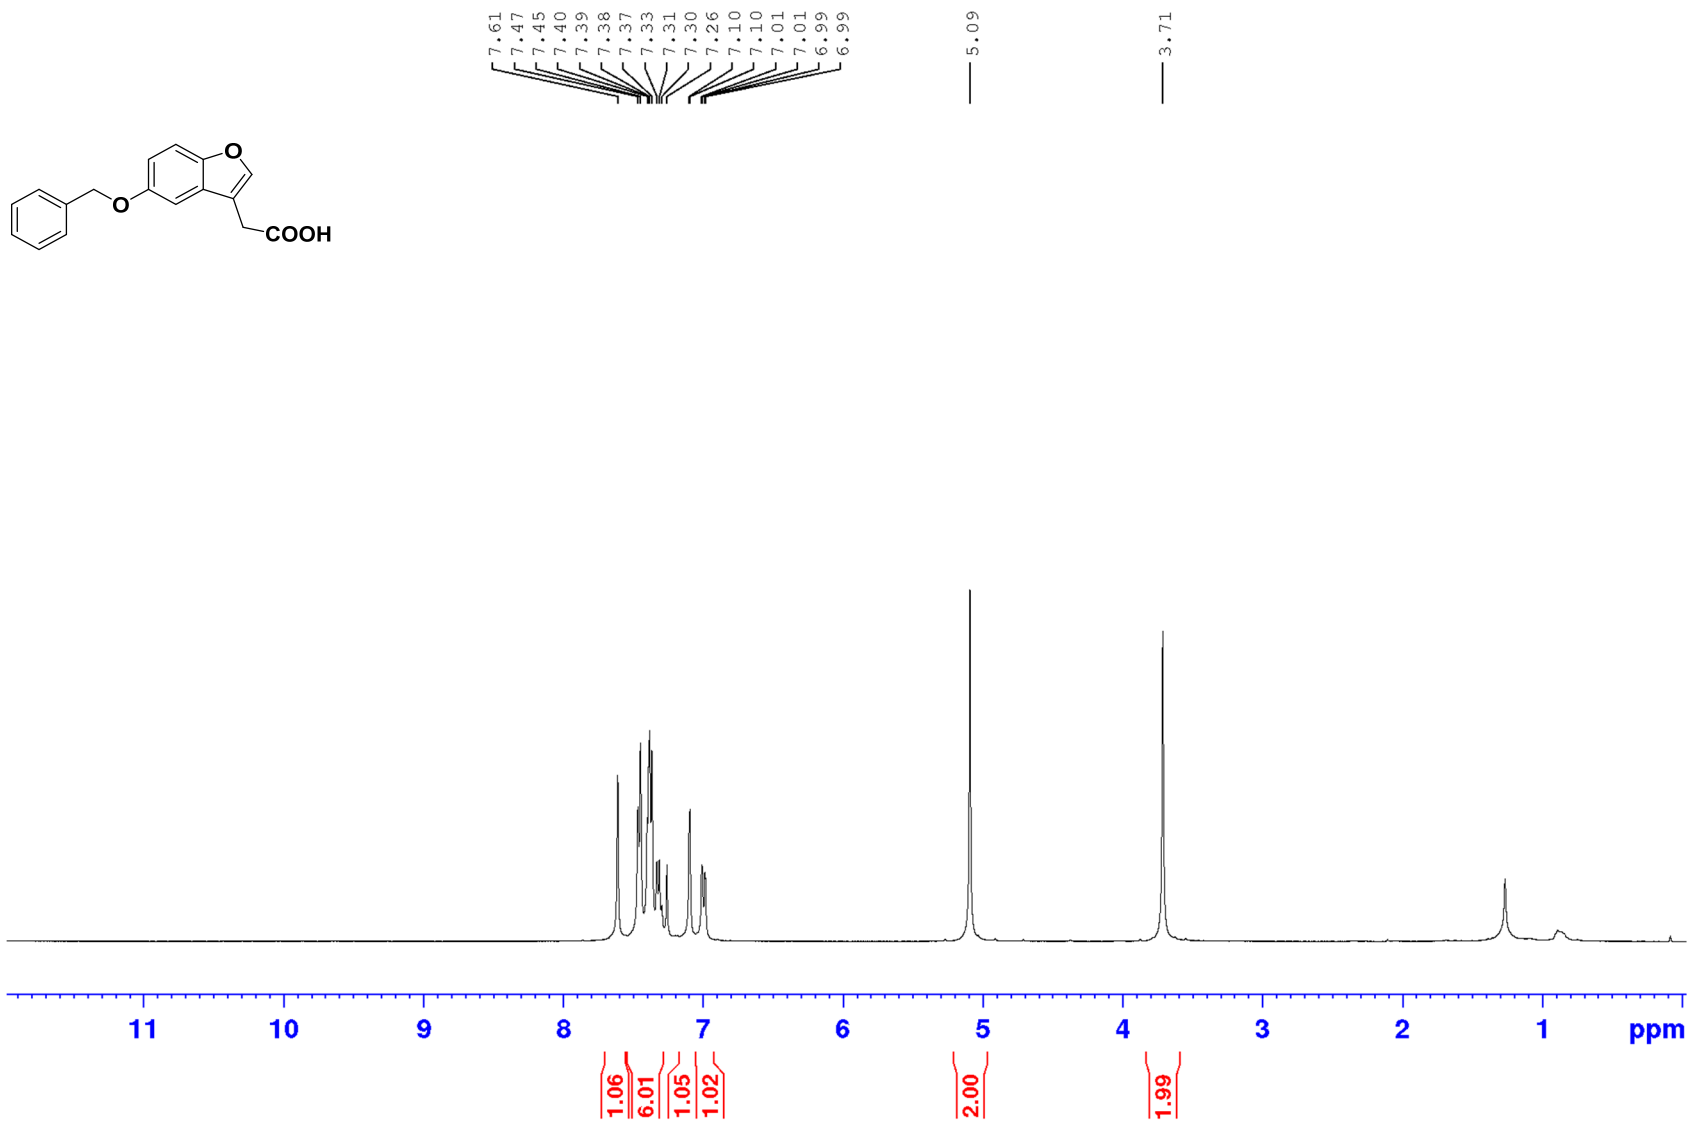

<sup>13</sup>C-NMR (100 MHz, CDCl<sub>3</sub>) of 2-(5-(Benzyloxy)benzofuran-3-yl)acetic acid, 24

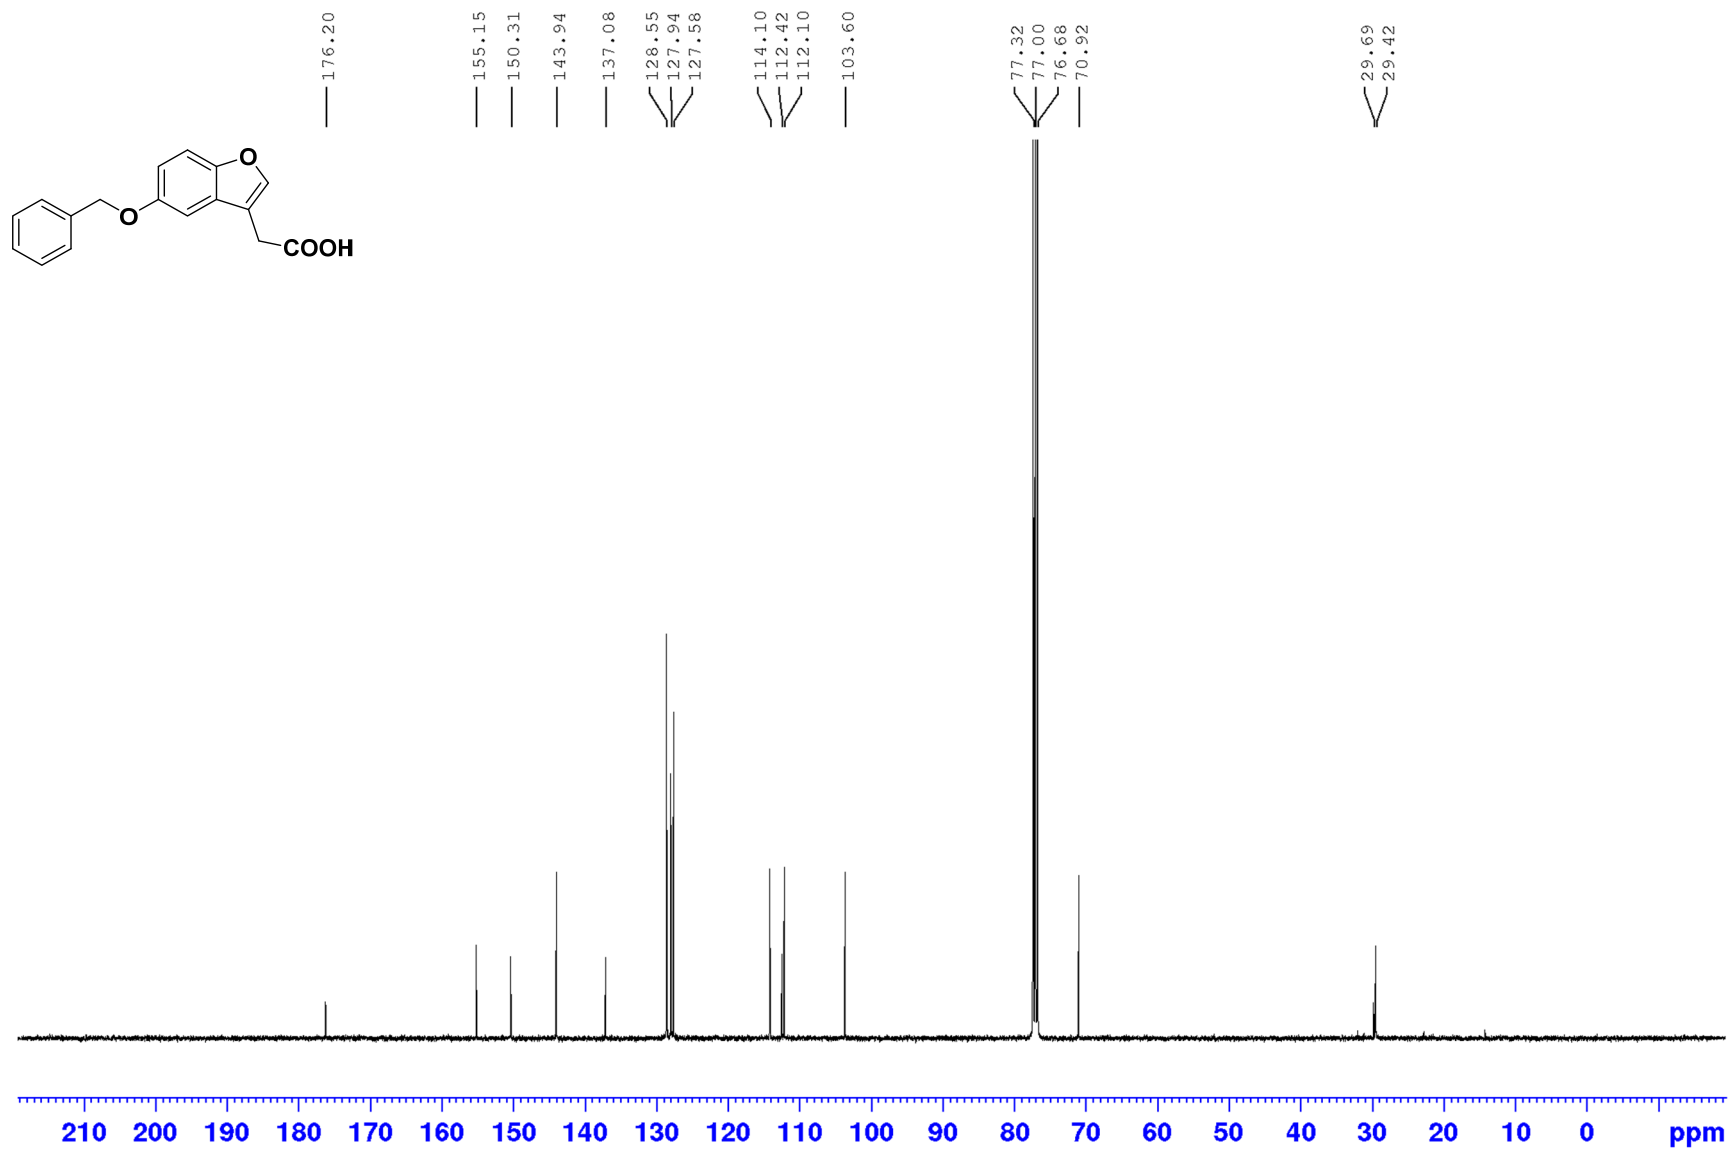

H-NMR (400 MHz, CDCl<sub>3</sub>) of 2-(6-Phenoxybenzofuran-3-yl)acetic acid, 25

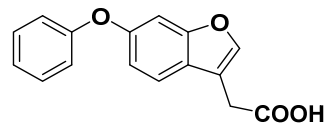

7.60  
7.51  
7.49  
7.36  
7.36  
7.35  
7.35  
7.34  
7.34  
7.33  
7.32  
7.32  
7.31  
7.26  
7.13  
7.13  
7.11  
7.09  
7.09  
7.09  
7.03  
7.03  
7.03  
7.02  
7.02  
7.01  
7.01  
7.01  
7.00  
7.00

3.75  
3.75

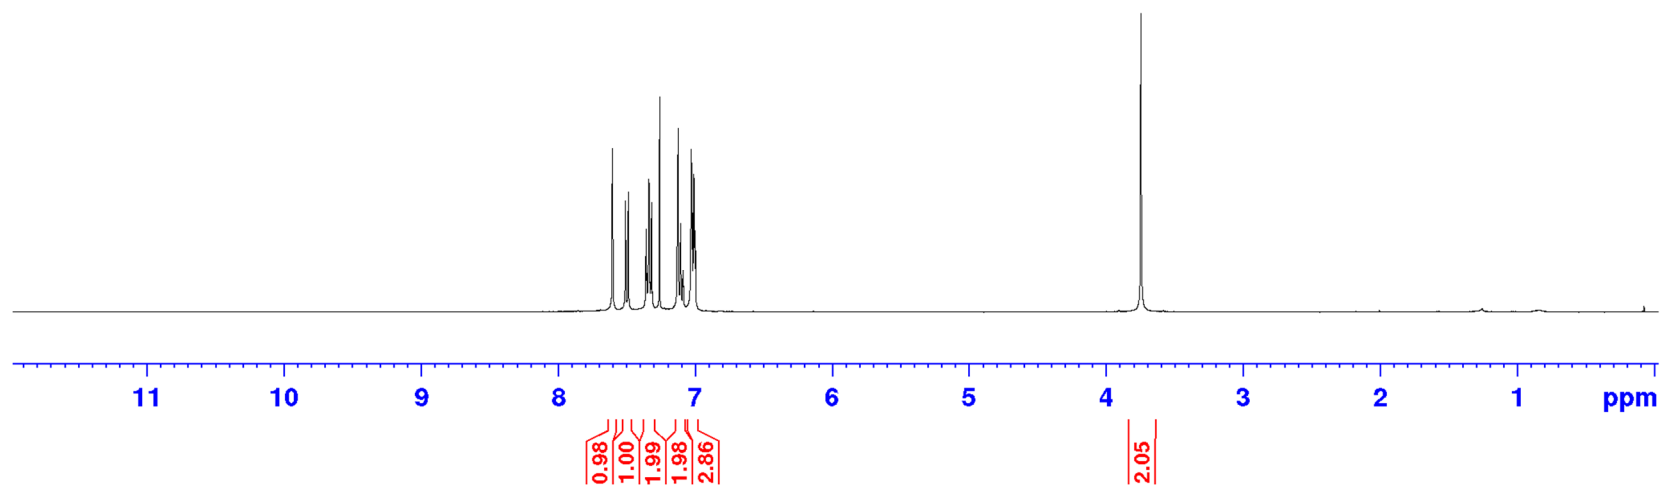



<sup>13</sup>C-NMR (100 MHz, CDCl<sub>3</sub>) of 2-(6-Phenoxybenzofuran-3-yl)acetic acid, 25

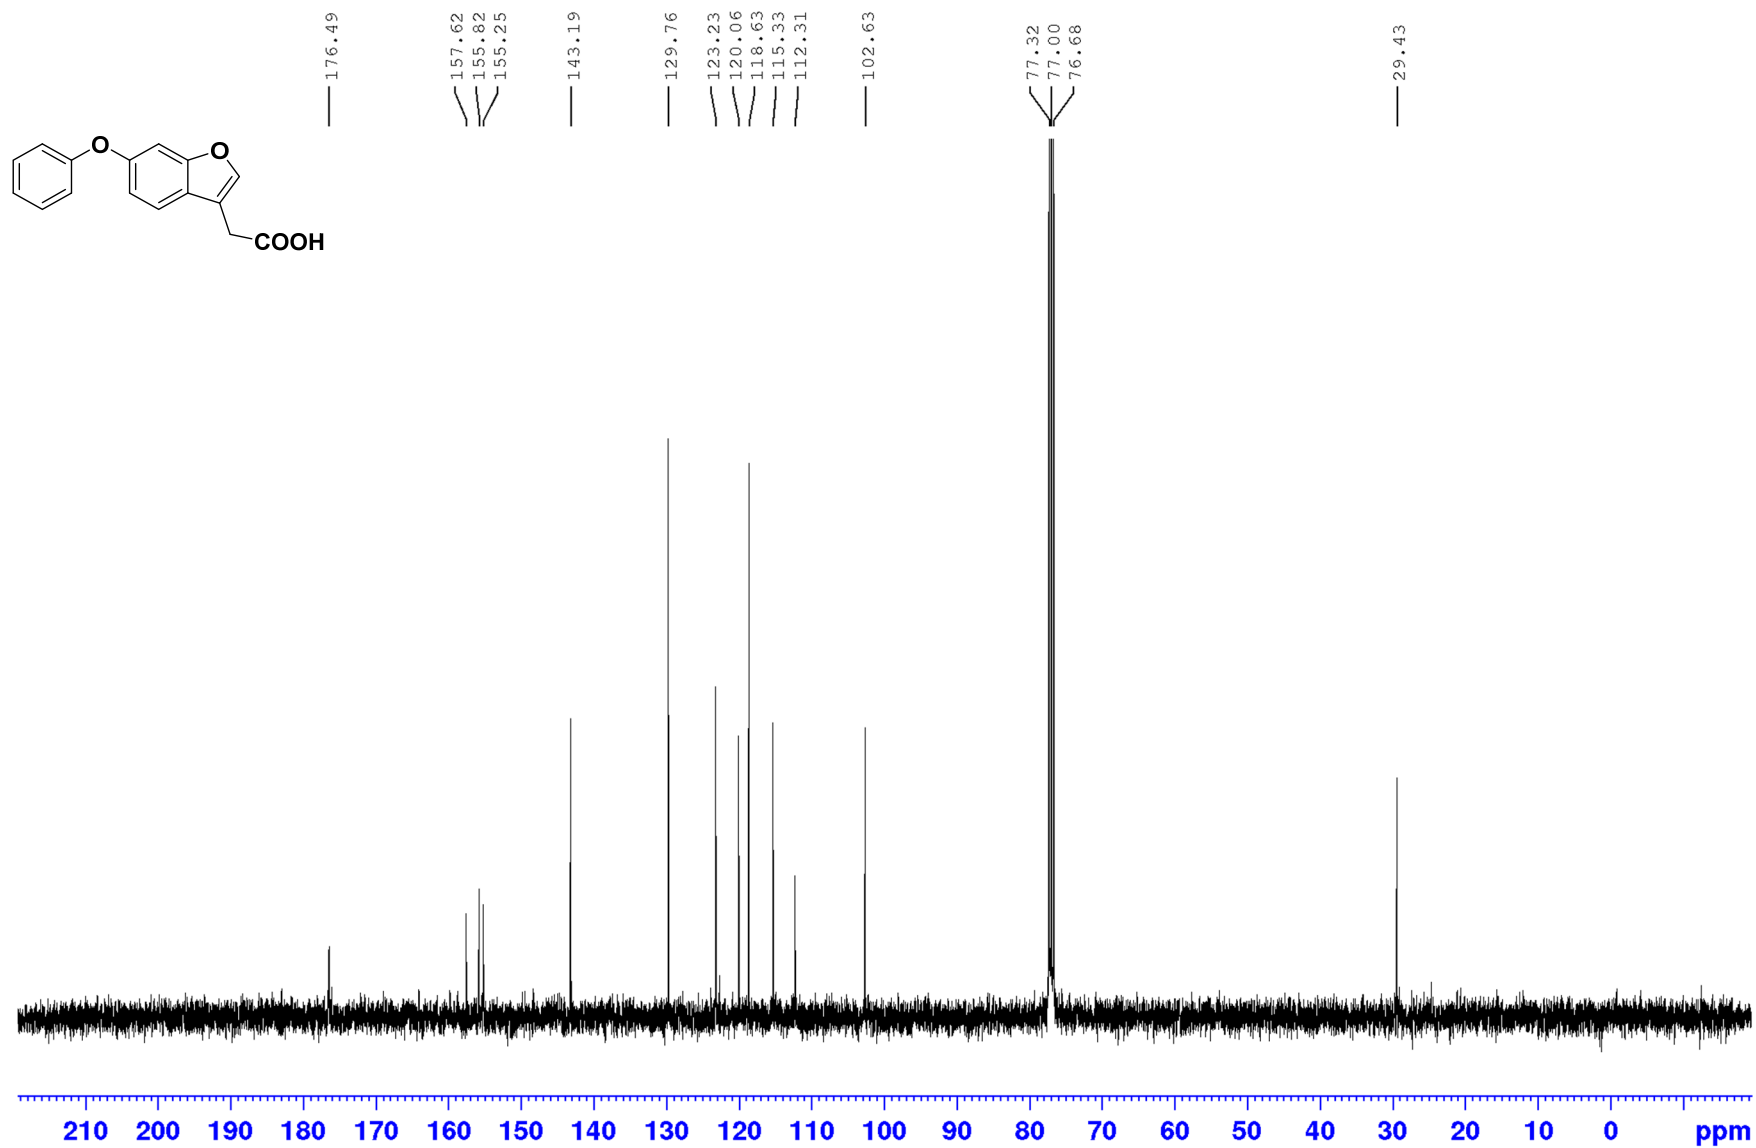

<sup>1</sup>H-NMR (400 MHz, CDCl<sub>3</sub>) of 2-(6-(3-Methoxyphenoxy)benzofuran-3-yl)acetic acid, 26

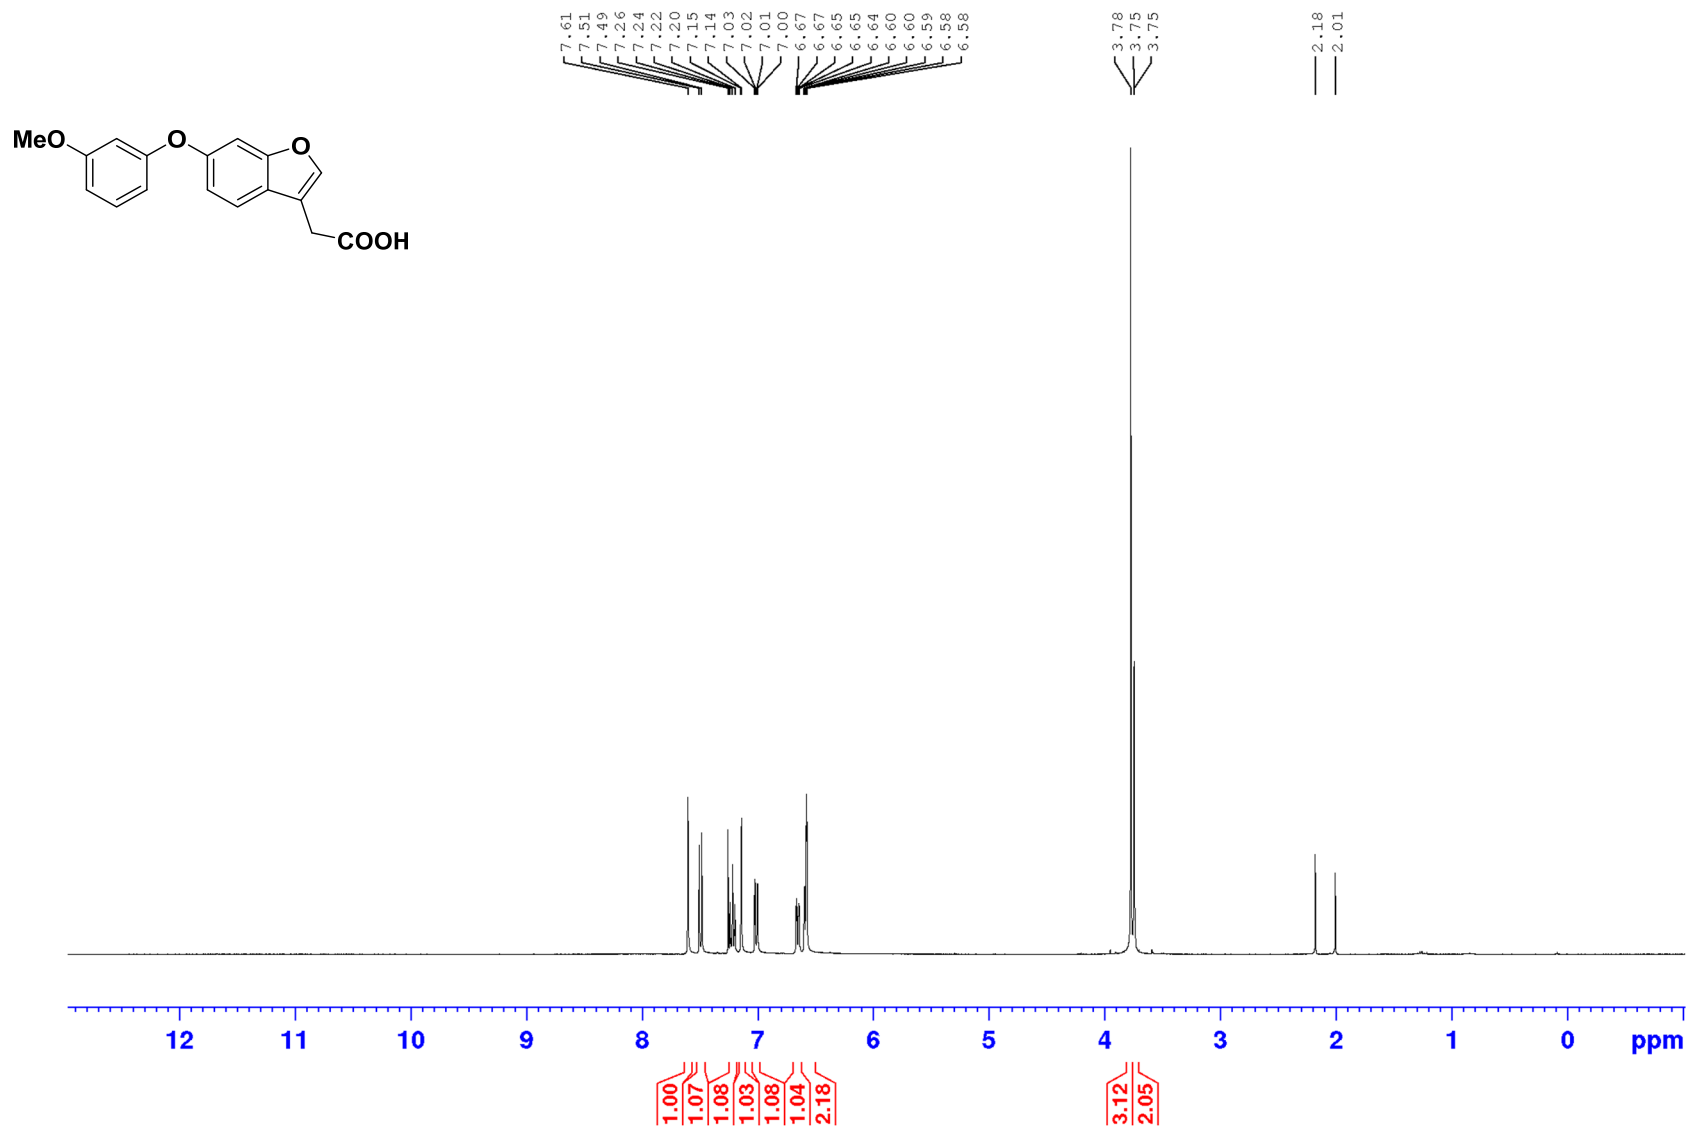

<sup>13</sup>C-NMR (100 MHz, CDCl<sub>3</sub>) of 2-(6-(3-Methoxyphenoxy)benzofuran-3-yl)acetic acid, 26

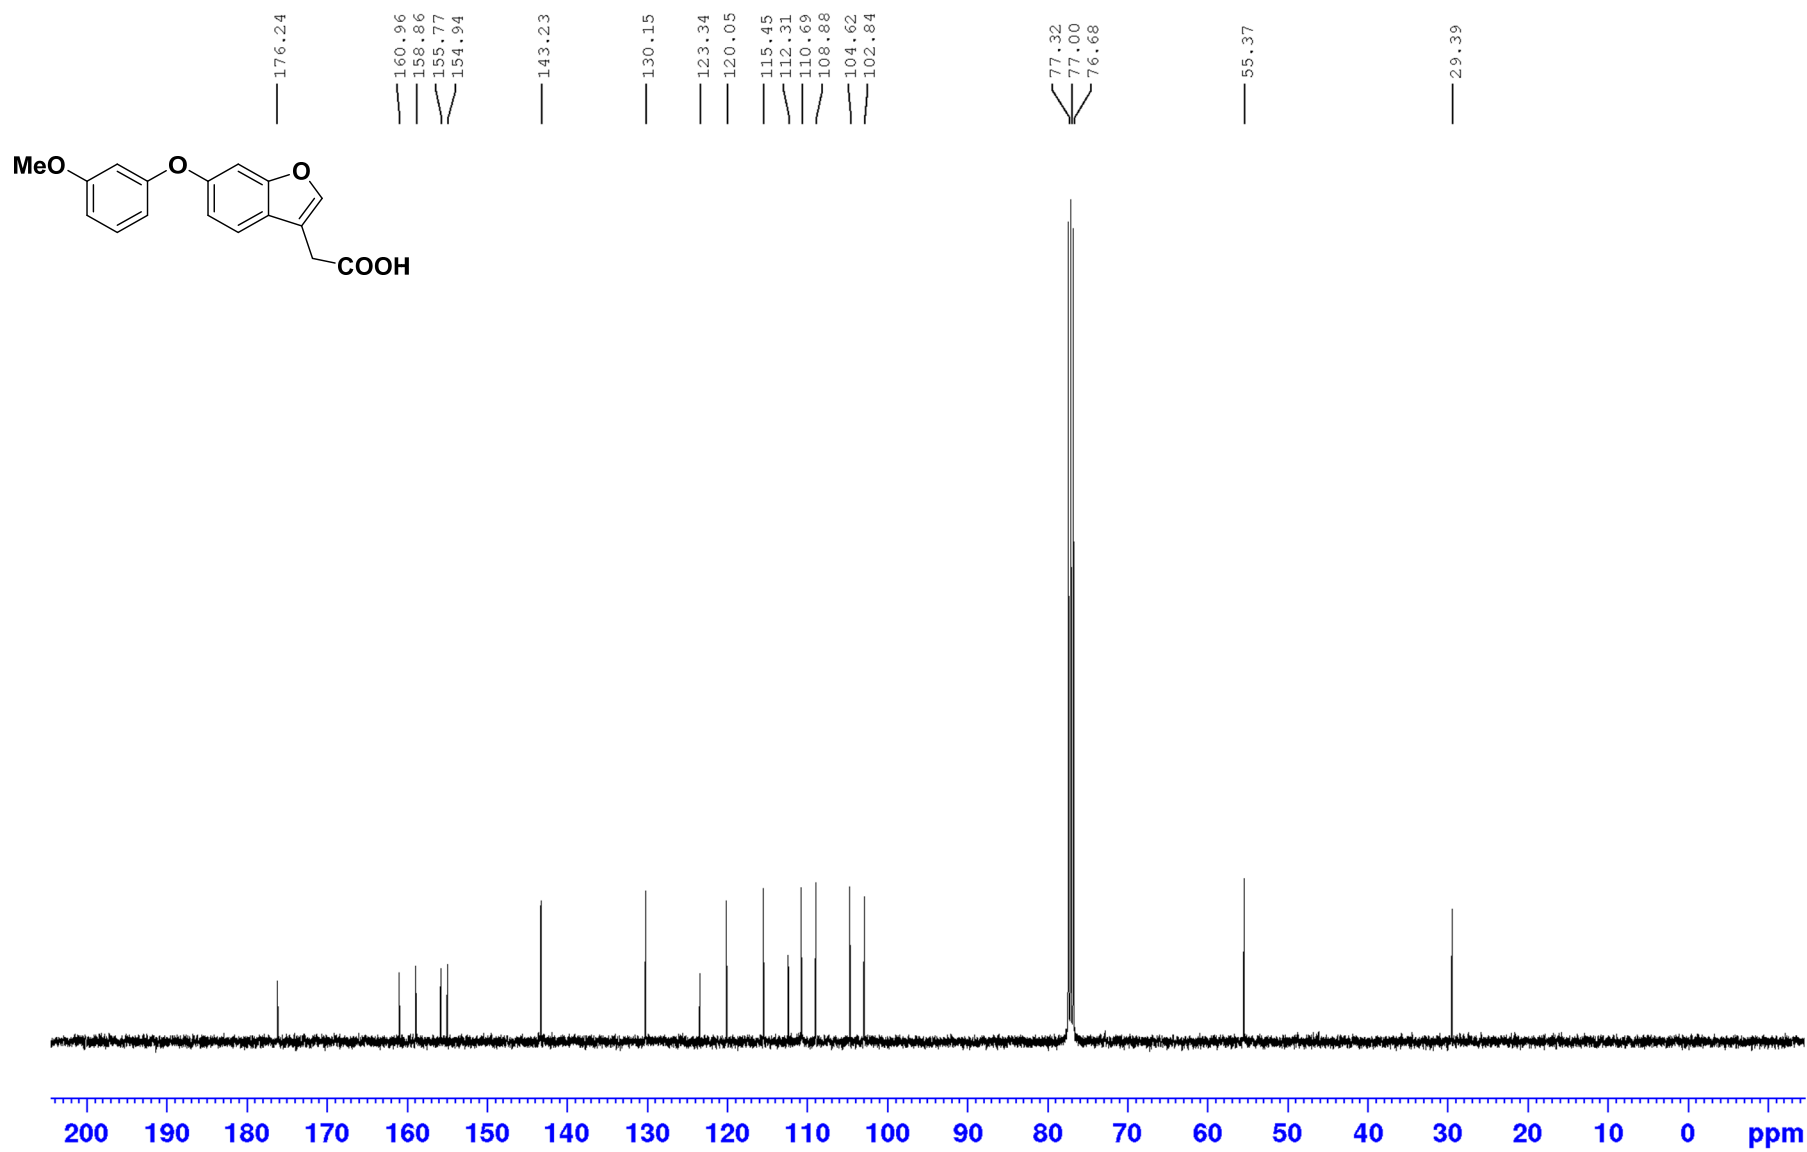

<sup>1</sup>H-NMR (400 MHz, CDCl<sub>3</sub>) of **Methyl 2-(6-benzylbenzofuran-3-yl)acetate, 27**

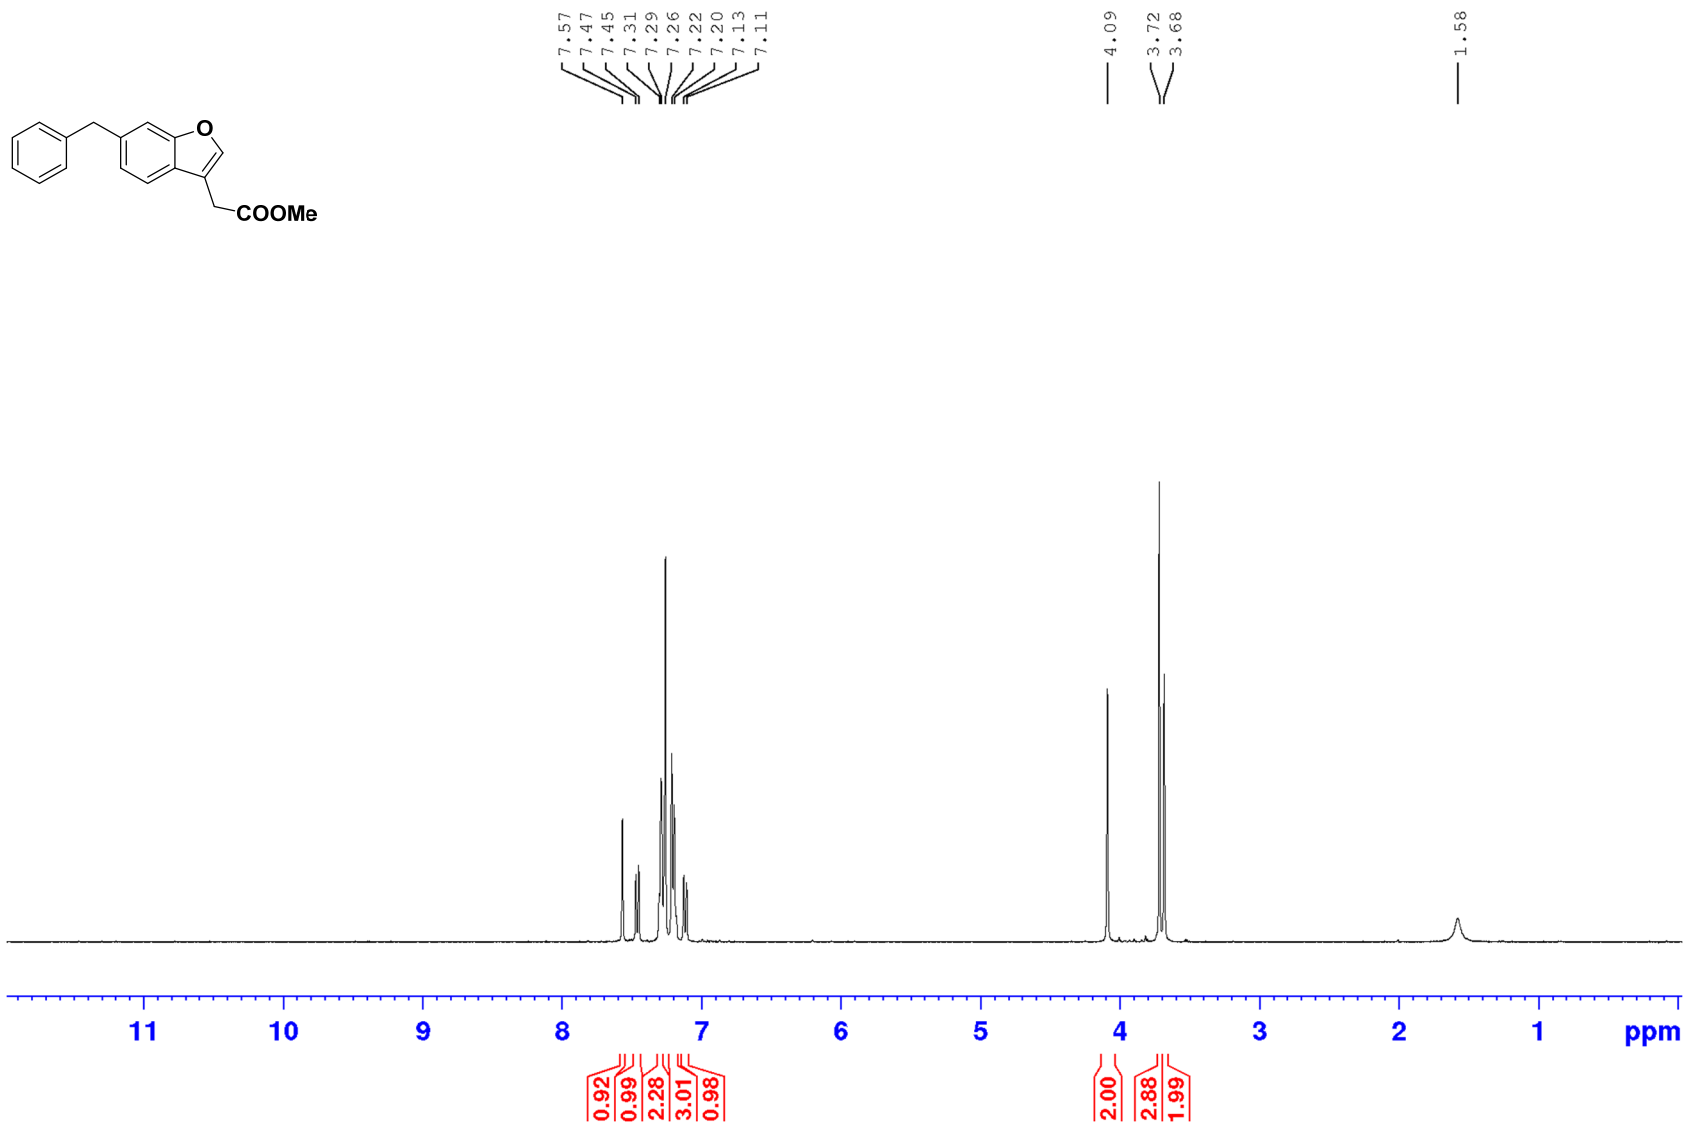

<sup>13</sup>C-NMR (100 MHz, CDCl<sub>3</sub>) of Methyl 2-(6-benzylbenzofuran-3-yl)acetate, 27

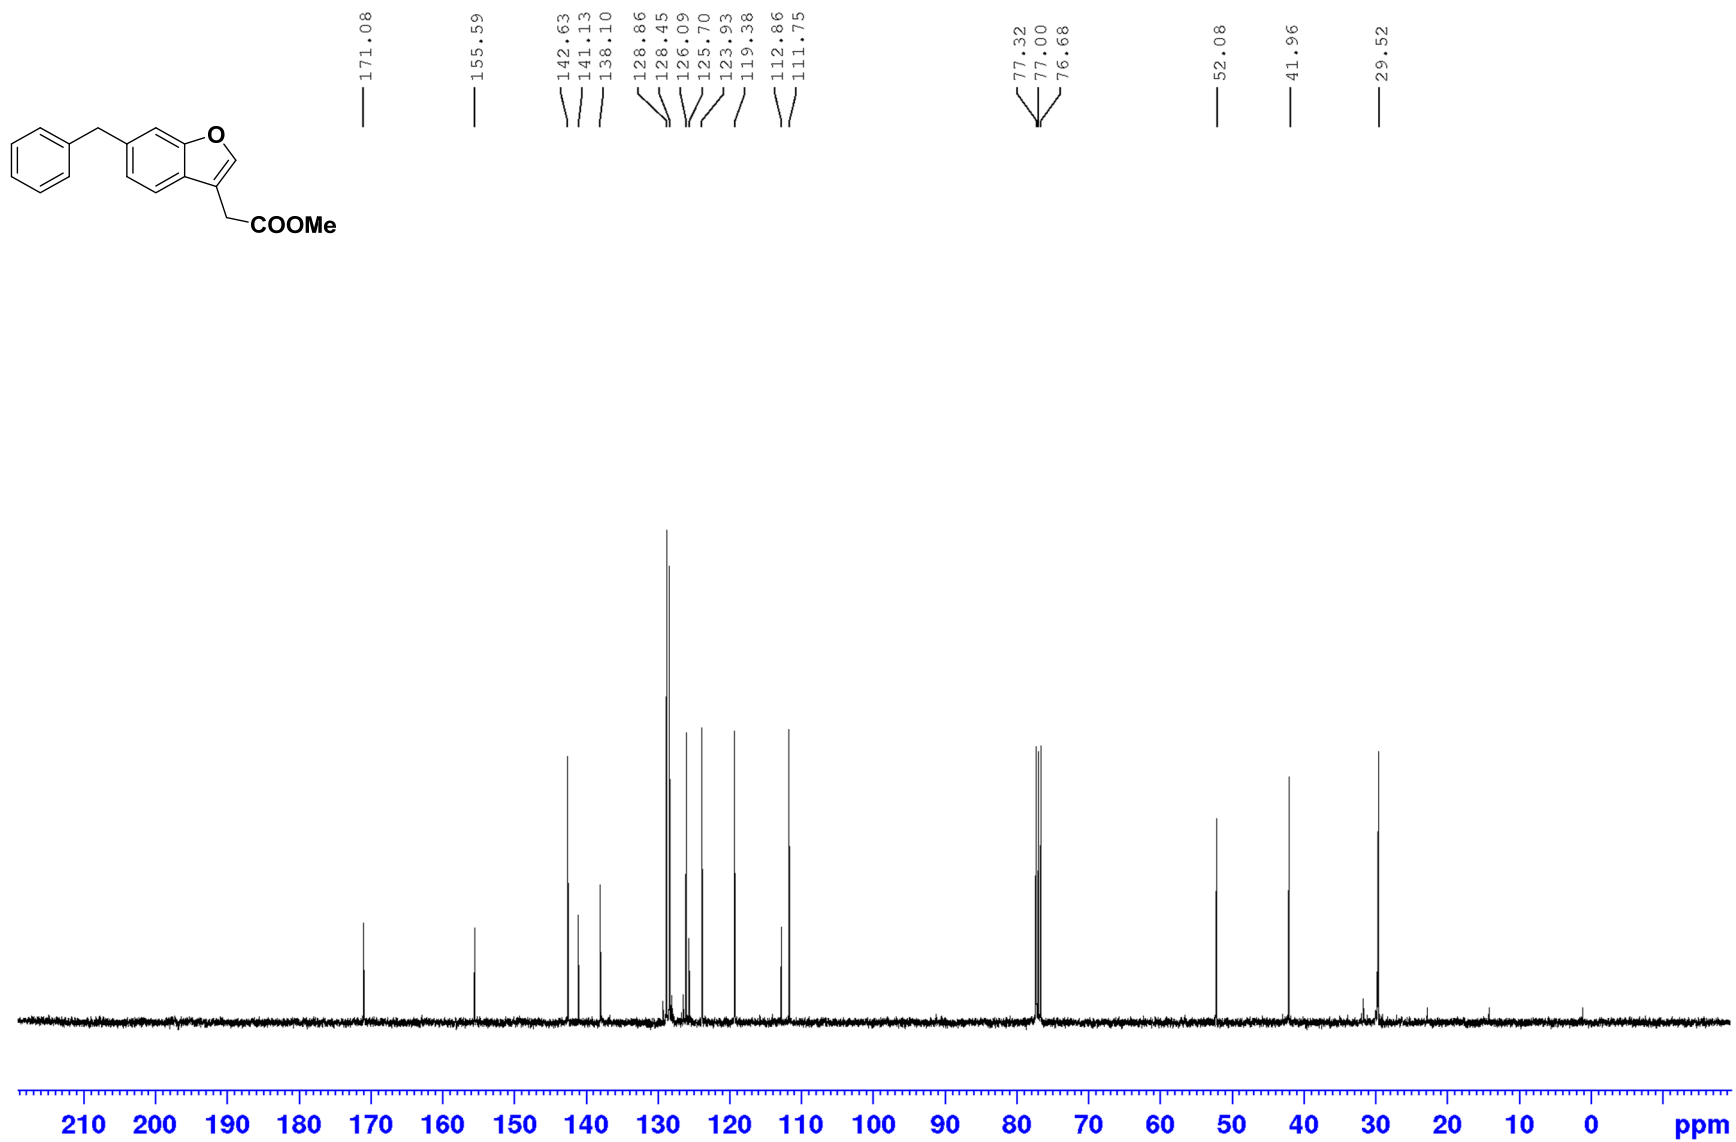

<sup>1</sup>H-NMR (400 MHz, CDCl<sub>3</sub>) of 2-(6-Benzylbenzofuran-3-yl)acetic acid, 28

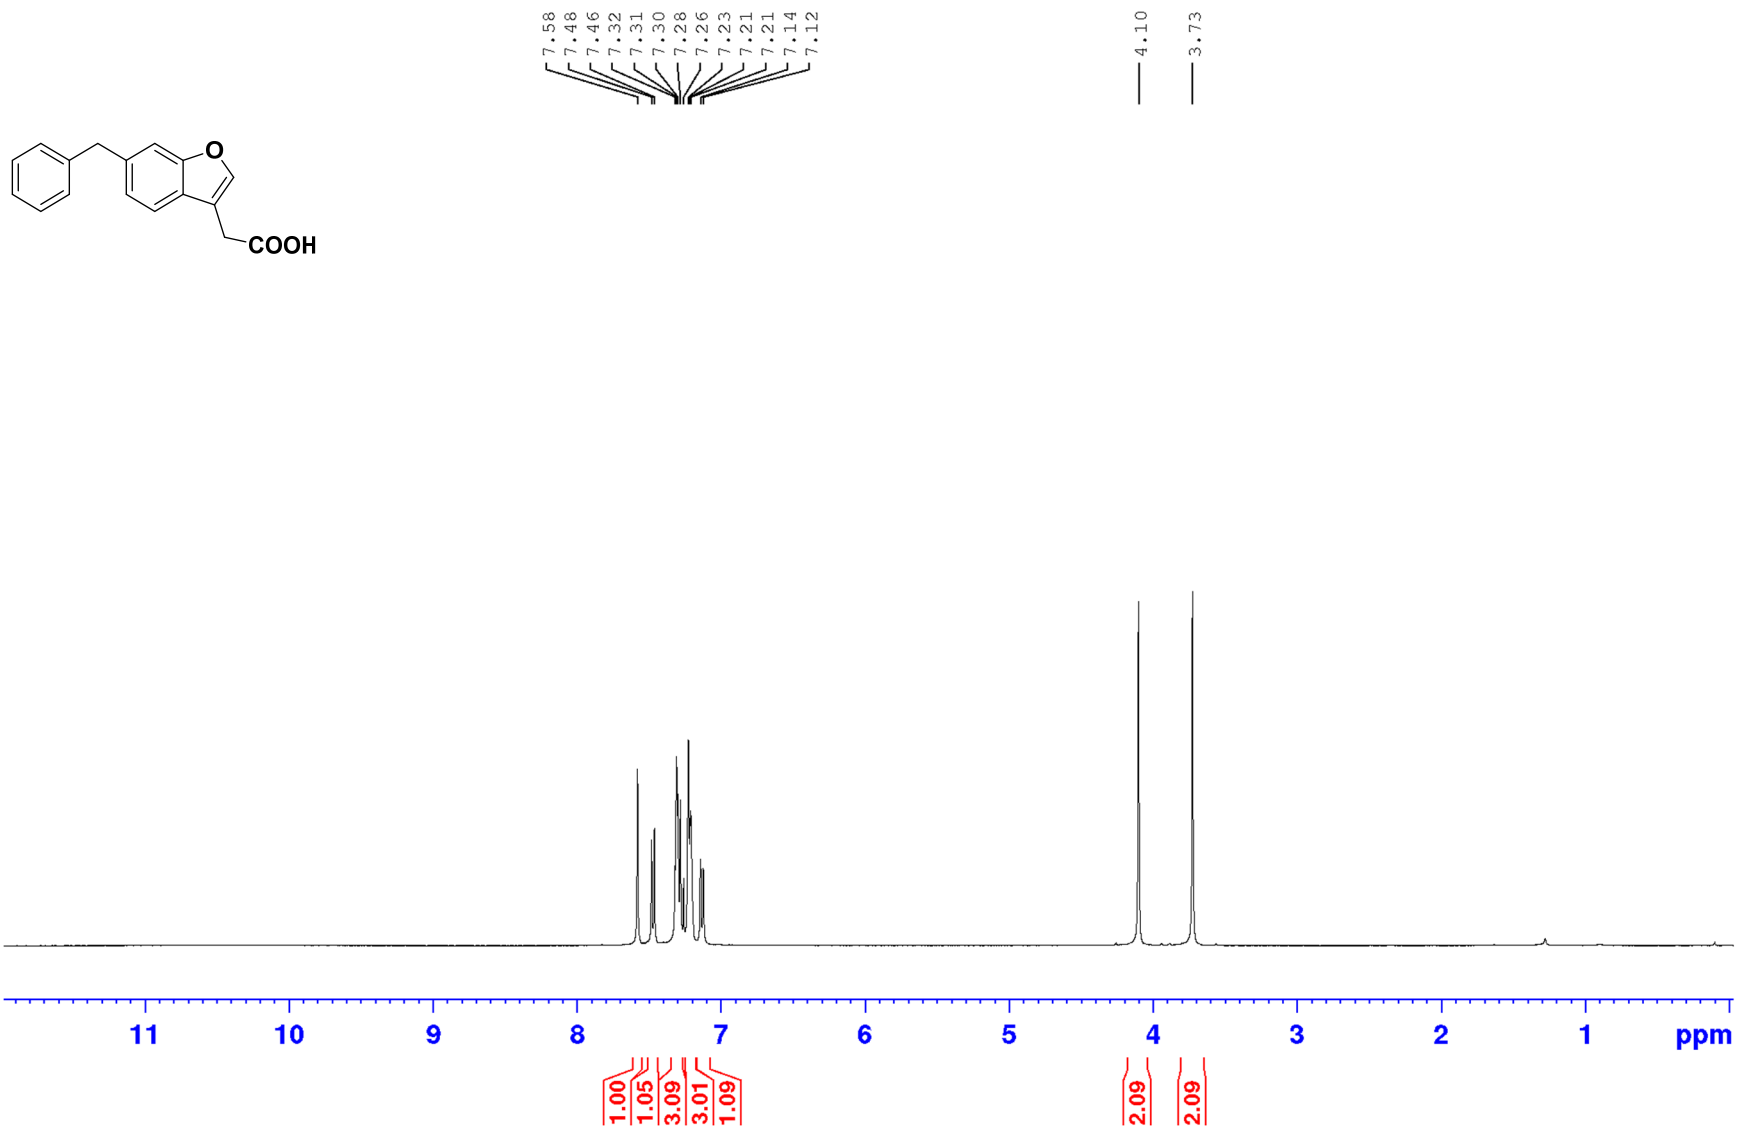

<sup>13</sup>C-NMR (100 MHz, CDCl<sub>3</sub>) of 2-(6-Benzylbenzofuran-3-yl)acetic acid, 28

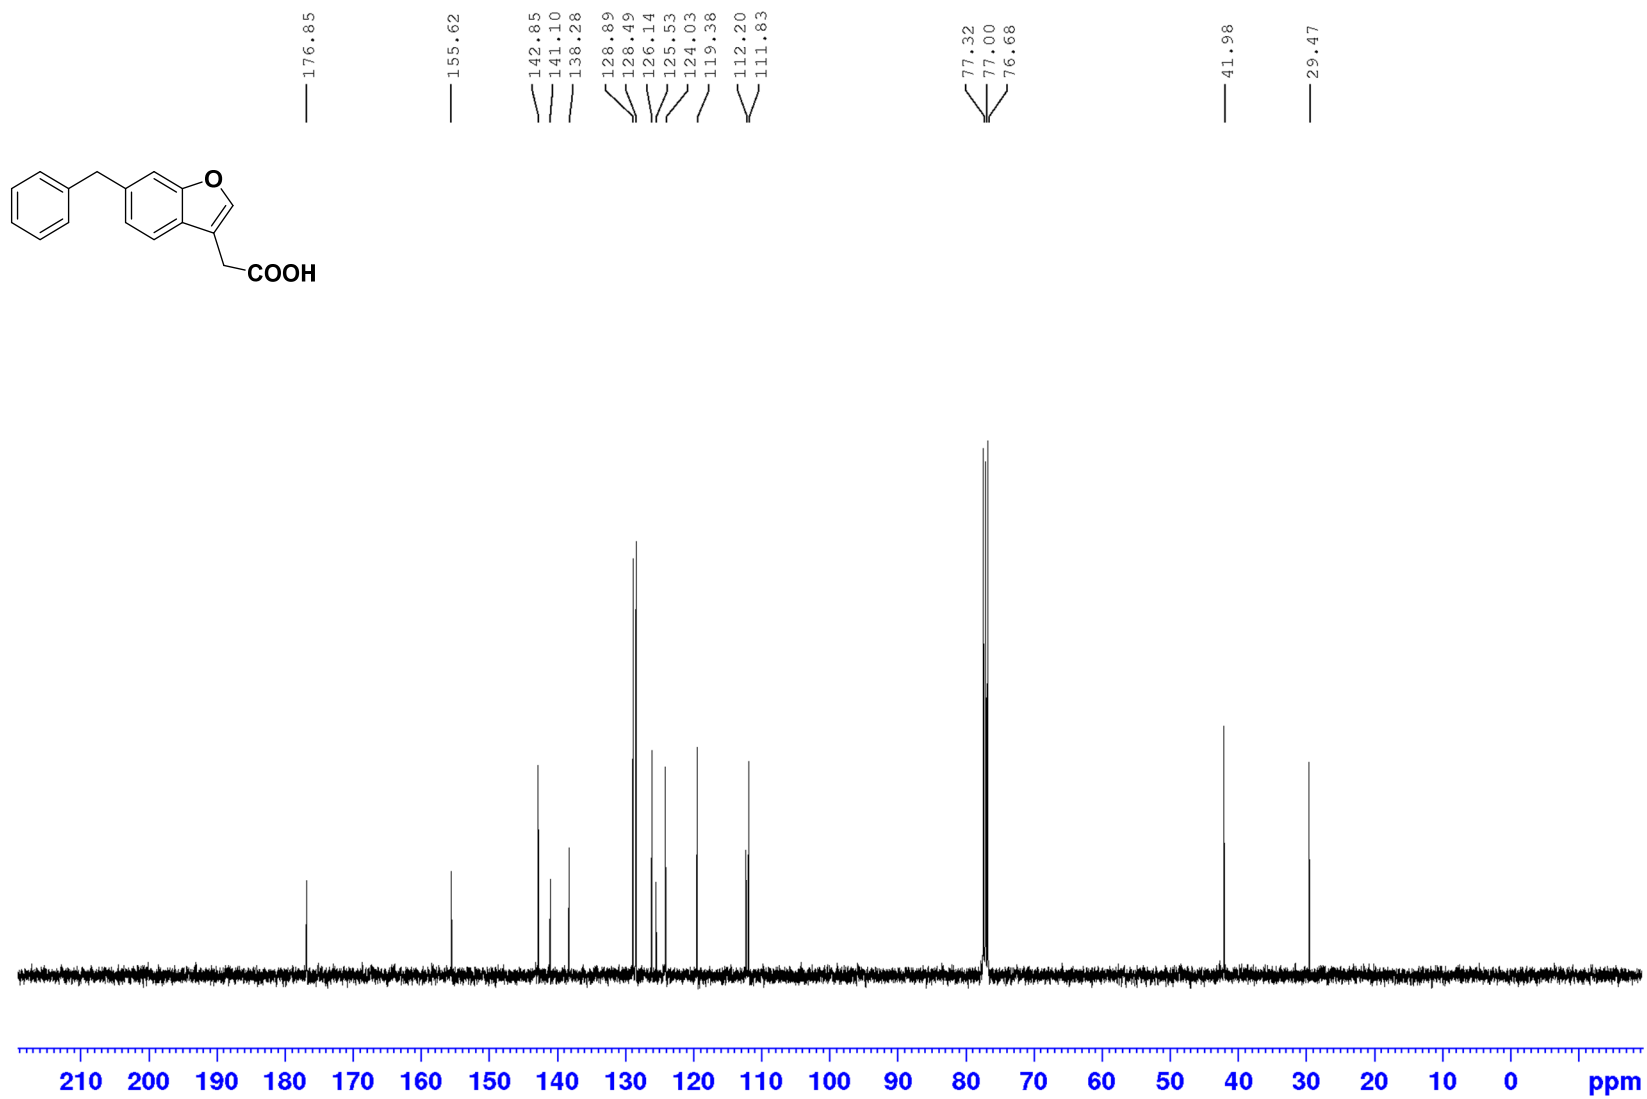

$^1\text{H-NMR}$  (400 MHz,  $\text{CDCl}_3$ ) of **2-(6-Bromobenzofuran-3-yl)acetamide, 29**

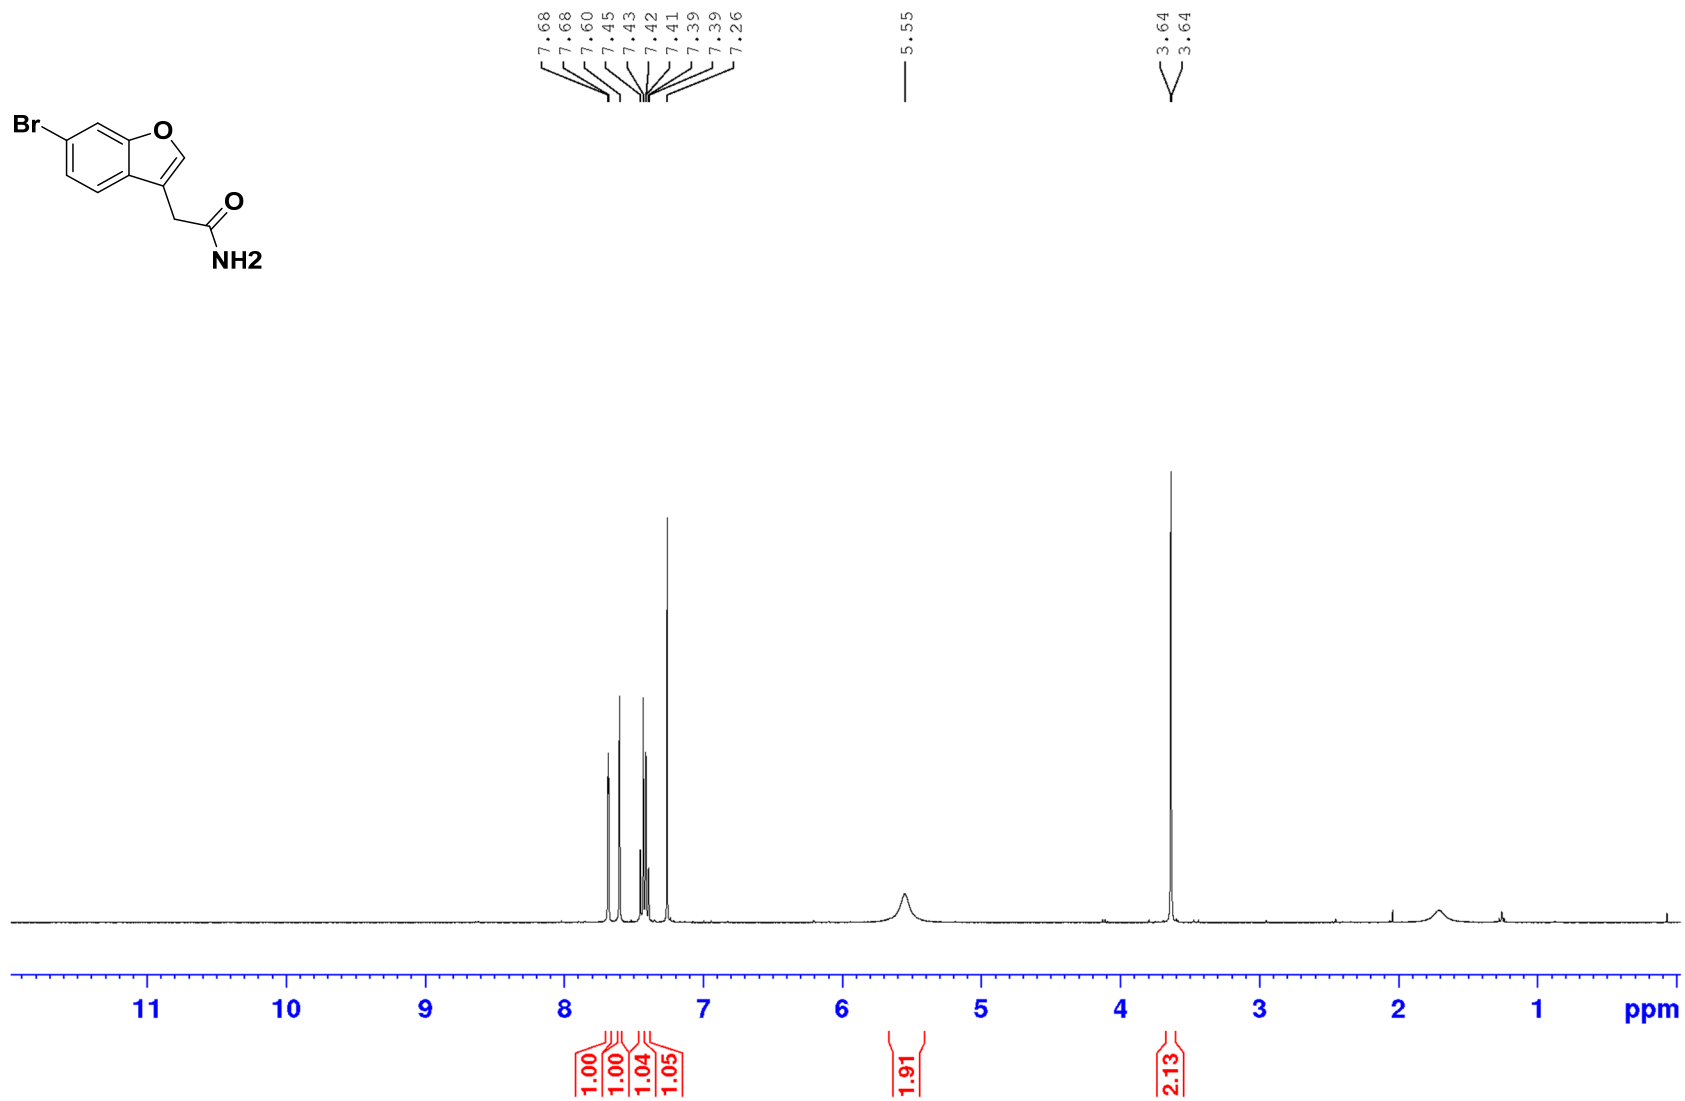



<sup>13</sup>C-NMR (100 MHz, DMSO-d<sub>6</sub>) of 2-(6-Bromobenzofuran-3-yl)acetamide, 29

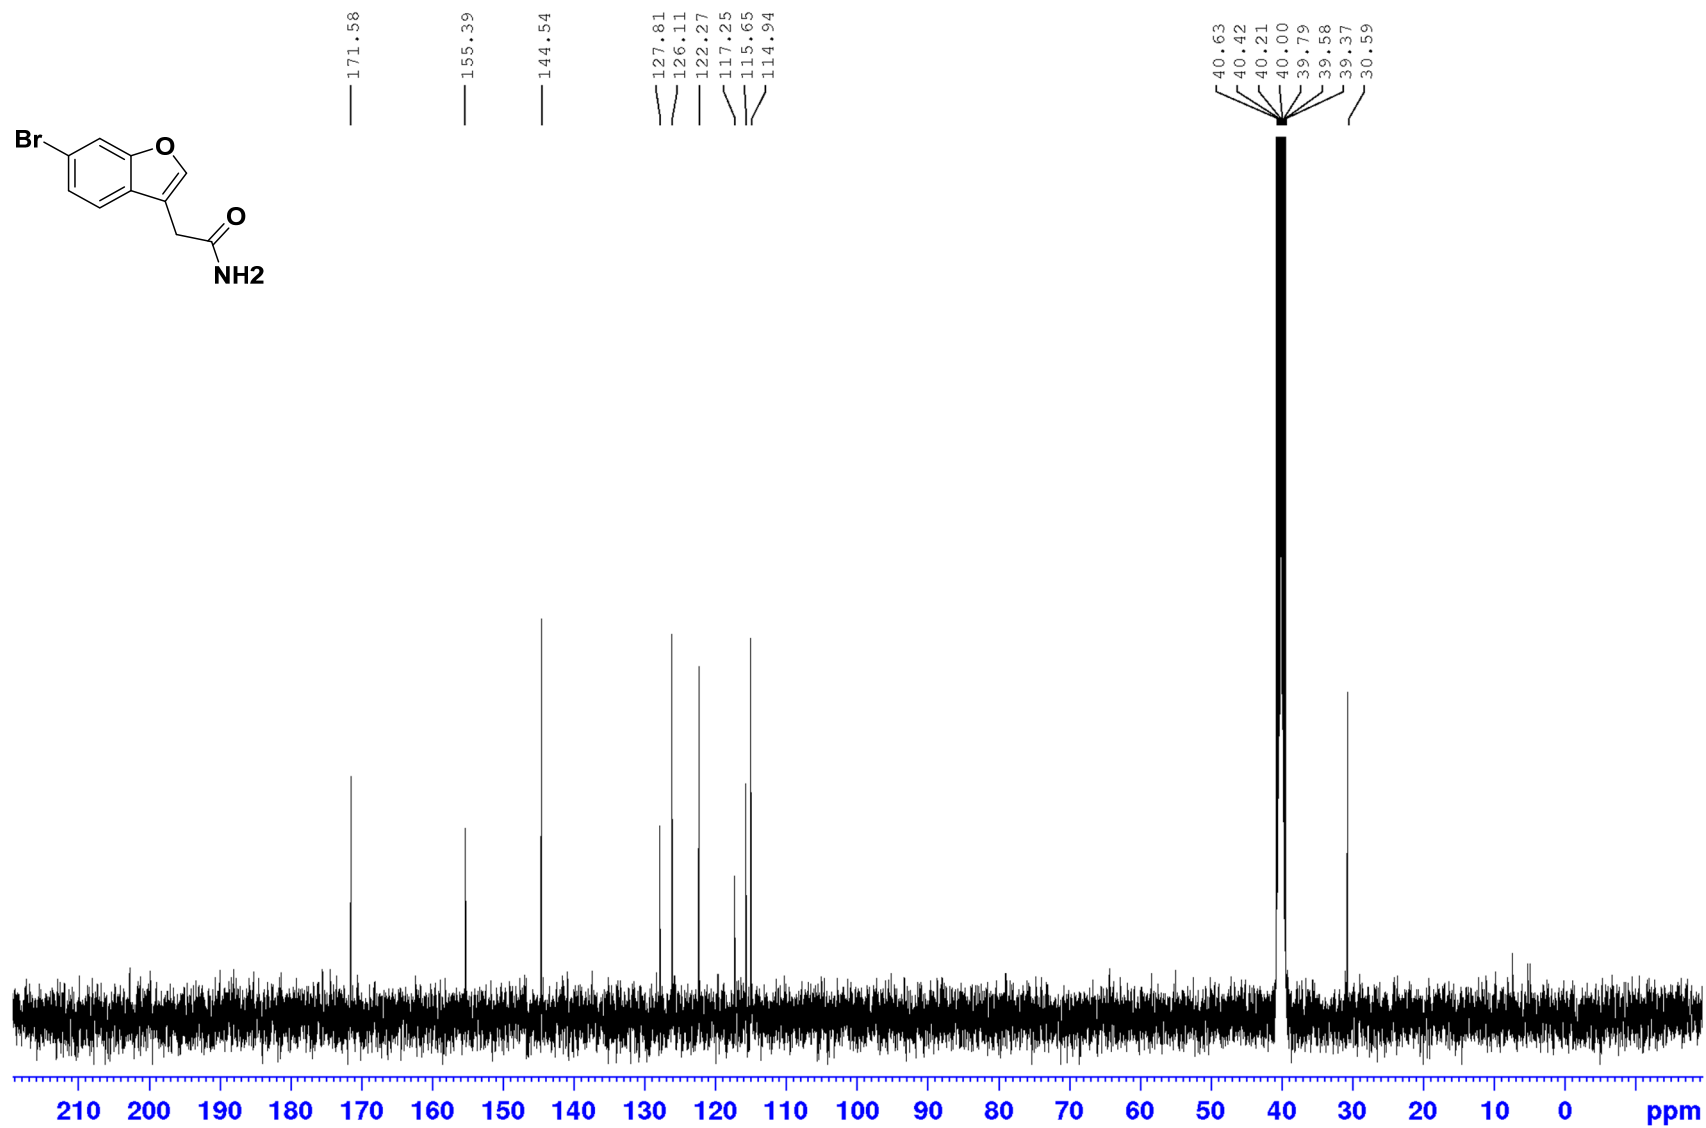

<sup>1</sup>H-NMR (400 MHz, CDCl<sub>3</sub>) of 2-(6-Bromobenzofuran-3-yl)acetonitrile, 30

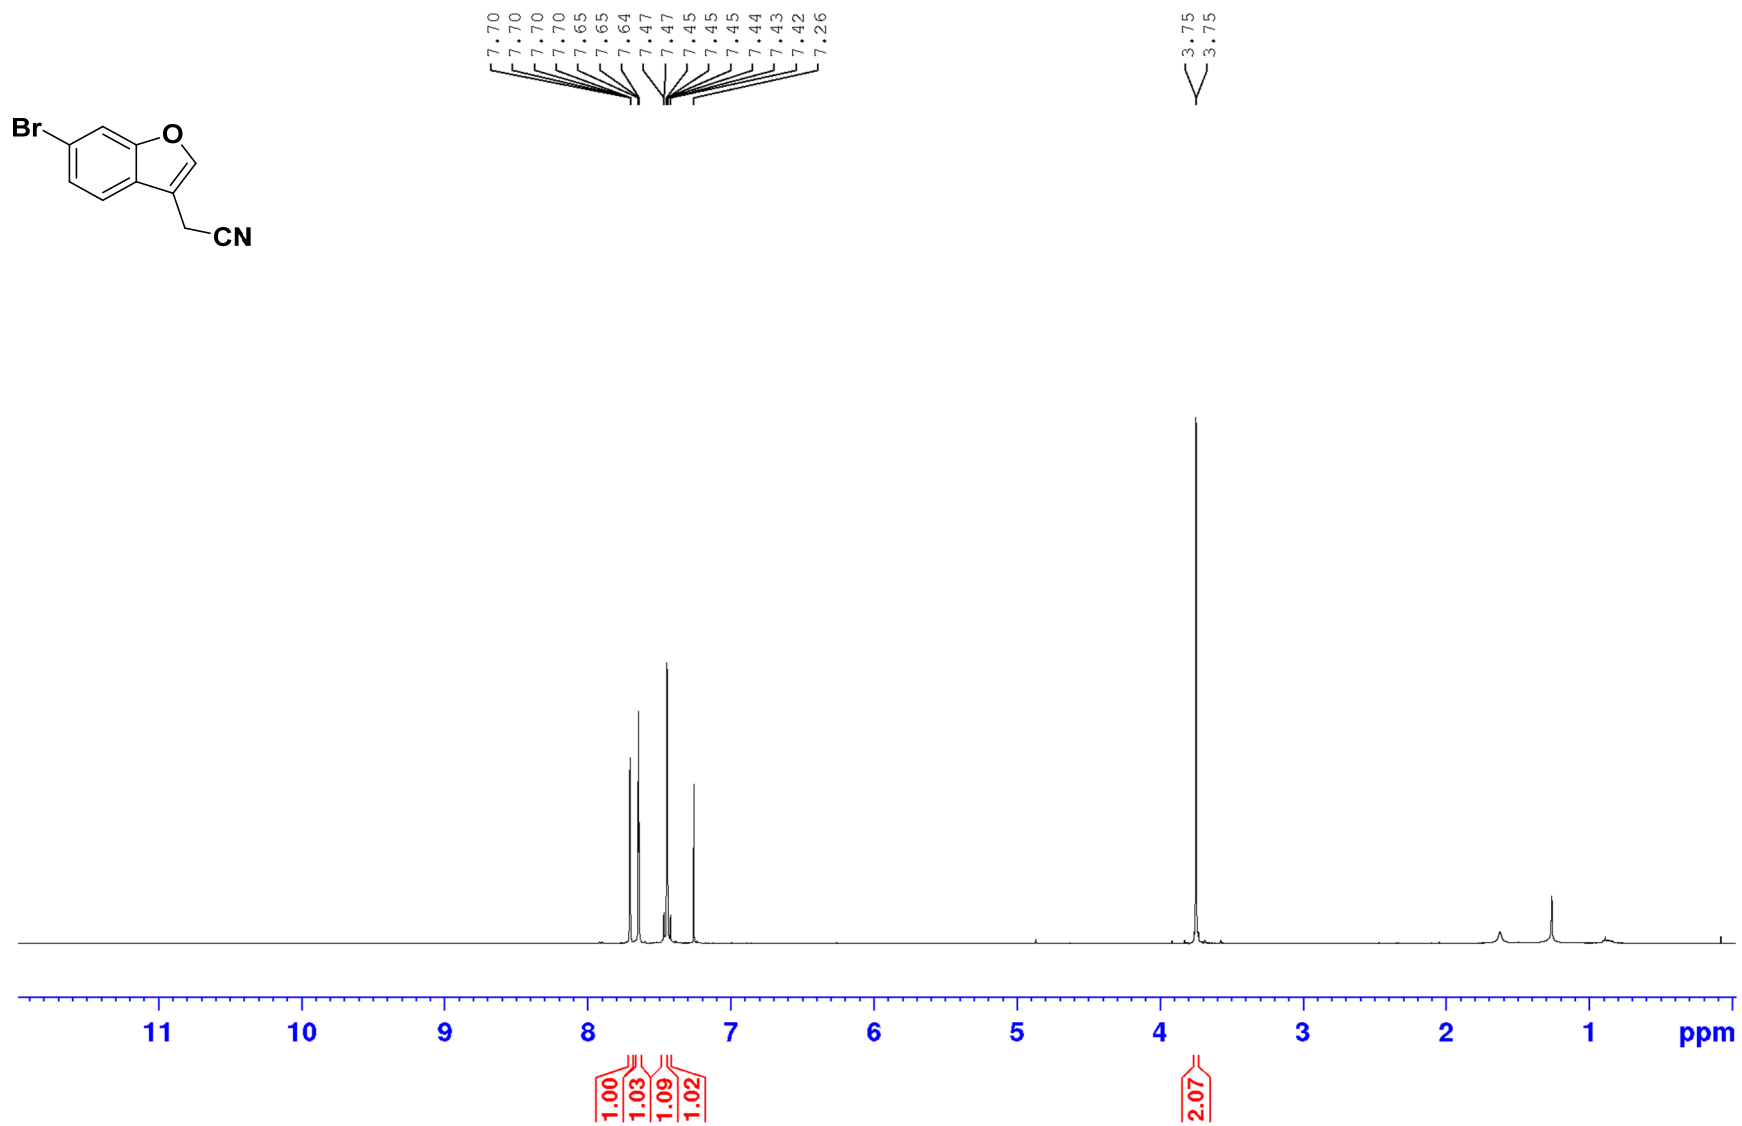

<sup>13</sup>C-NMR (100 MHz, CDCl<sub>3</sub>) of 2-(6-Bromobenzofuran-3-yl)acetonitrile, 30

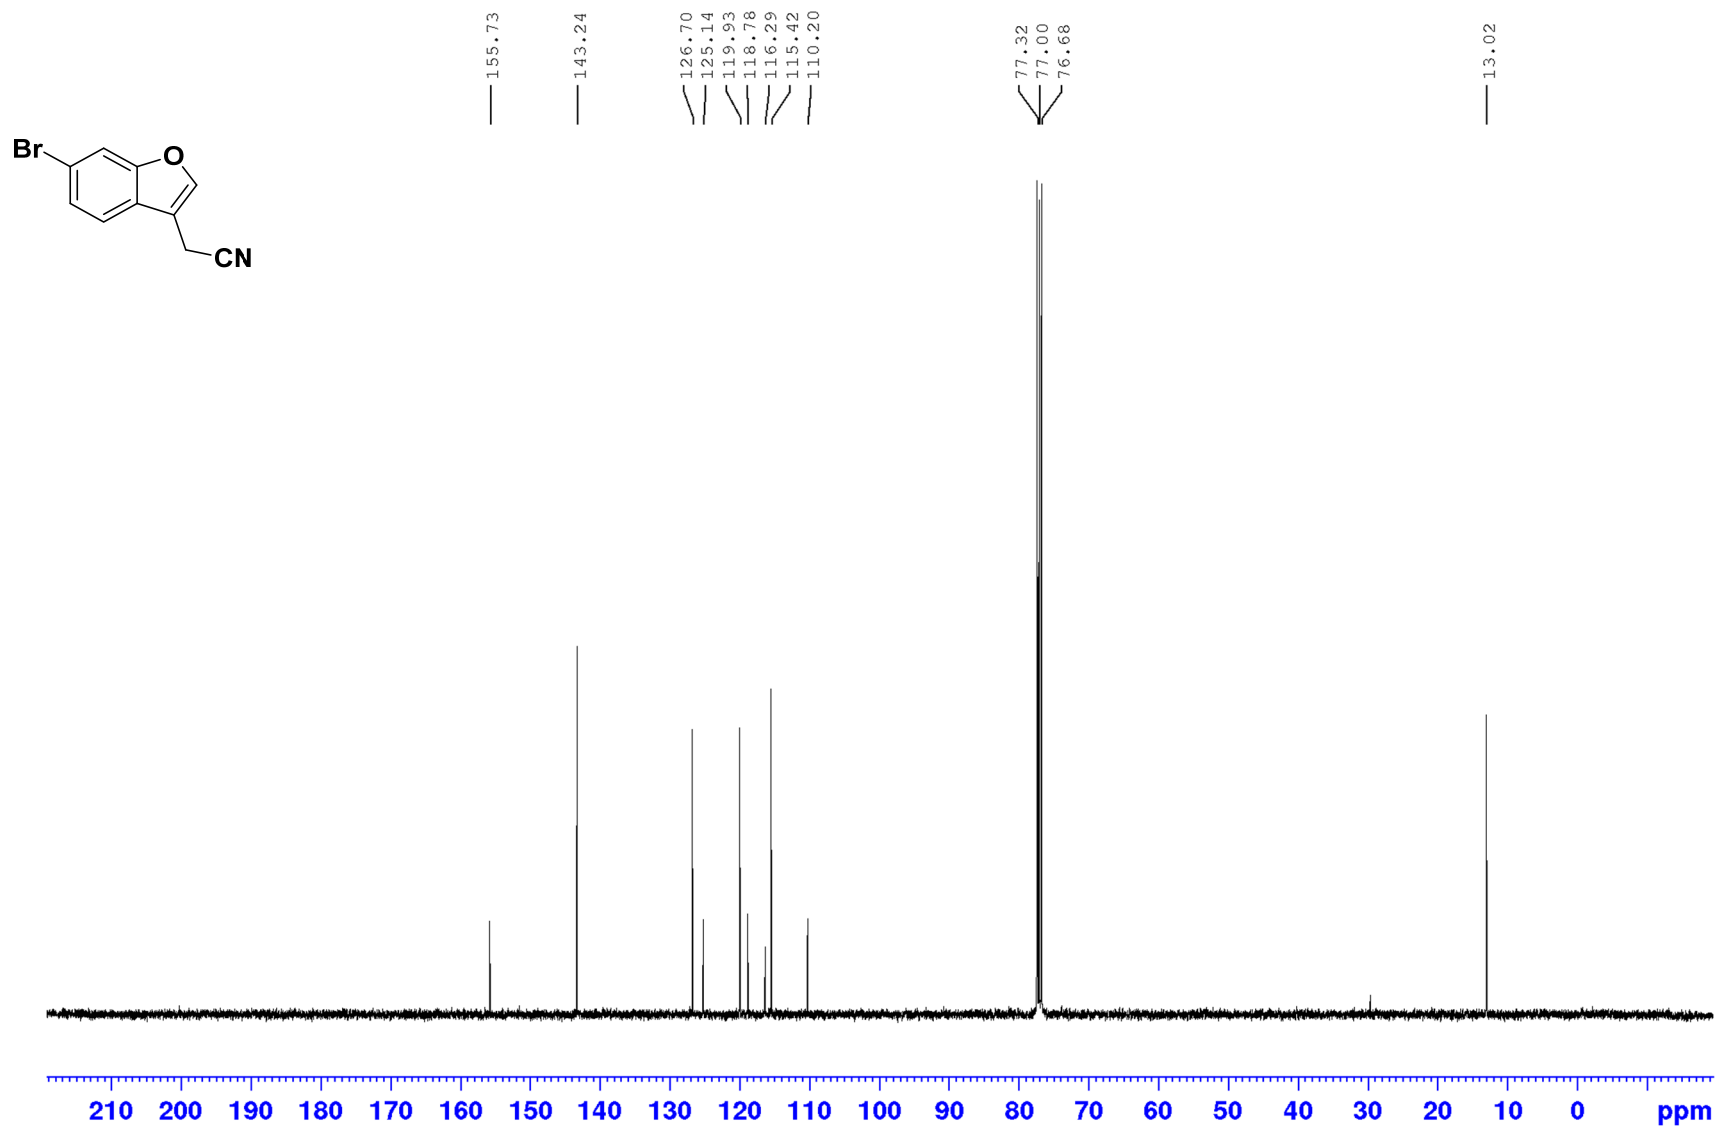

<sup>1</sup>H-NMR (400 MHz, DMSO-*d*<sub>6</sub>) of 5-((6-Bromobenzofuran-3-yl)methyl)-1*H*-tetrazole, 31

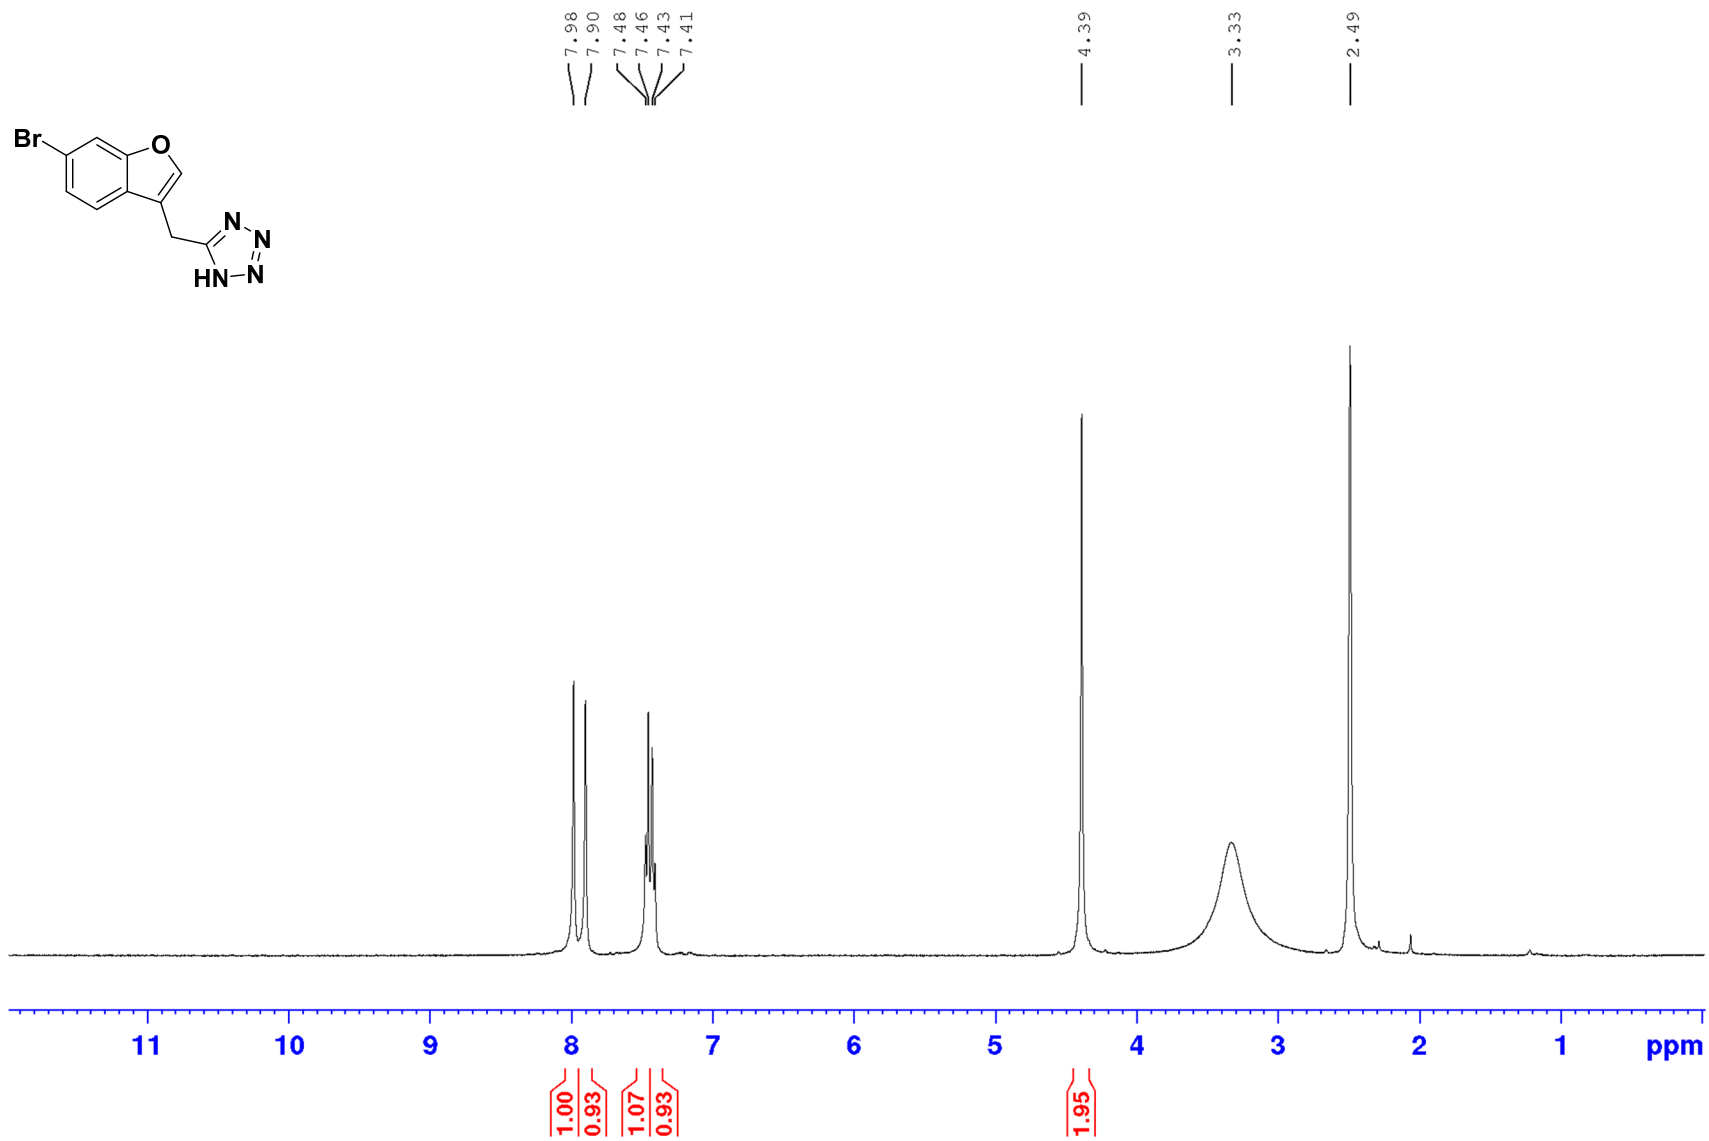

<sup>13</sup>C-NMR (100 MHz, DMSO-*d*<sub>6</sub>) of 5-((6-Bromobenzofuran-3-yl)methyl)-1*H*-tetrazole, 31

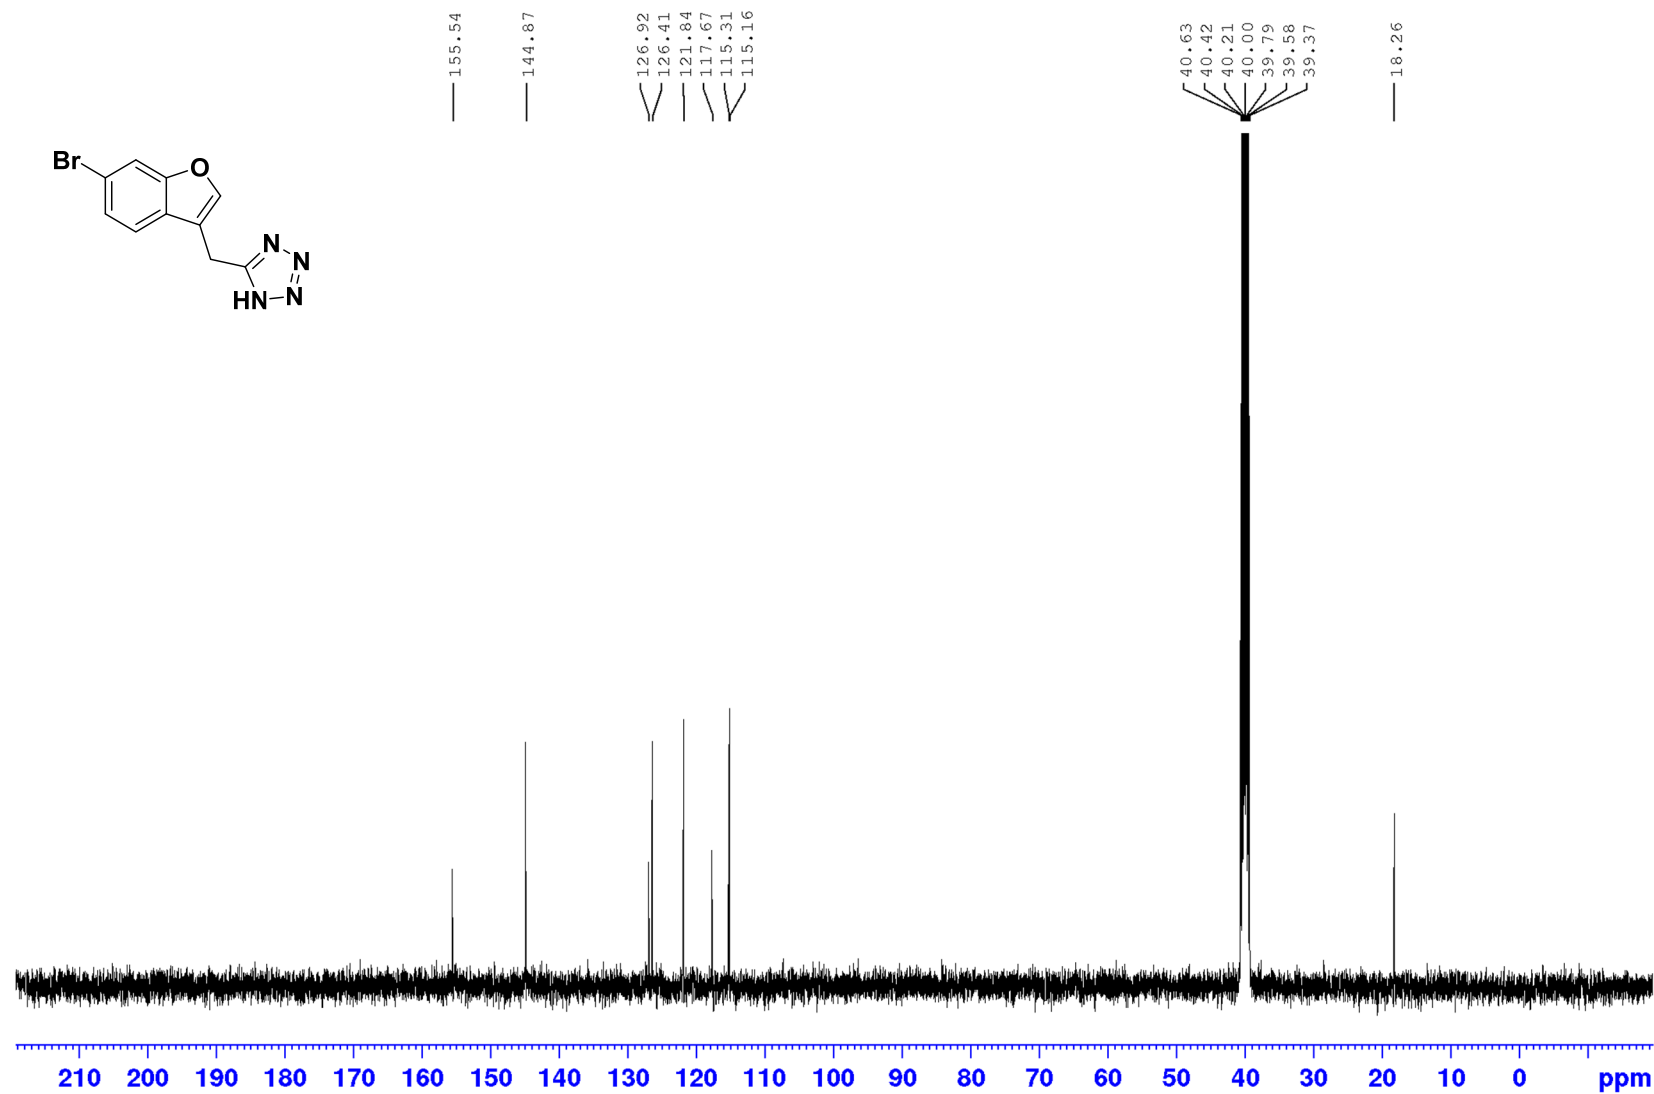

<sup>1</sup>H-NMR (400 MHz, CDCl<sub>3</sub>) of Dimethyl 2-(1-(methoxycarbonyl)-6-phenyl-1H-indol-3-yl)malonate, 35

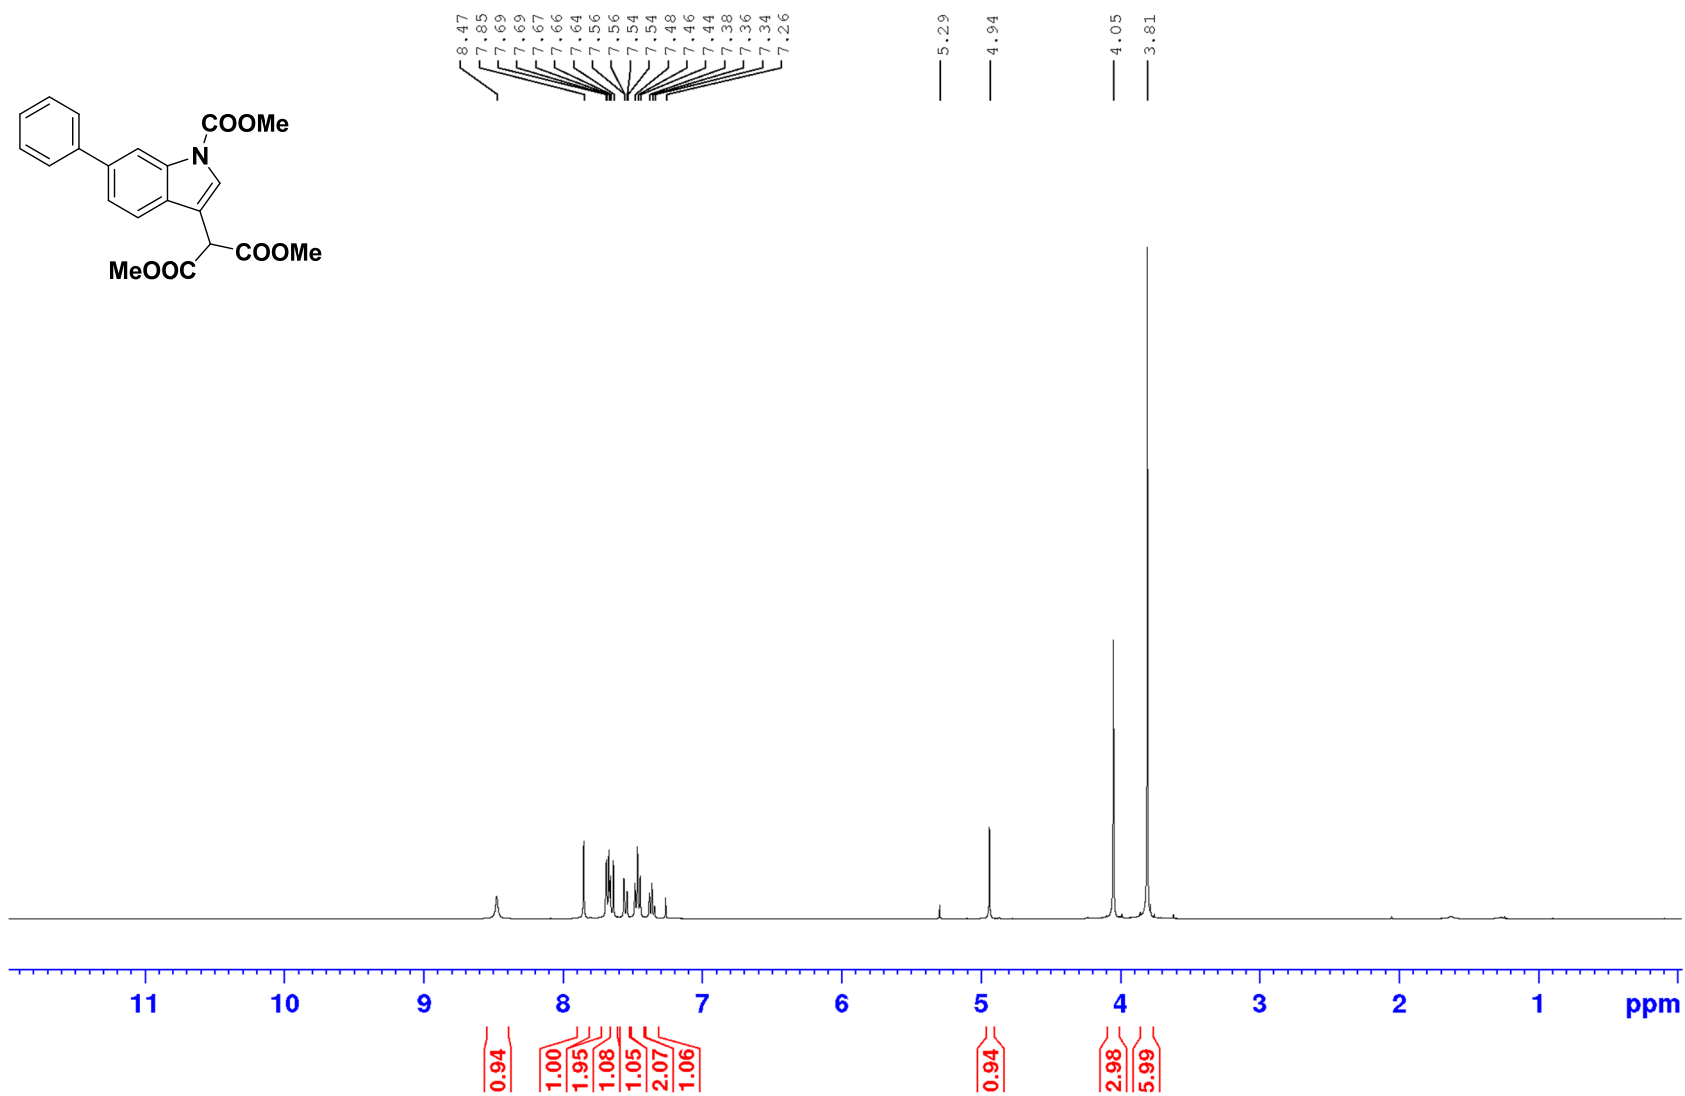

<sup>13</sup>C-NMR (100 MHz, CDCl<sub>3</sub>) of **Dimethyl 2-(1-(methoxycarbonyl)-6-phenyl-1H-indol-3-yl)malonate, 35**

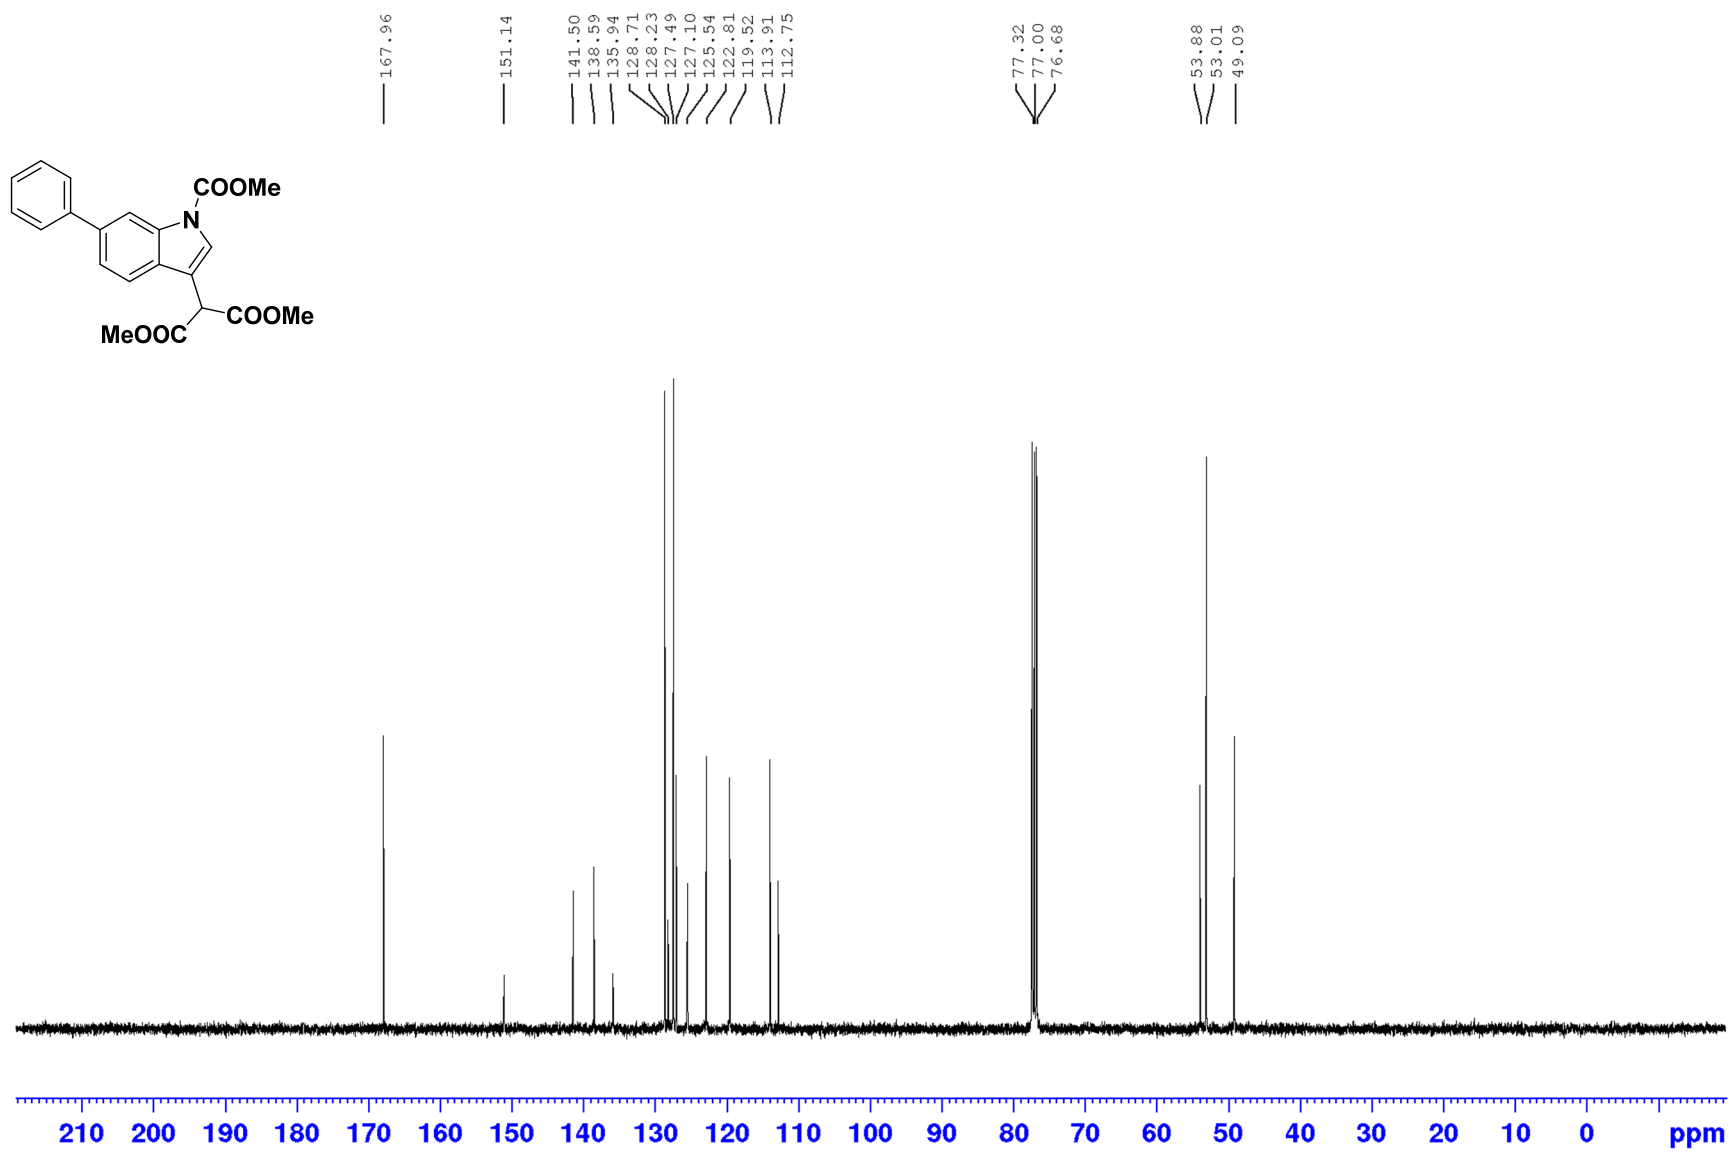

<sup>1</sup>H-NMR (500 MHz, acetone-d<sub>6</sub>) of 2-(6-Phenyl-1H-3-yl)acetic acid, 36

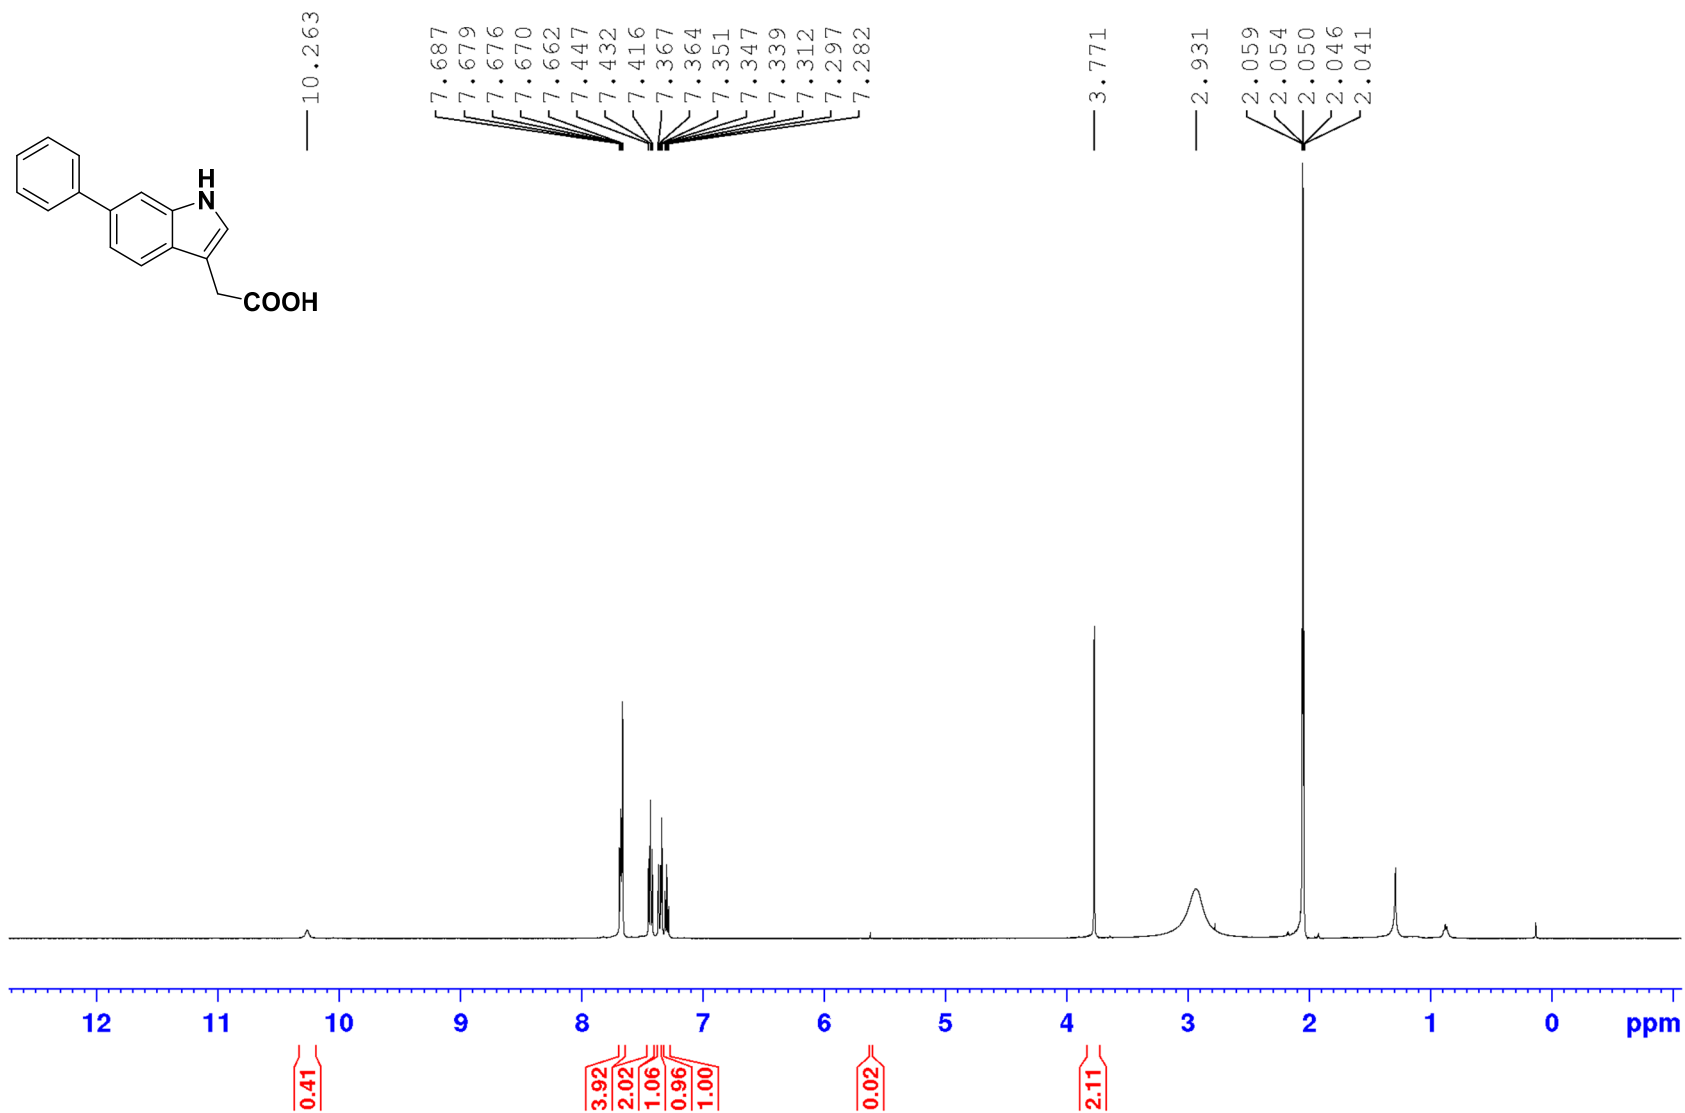



<sup>13</sup>C-NMR (100 MHz, acetone-d<sub>6</sub>) of 2-(6-Phenyl-1H-3-yl)acetic acid, 36

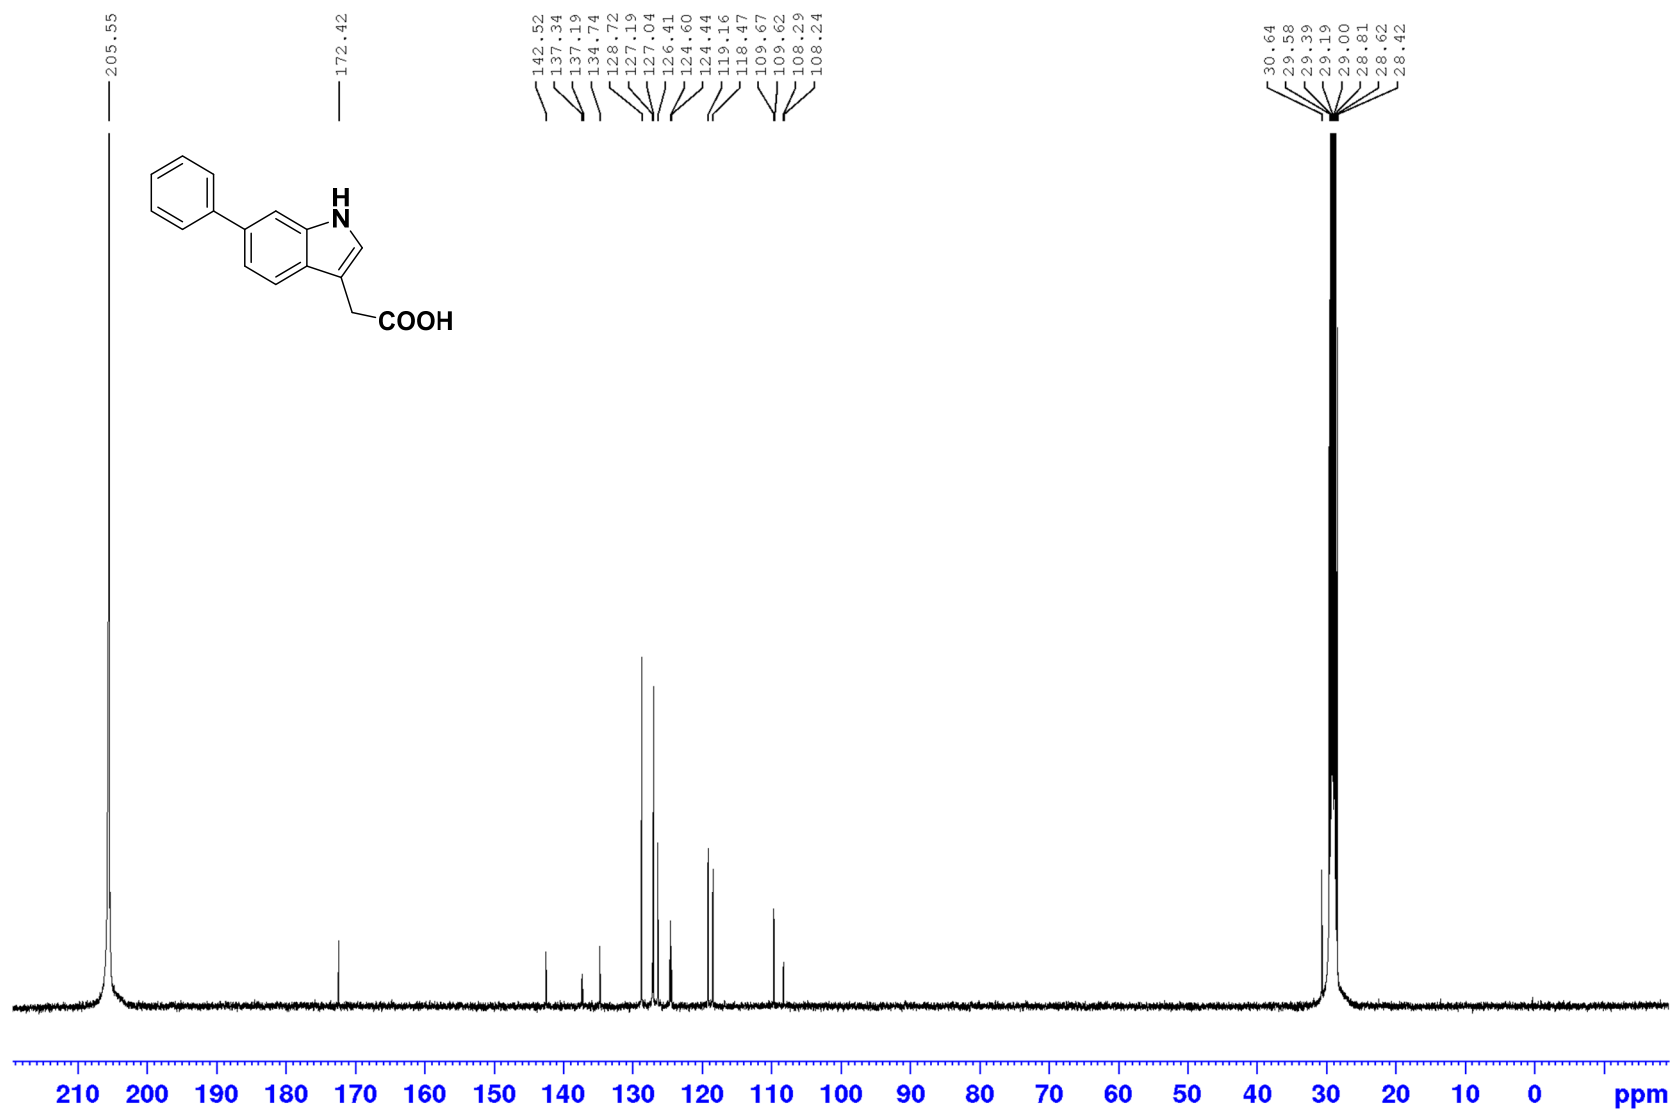

<sup>1</sup>H-NMR (400 MHz, CDCl<sub>3</sub>) of **Methyl 2-bromo-2-(6-bromobenzofuran-3-yl)acetate, 37**

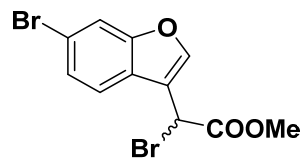

7.86  
7.69  
7.68  
7.67  
7.65  
7.46  
7.46  
7.44  
7.44  
7.26

5.57  
5.57

3.85

1.55

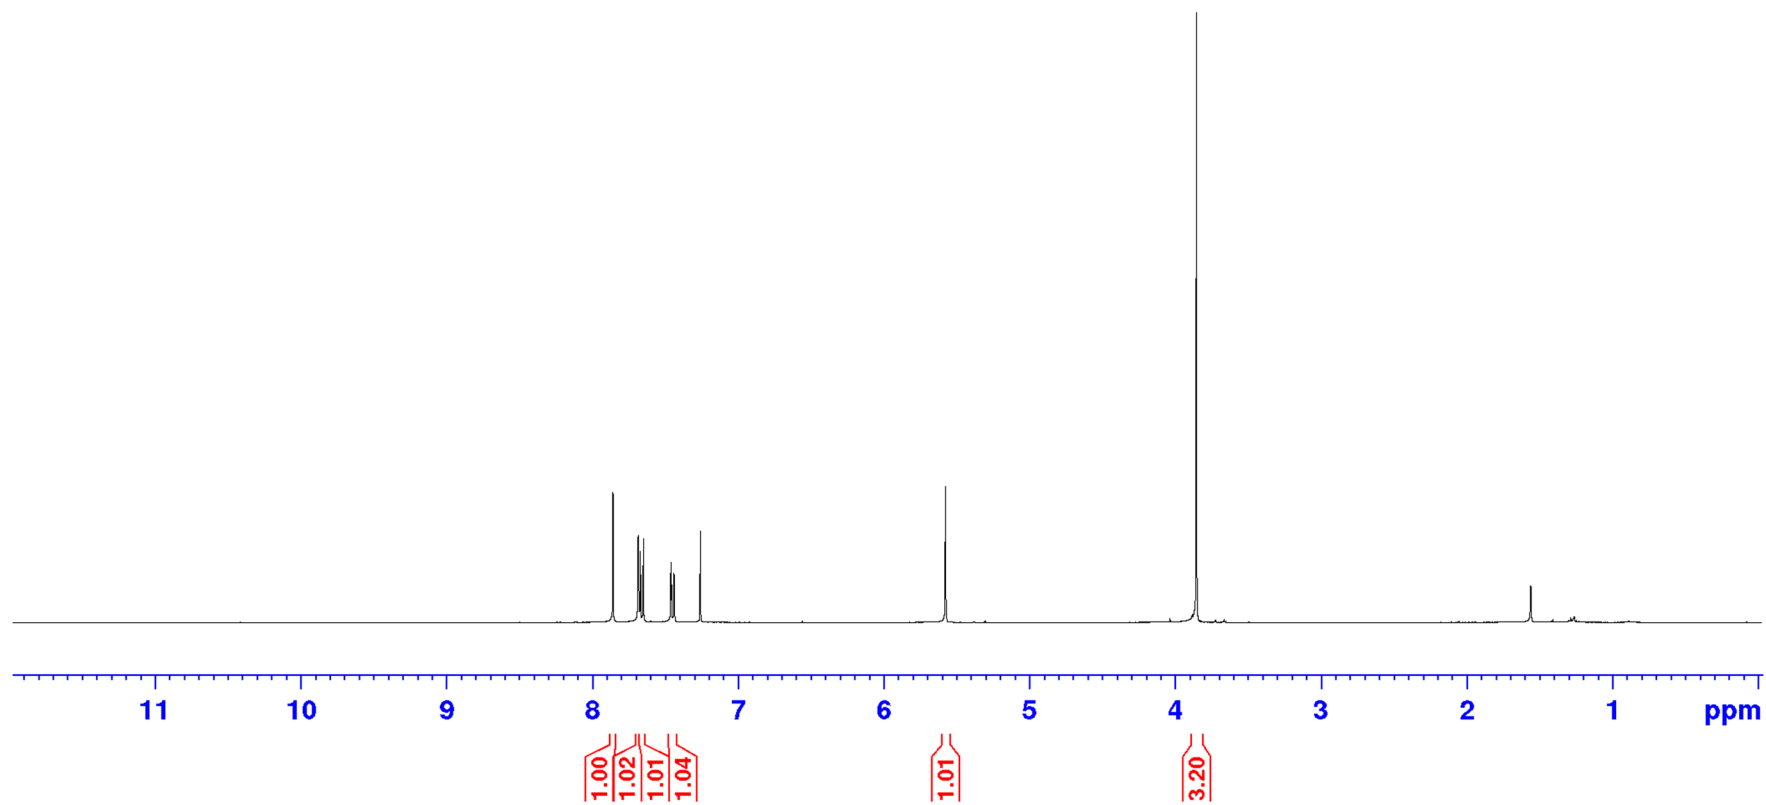

<sup>13</sup>C-NMR (100 MHz, CDCl<sub>3</sub>) of Methyl 2-bromo-2-(6-bromobenzofuran-3-yl)acetate, 37

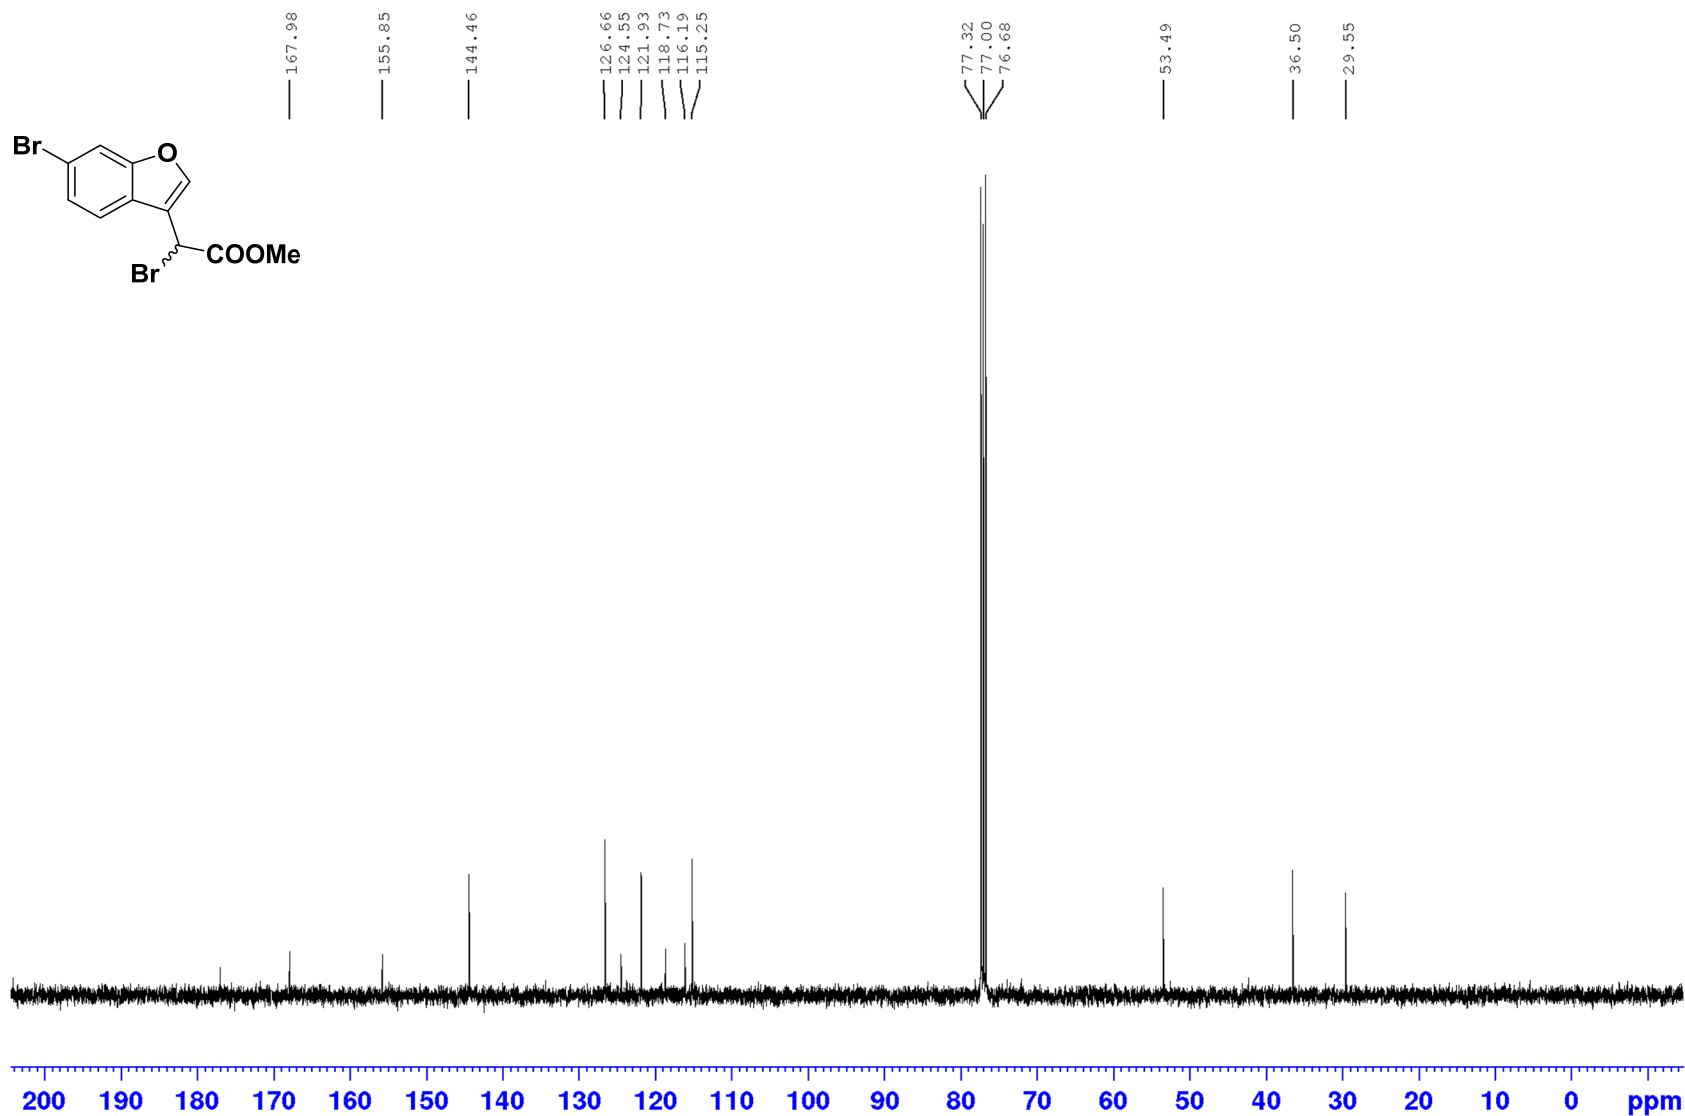

<sup>1</sup>H-NMR (400 MHz, CDCl<sub>3</sub>) of **Methyl-2-azido-2-(6-bromobenzofuran-3-yl)acetate, 38**

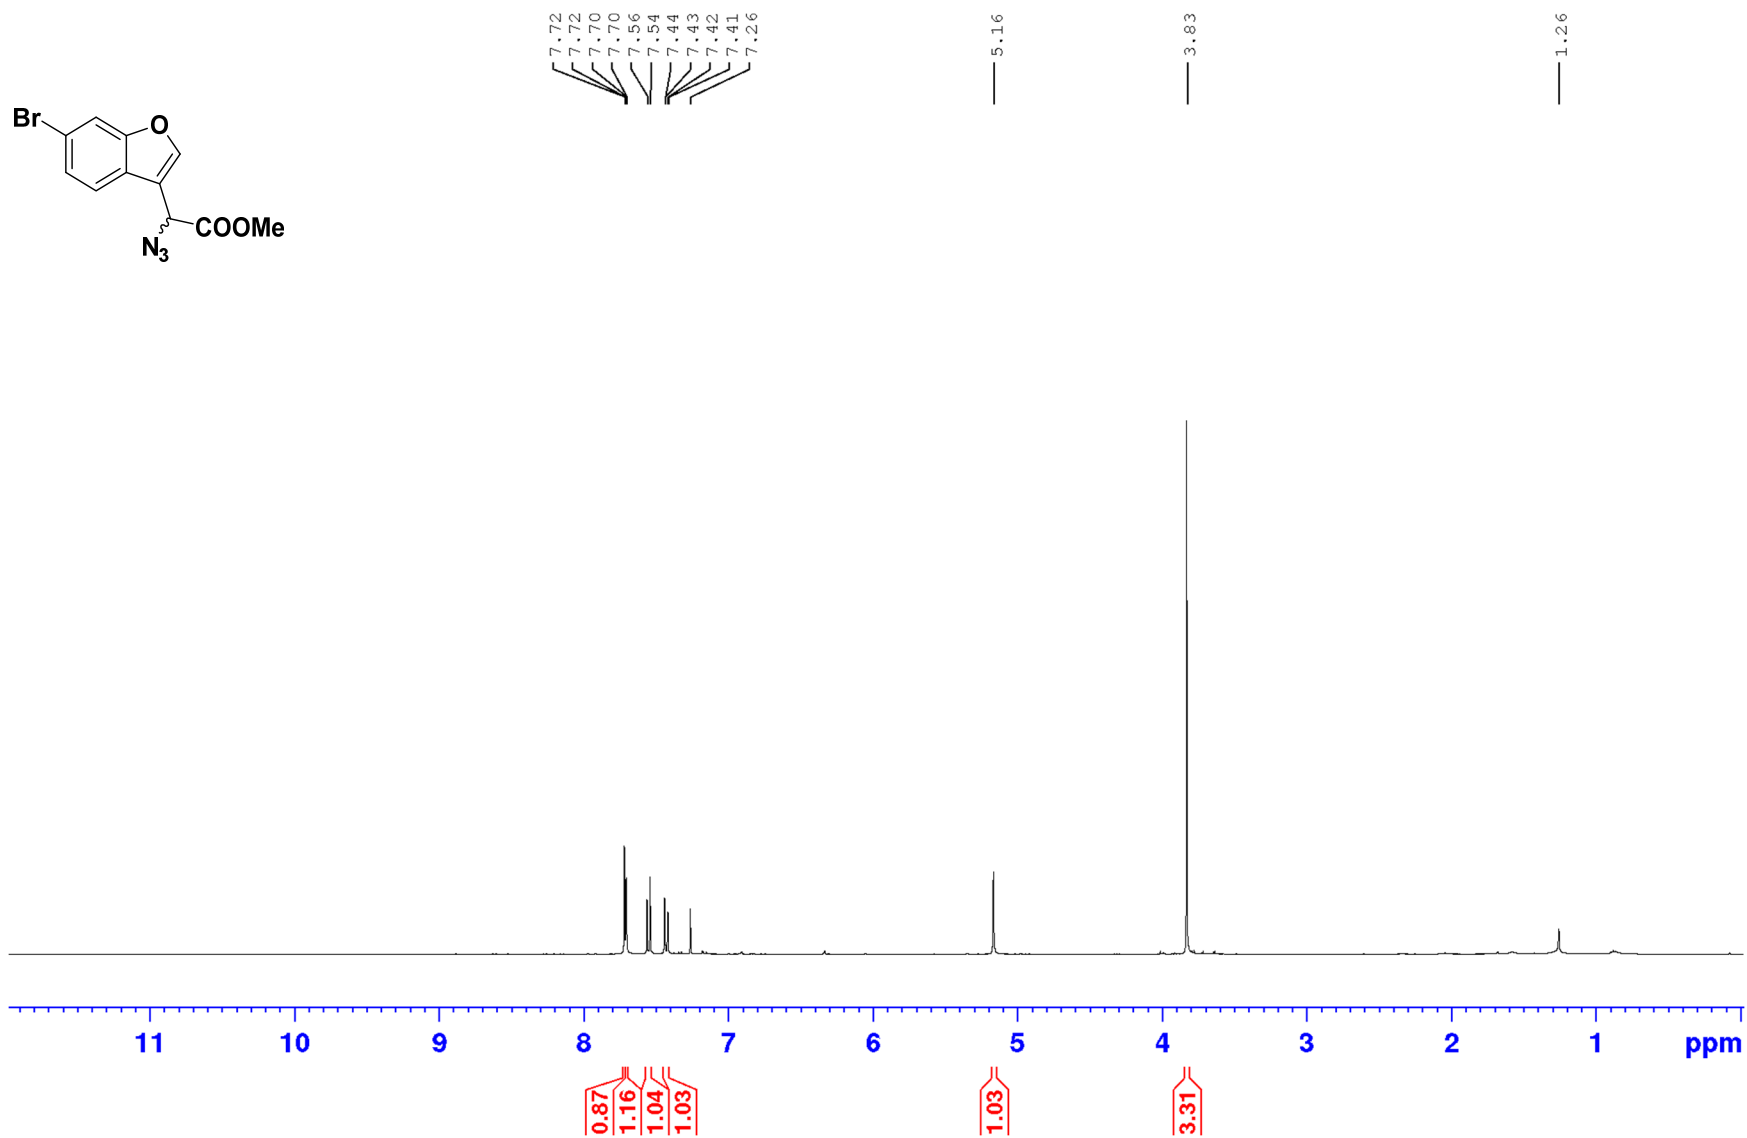

<sup>13</sup>C-NMR (100 MHz, CDCl<sub>3</sub>) of Methyl-2-azido-2-(6-bromobenzofuran-3-yl)acetate, 38

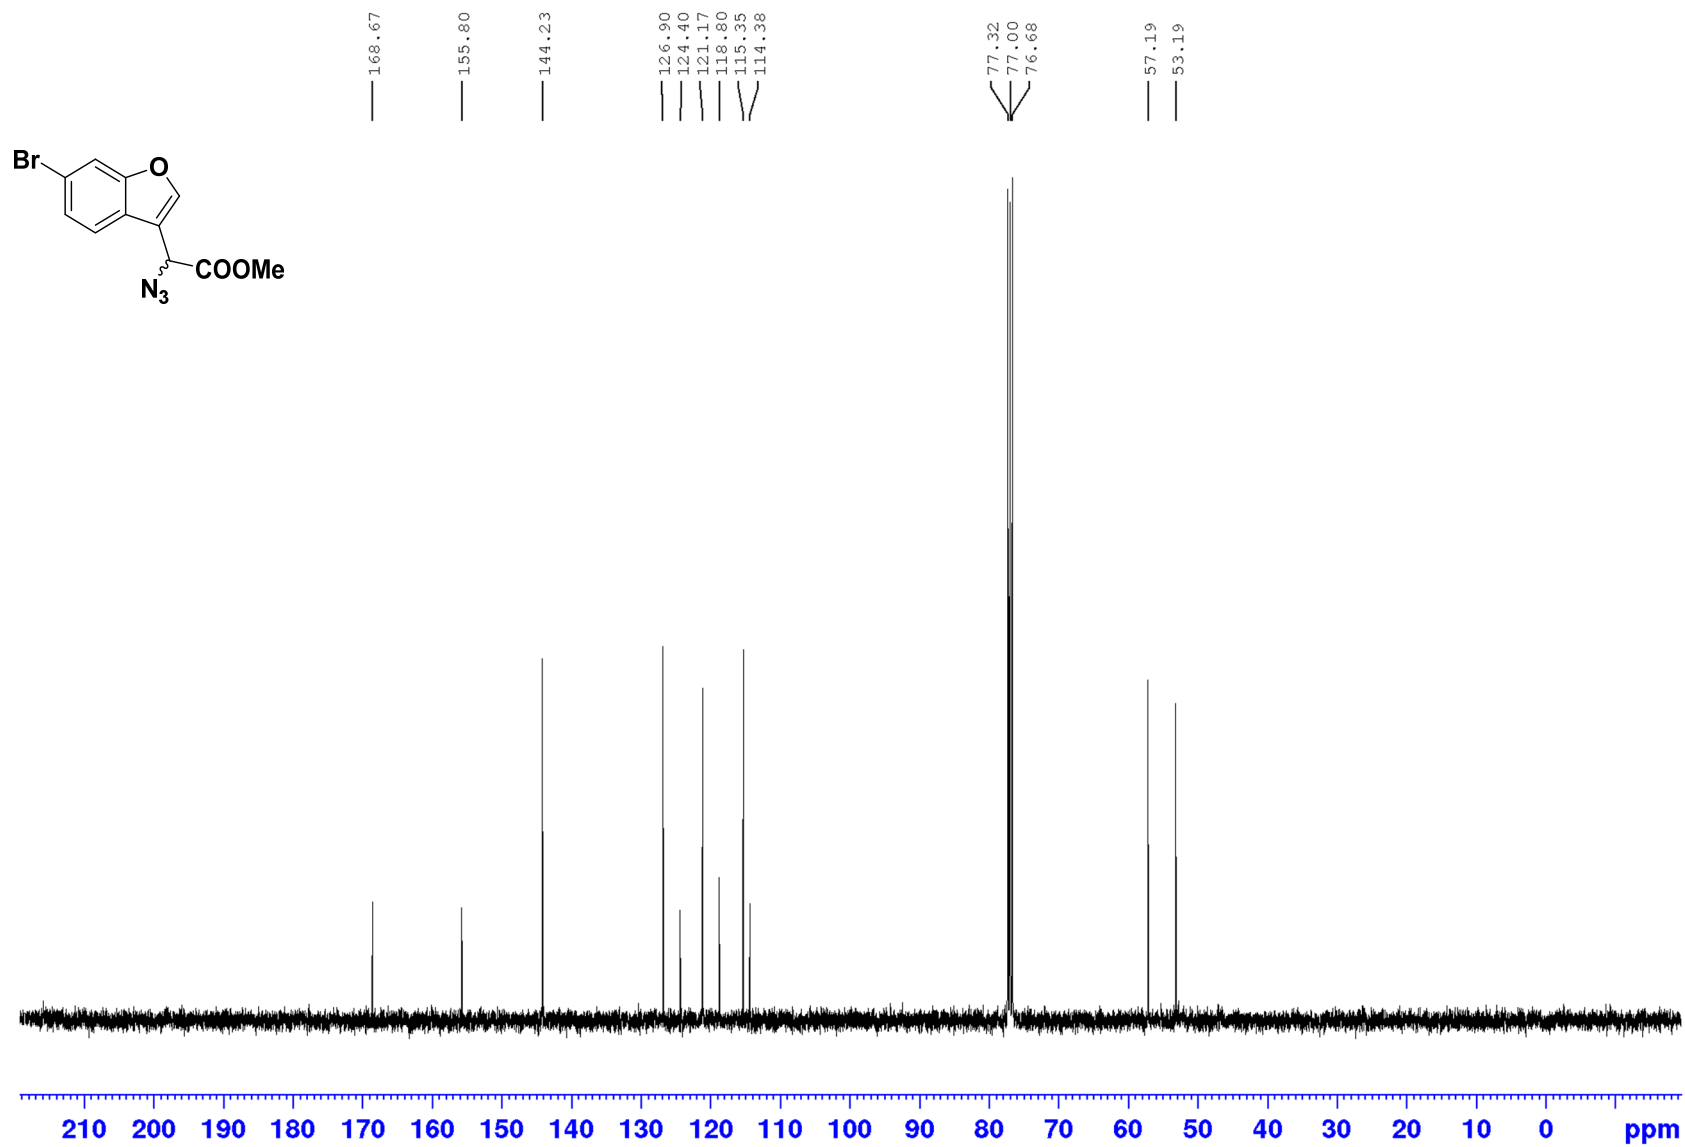

<sup>1</sup>H-NMR (500 MHz, CDCl<sub>3</sub>) of **Methyl-2-amino-2-(6-bromobenzofuran-3-yl)acetate, 39**

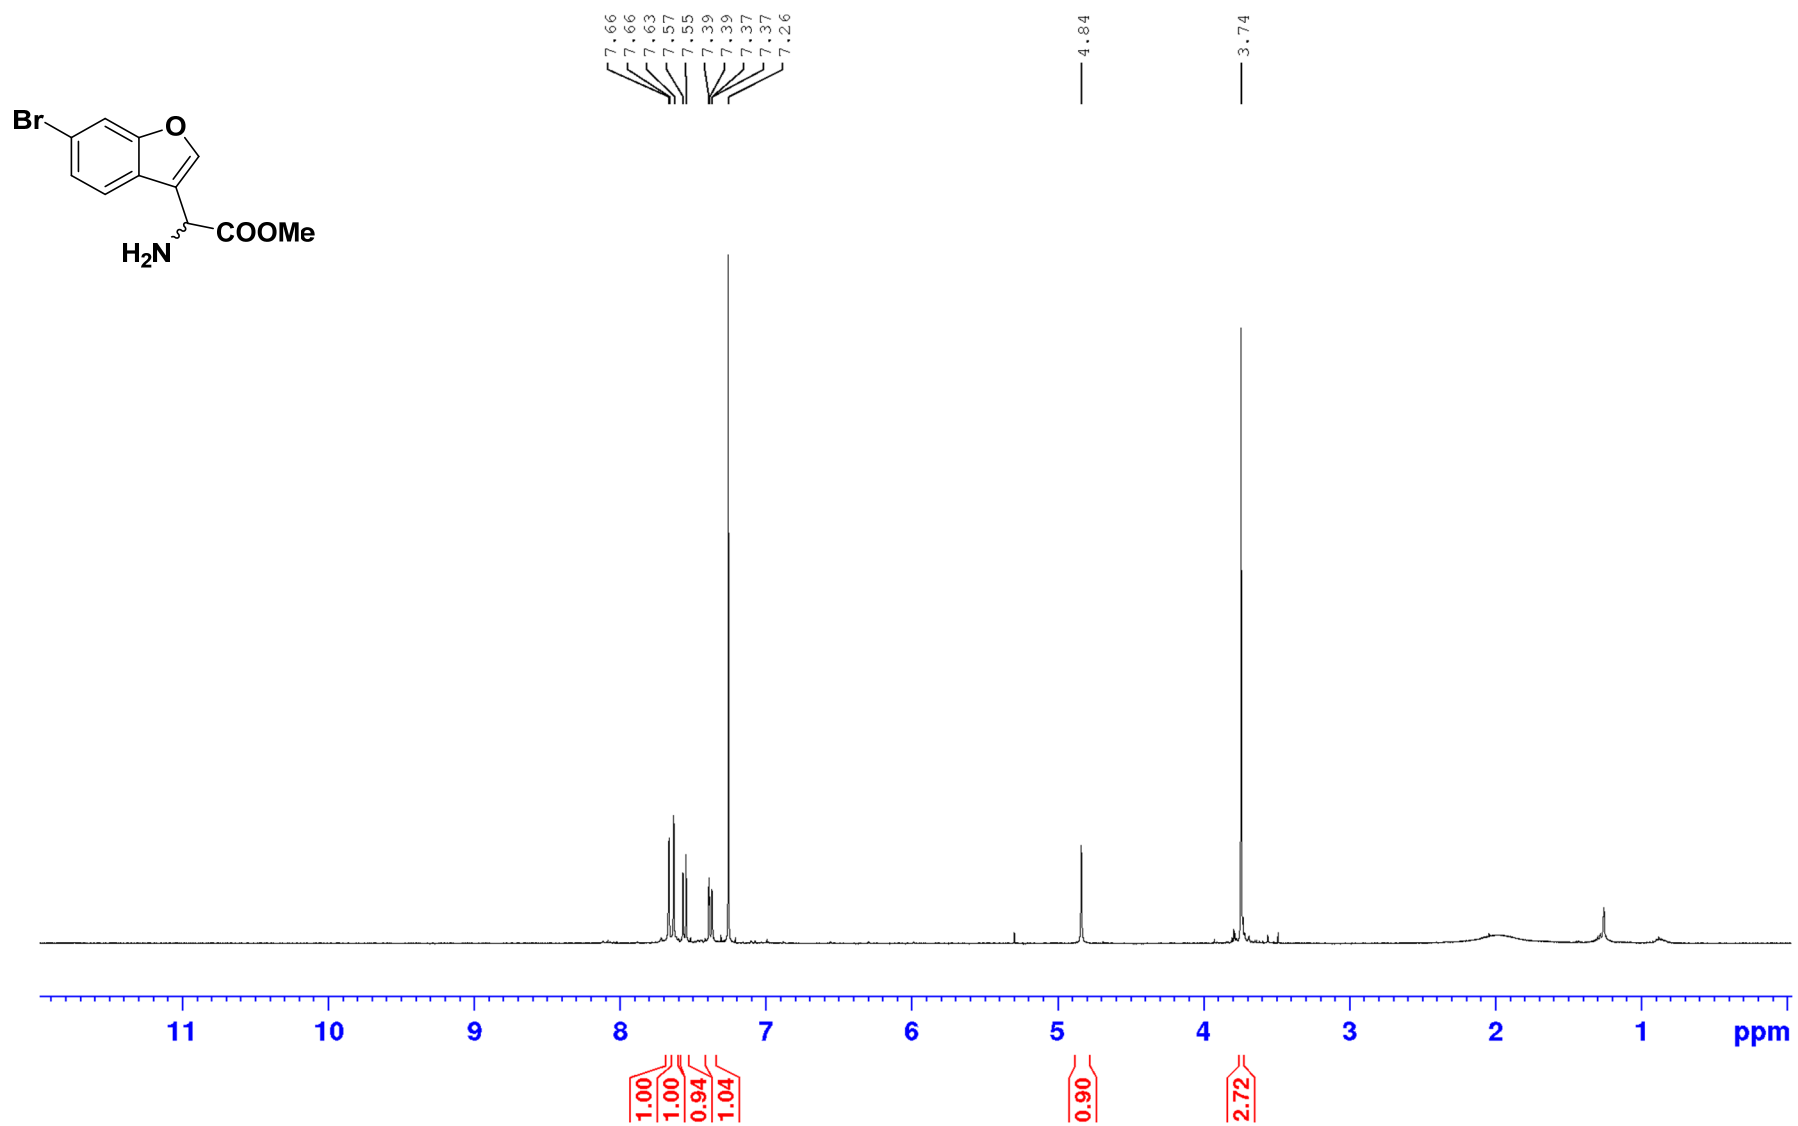

<sup>13</sup>C-NMR (100 MHz, CDCl<sub>3</sub>) of Methyl-2-amino-2-(6-bromobenzofuran-3-yl)acetate, 39

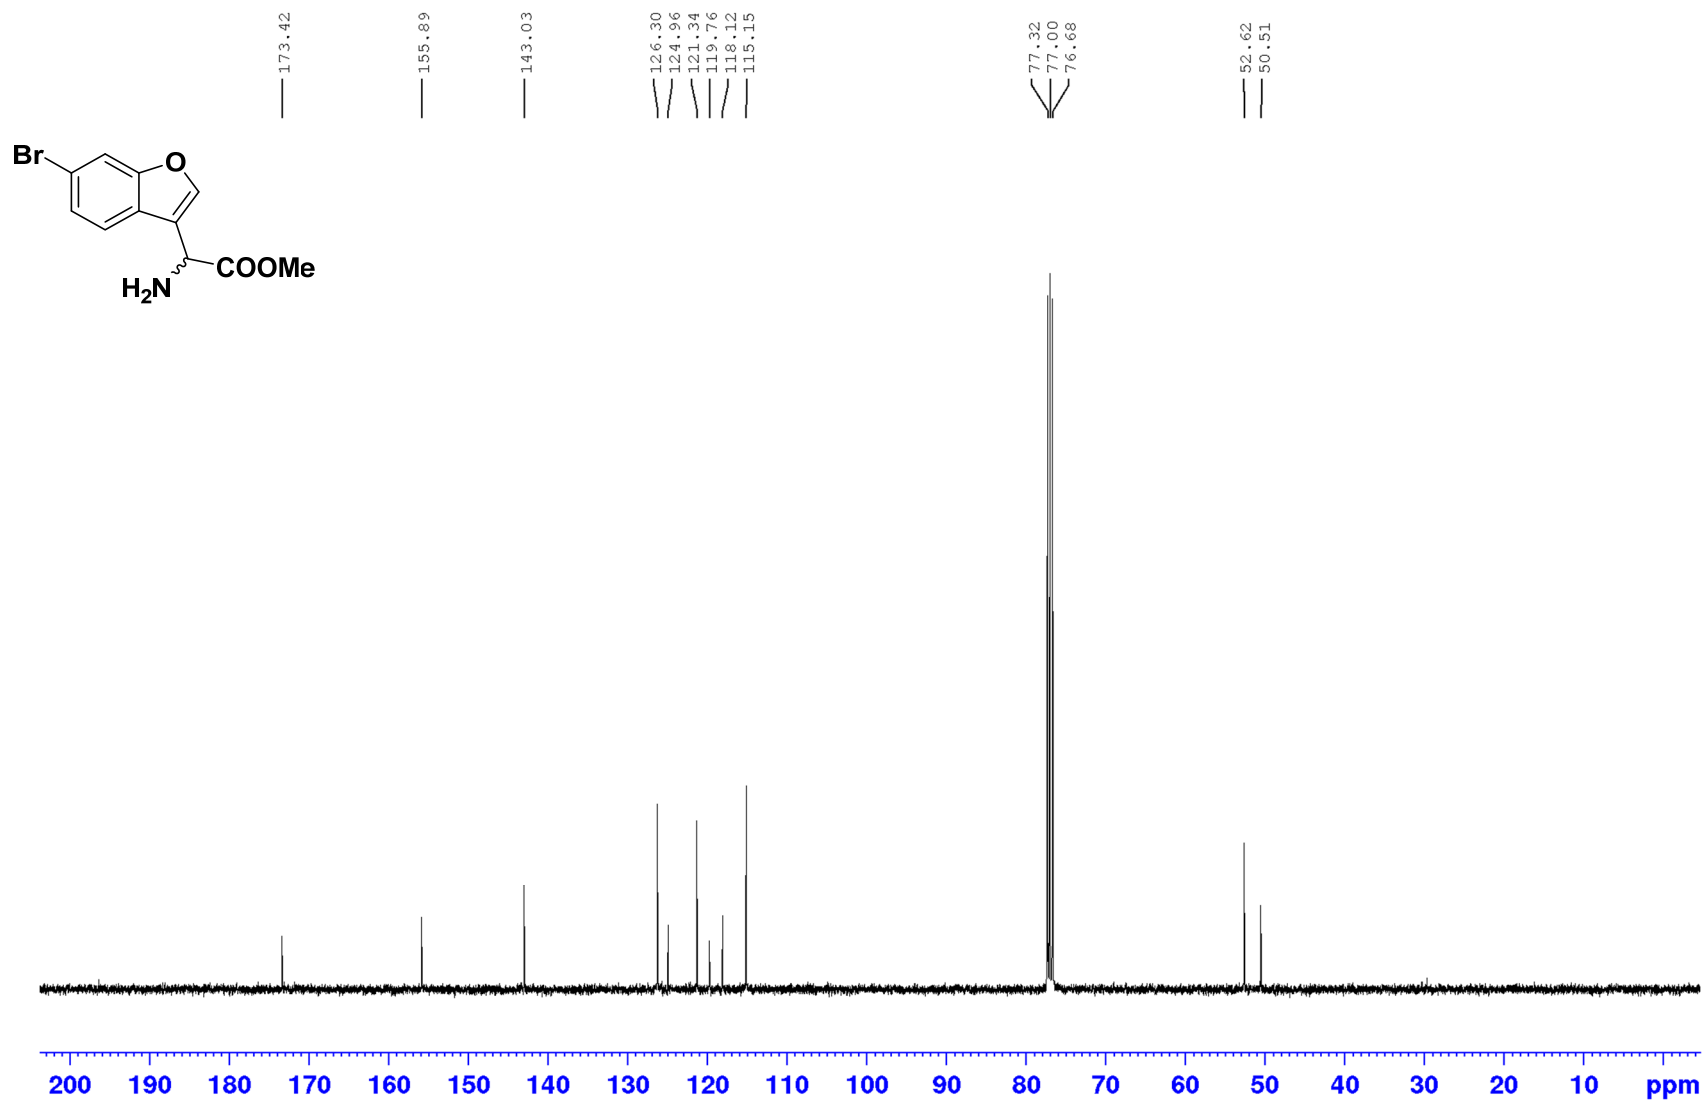

<sup>1</sup>H-NMR (500 MHz, acetone-*d*<sub>6</sub>) of 2-Acetamido-2-(6-bromobenzofuran-3-yl)acetic acid, 46

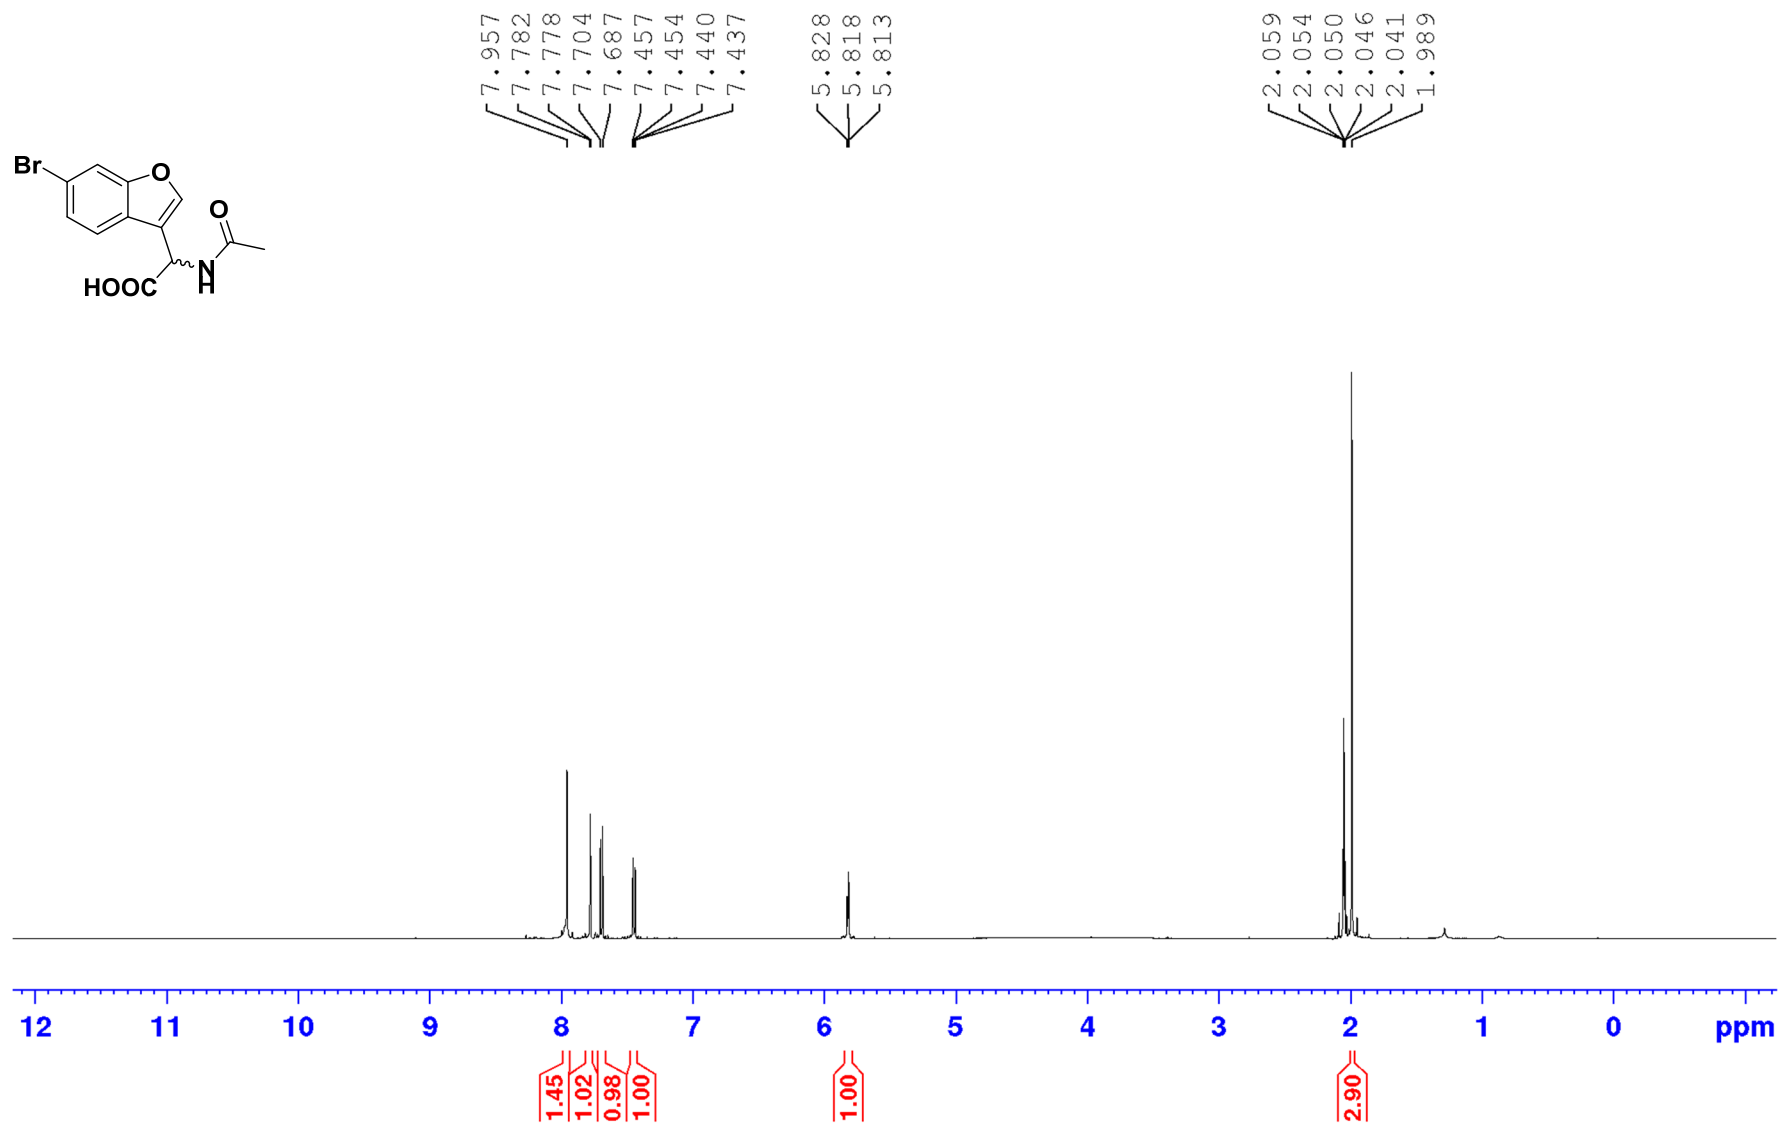



<sup>13</sup>C-NMR (100 MHz, acetone-d<sub>6</sub>) of 2-Acetamido-2-(6-bromobenzofuran-3-yl)acetic acid, 46

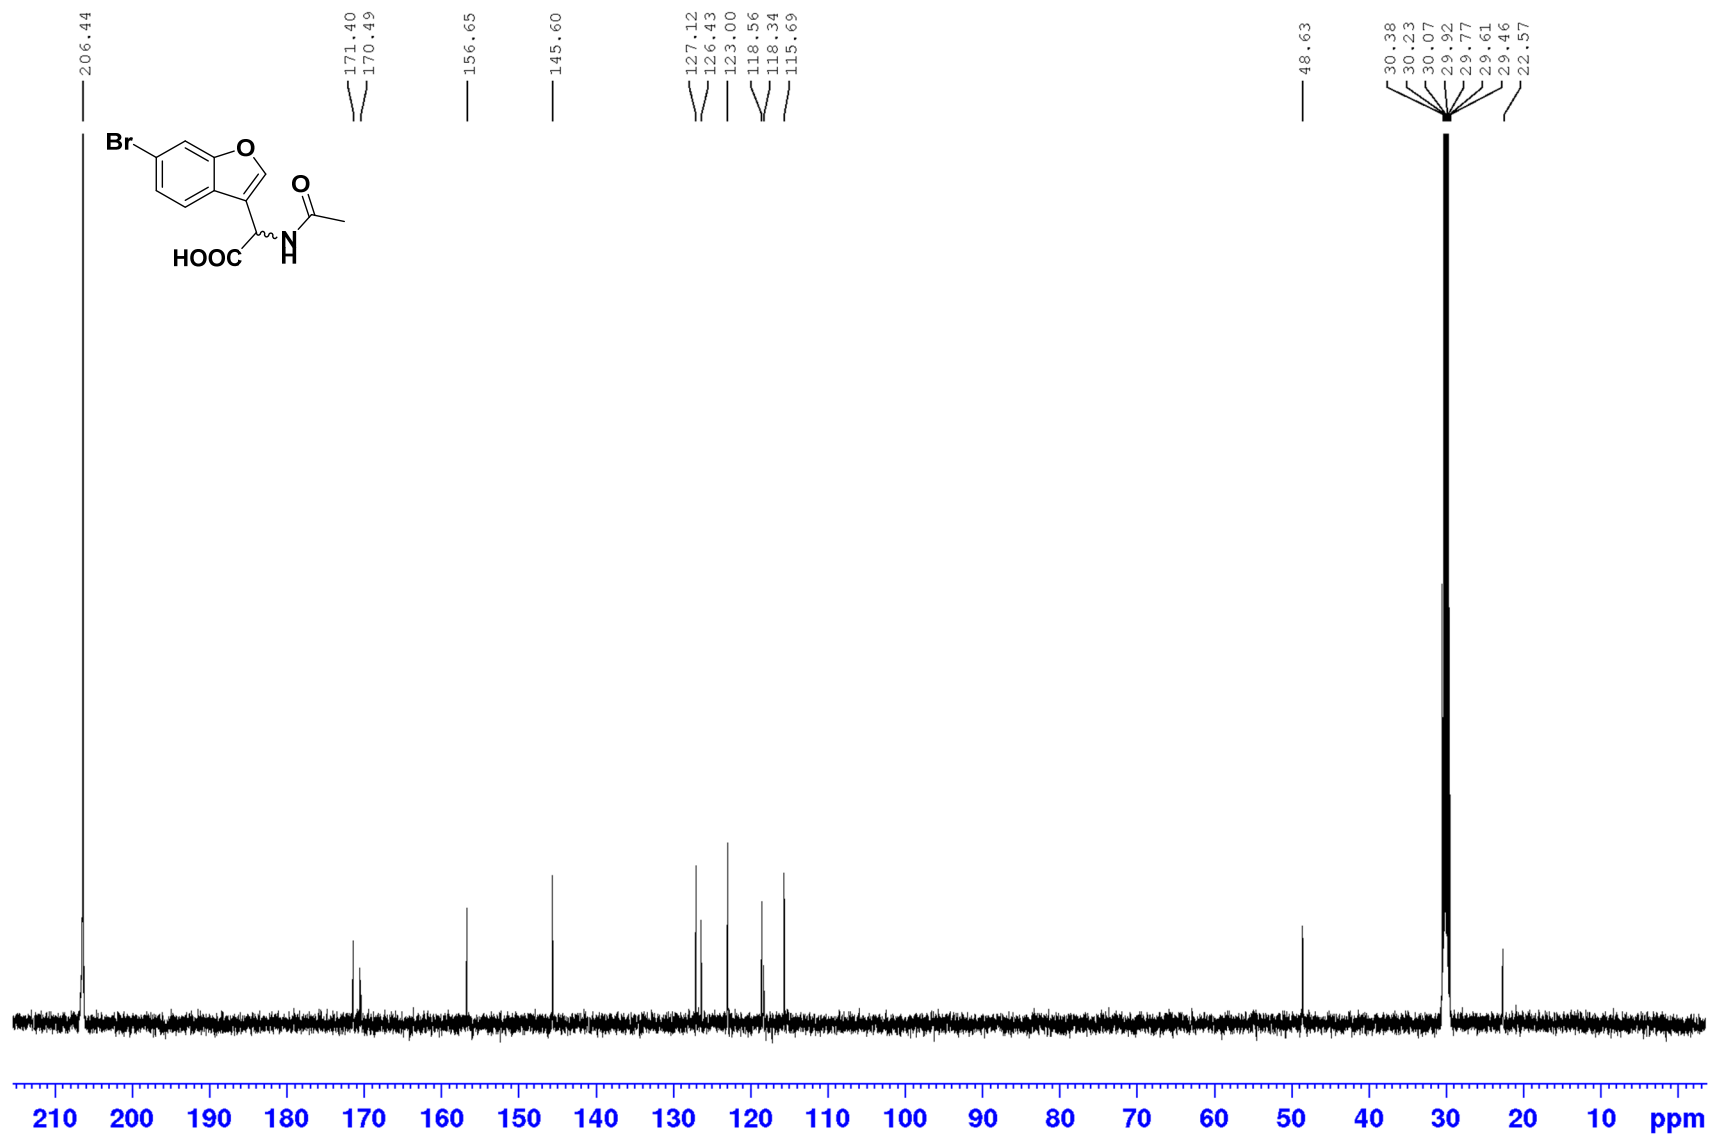

<sup>1</sup>H-NMR (500 MHz, CDCl<sub>3</sub>) of **2-Benzamido-2-(6-bromobenzofuran-3-yl)-2-acetic acid, 47**

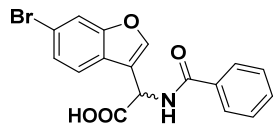

9.189  
9.175  
8.125  
7.927  
7.924  
7.911  
7.910  
7.895  
7.893  
7.706  
7.689  
7.552  
7.538  
7.523  
7.498  
7.478  
7.475  
7.458  
7.444  
5.840  
5.826

— 3.371

2.493  
2.490  
2.487

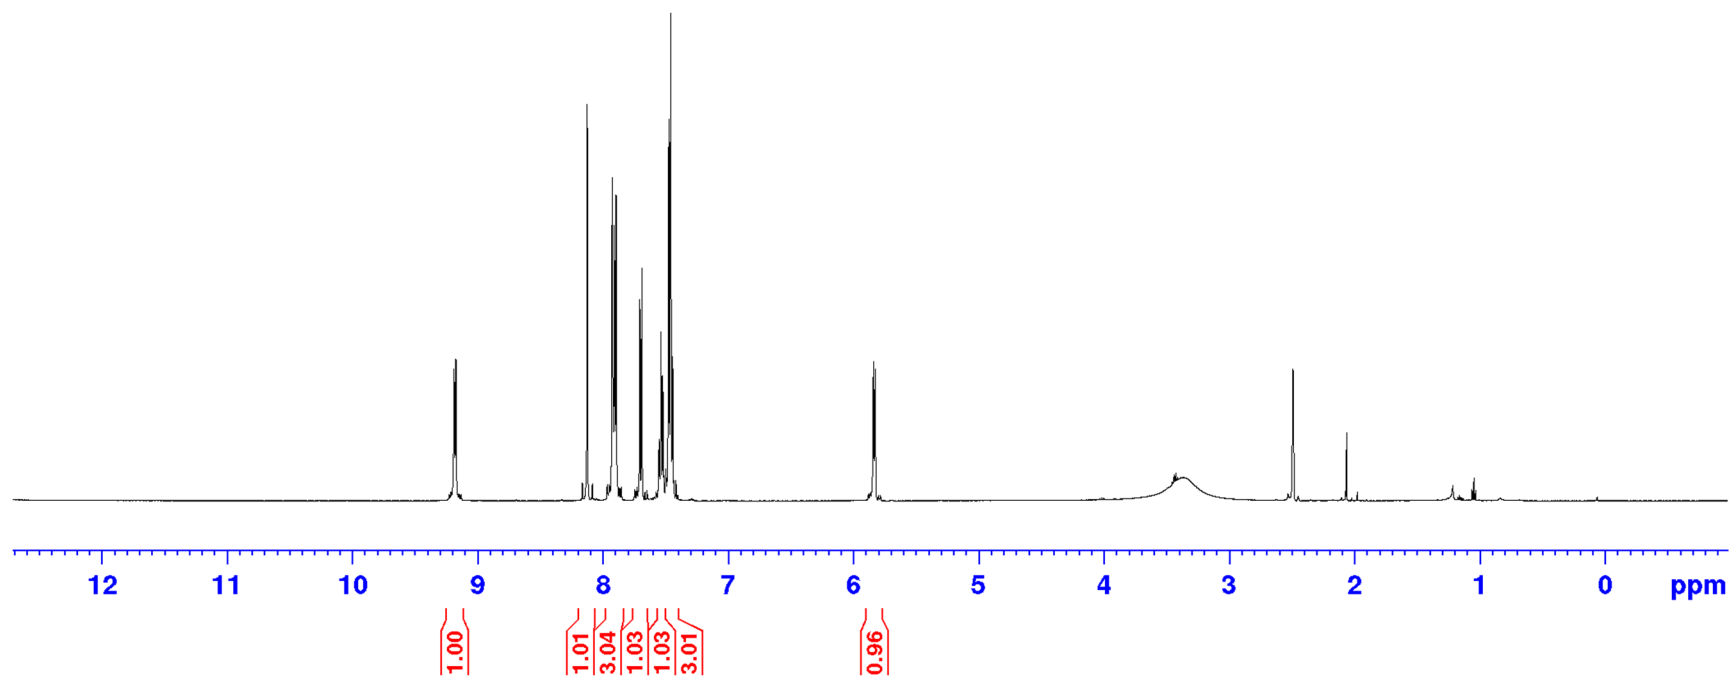

<sup>13</sup>C-NMR (100 MHz, DMSO-d<sub>6</sub>) of 2-Benzamido-2-(6-bromobenzofuran-3-yl)-2-acetic acid, 47

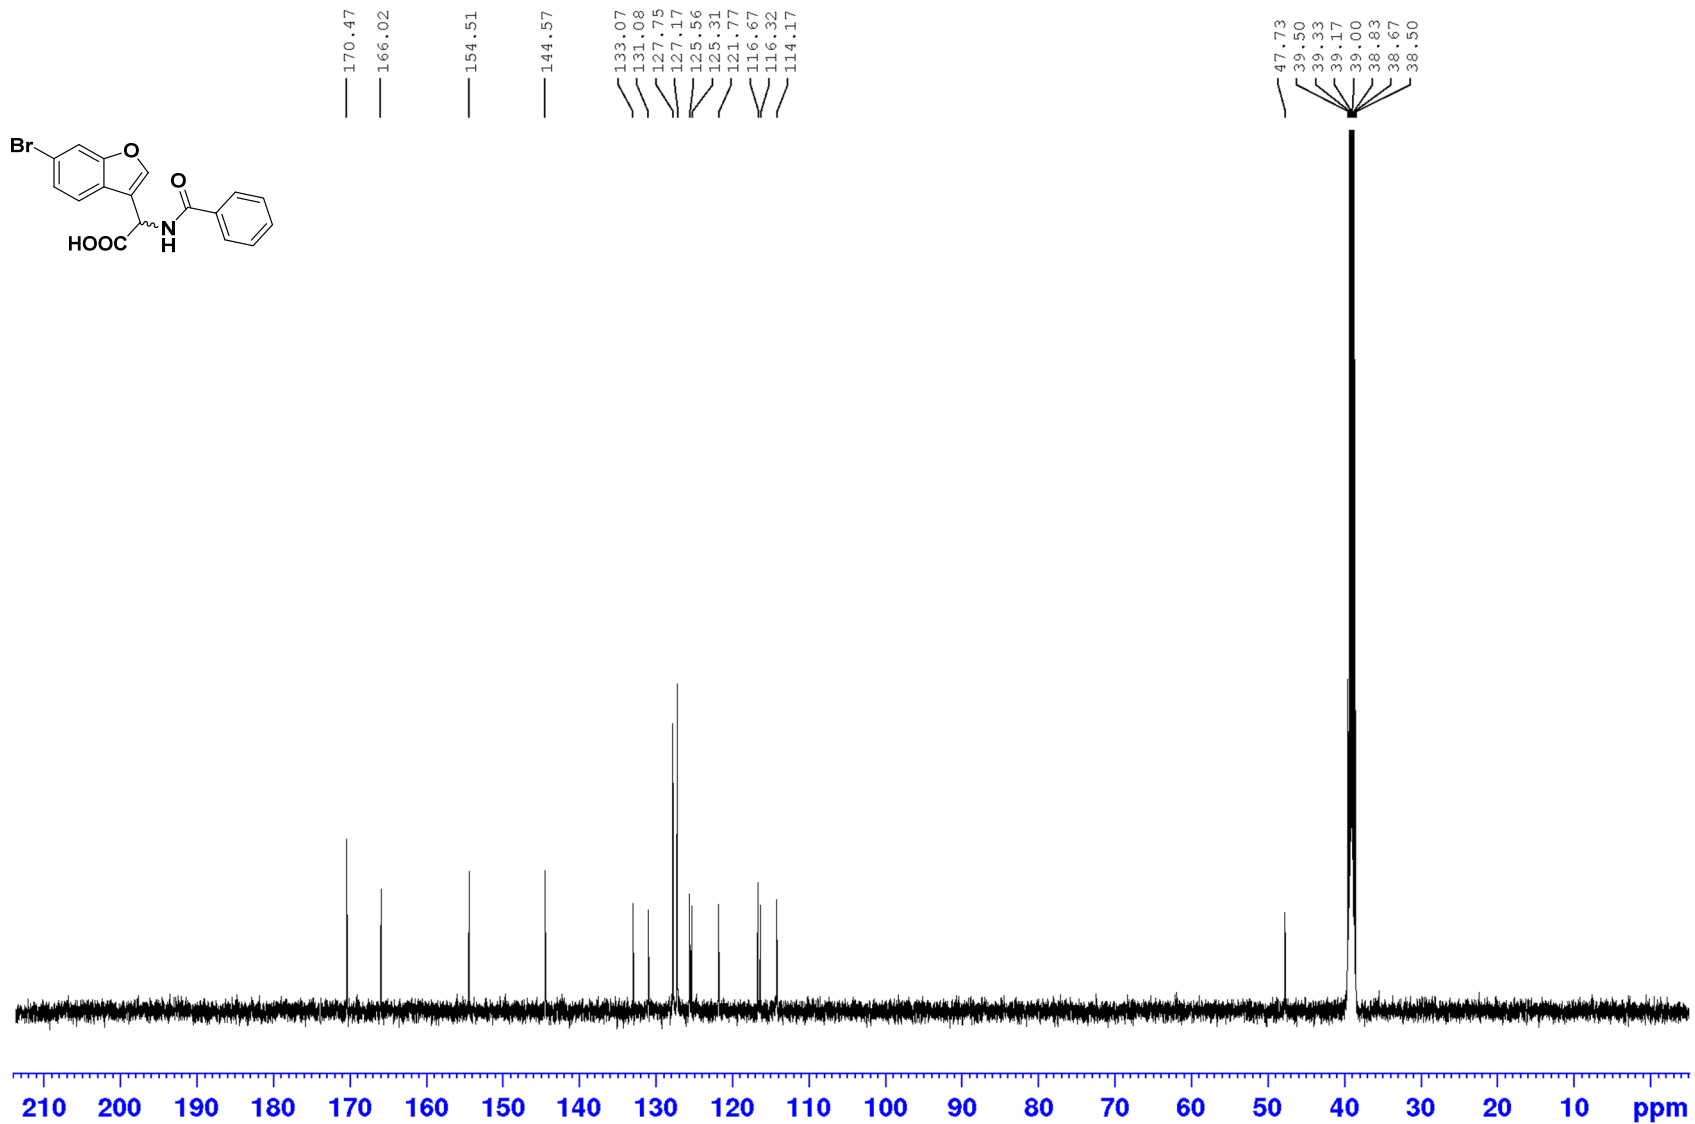

<sup>1</sup>H-NMR (400 MHz, CD<sub>3</sub>OD) of 2-(6-Bromobenzofuran-3-yl)-2-(2-(4-methoxyphenyl)acetamido)acetic acid, 48

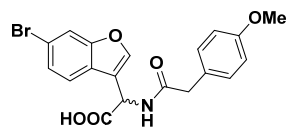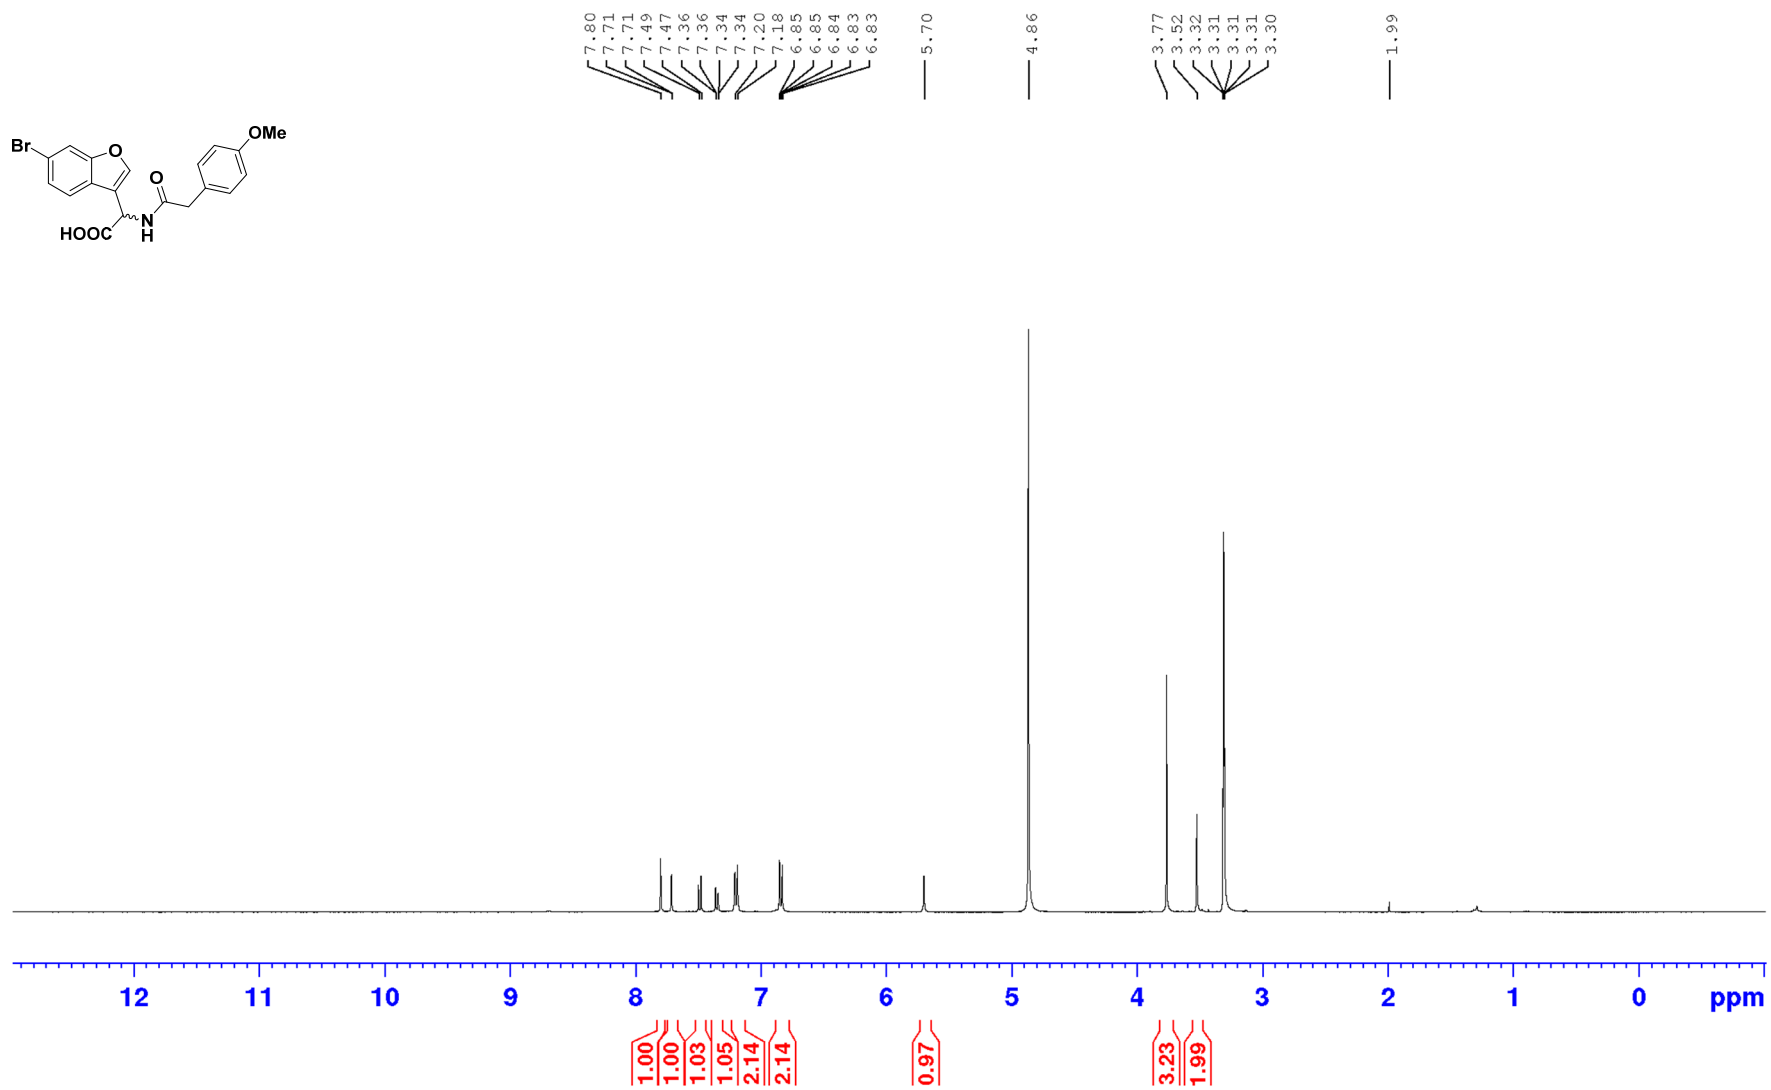

<sup>1</sup>H-NMR (500 MHz, DMSO-*d*<sub>6</sub>) of 2-(6-Bromobenzofuran-3-yl)-2-(2-(2-fluorophenyl)acetamido)acetic acid, 49

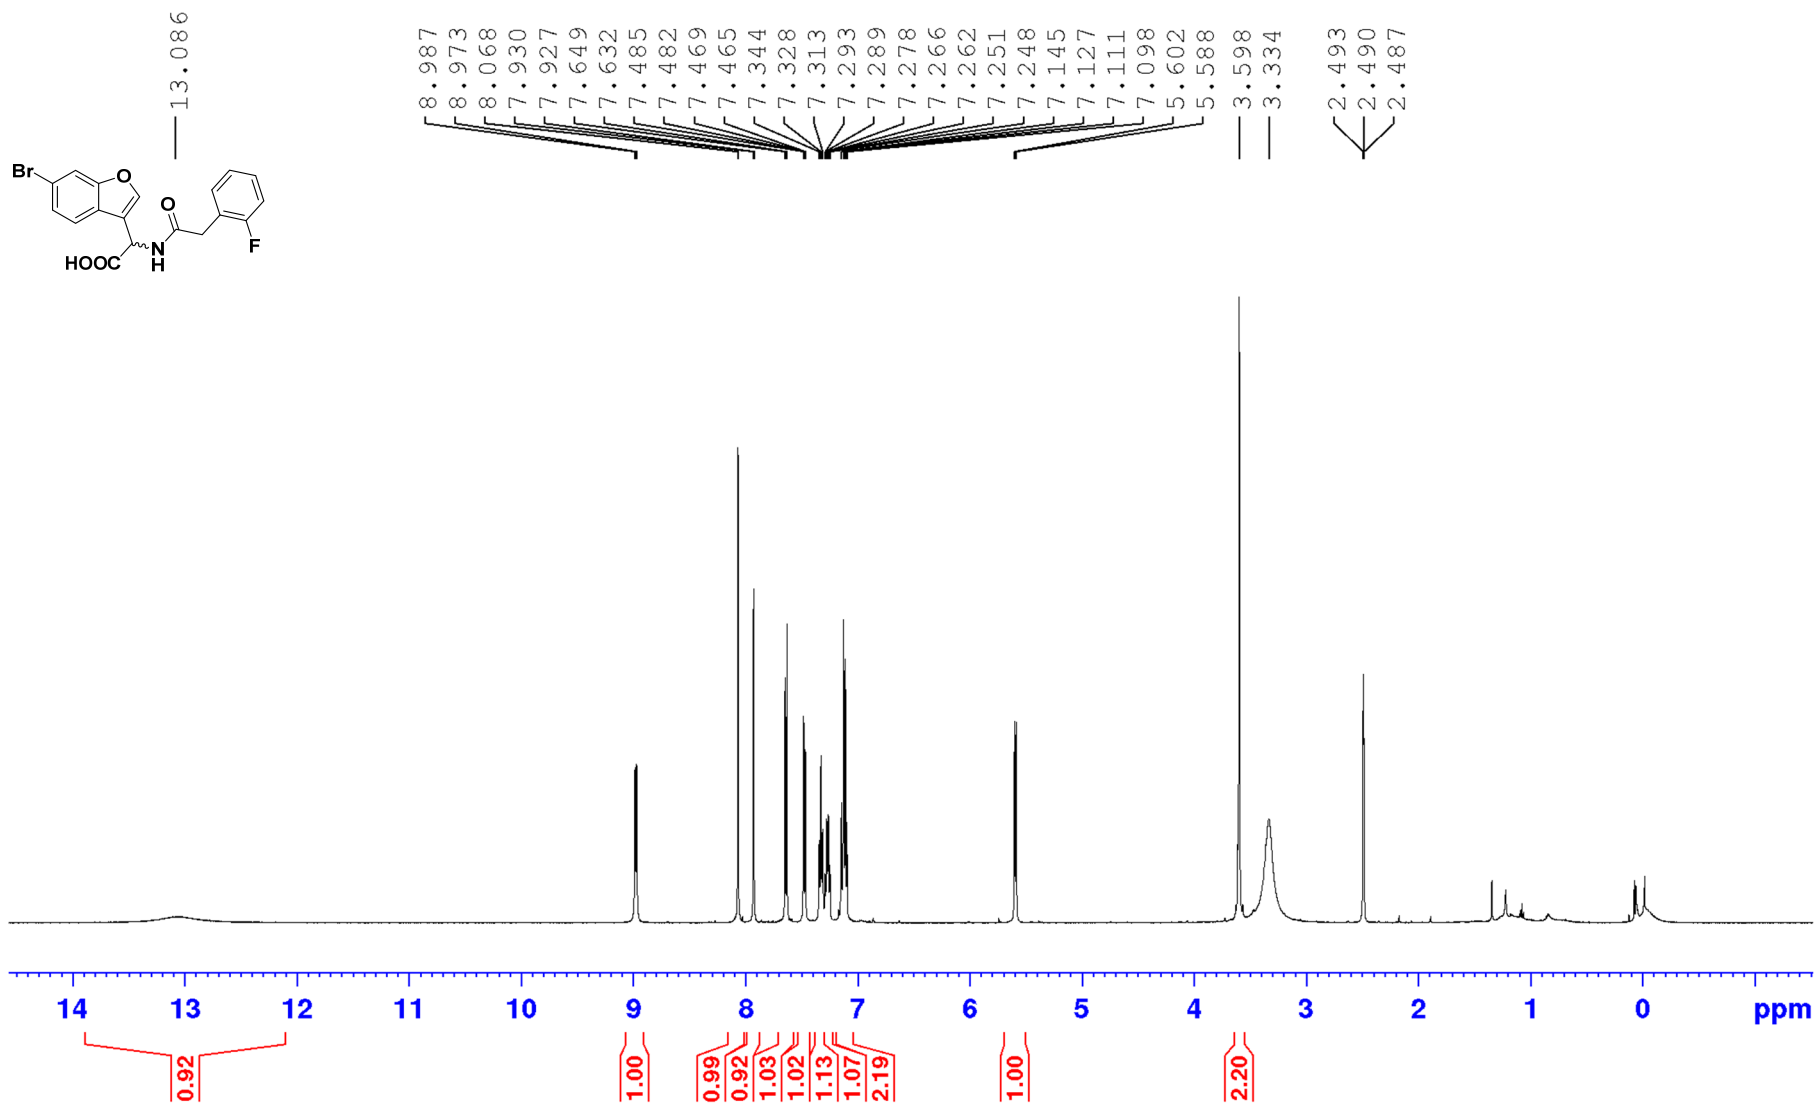

<sup>13</sup>C-NMR (125 MHz, DMSO-d<sub>6</sub>) of 2-(6-Bromobenzofuran-3-yl)-2-(2-(2-fluorophenyl)acetamido)acetic acid, 49

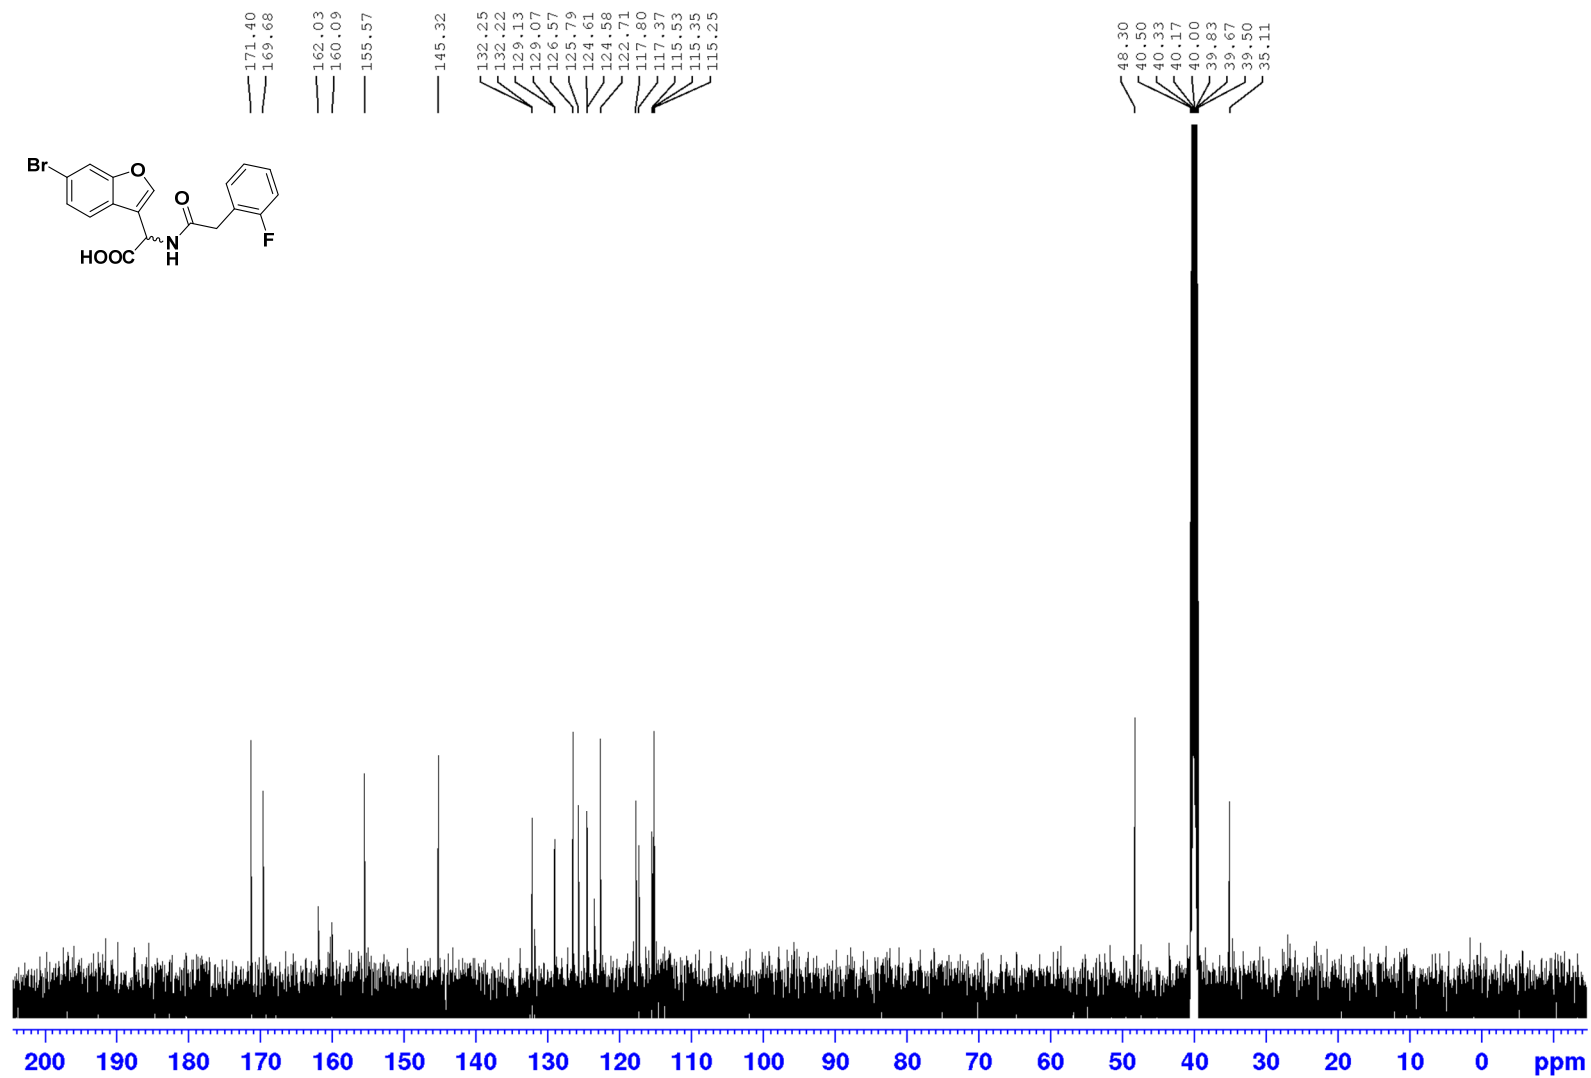

<sup>1</sup>H-NMR (400 MHz, DMSO-*d*<sub>6</sub>) of 2-(6-Bromobenzofuran-3-yl)-2-(methylsulfonylamido)acetic acid, 50

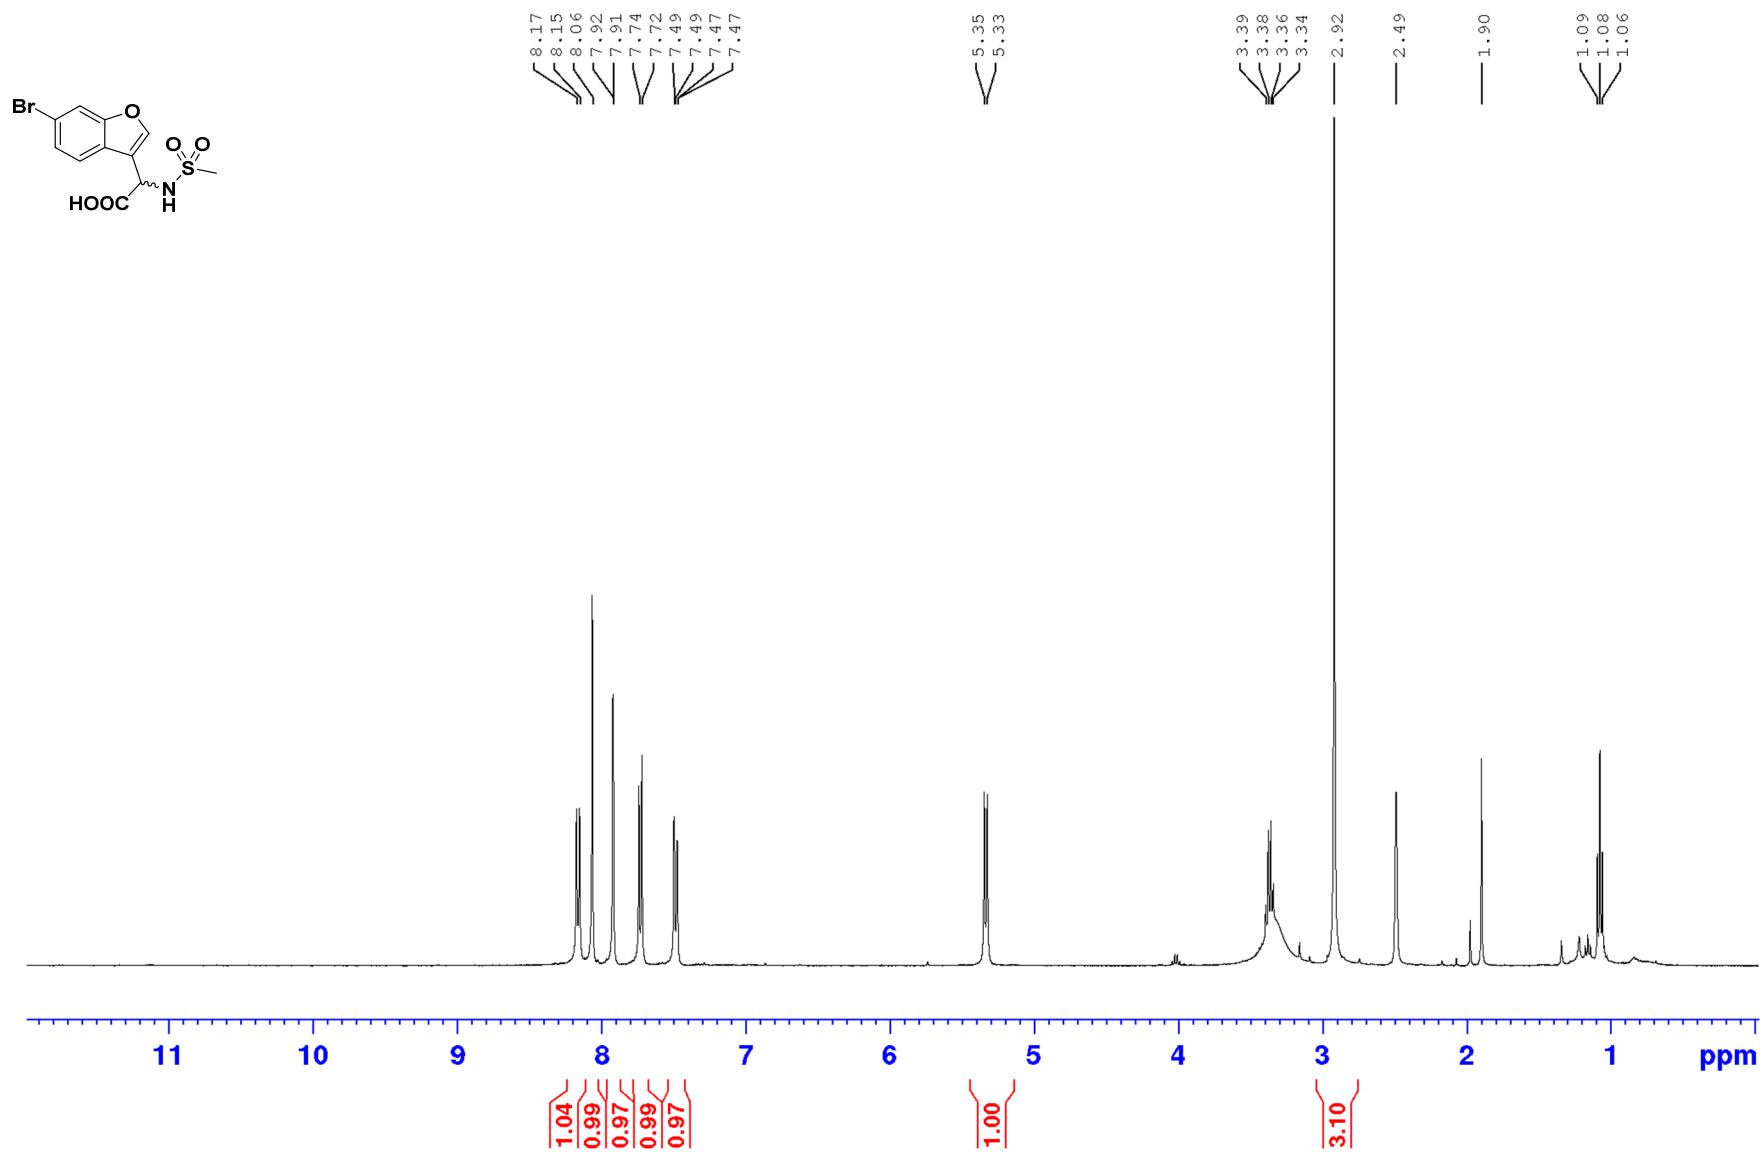

<sup>13</sup>C-NMR (100 MHz, DMSO-d<sub>6</sub>) of 2-(6-Bromobenzofuran-3-yl)-2-(methylsulfonylamido)acetic acid, 50

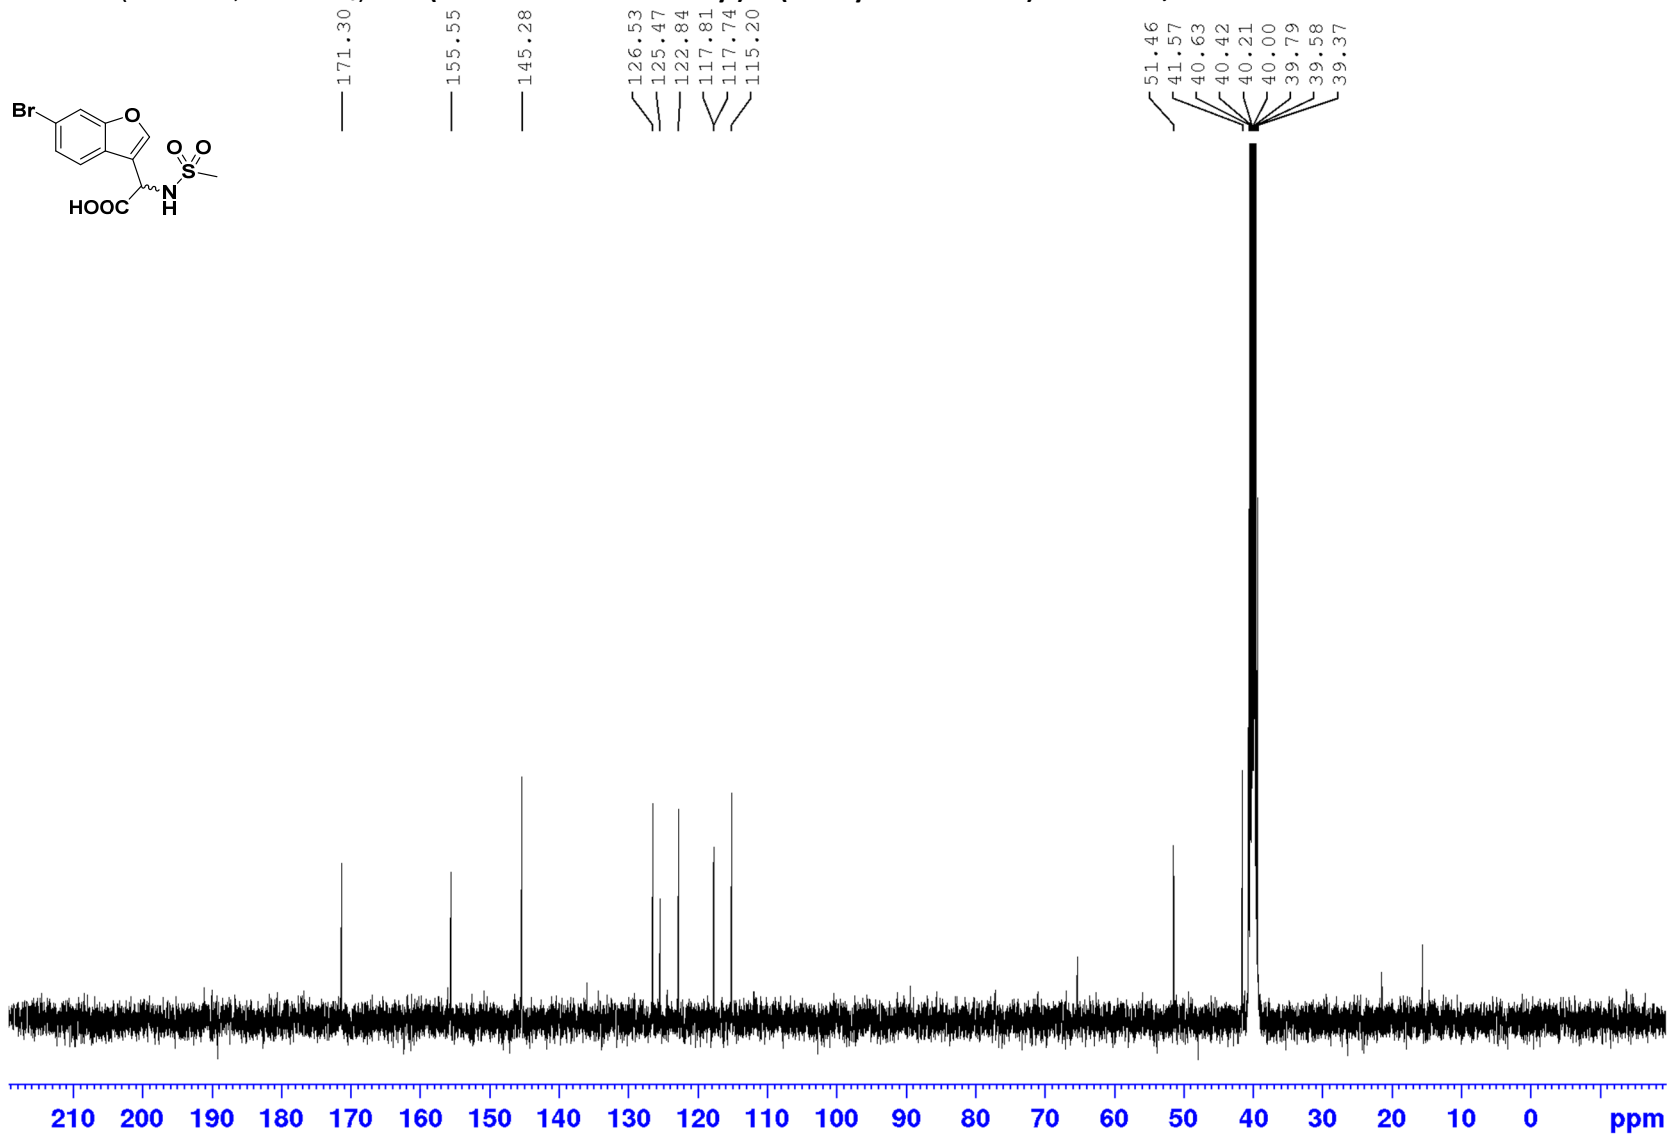



<sup>1</sup>H-NMR (500 MHz, acetone-d<sub>6</sub>) of 2-(6-Bromobenzofuran-3-yl)-2-(phenylsulfonamido)acetic acid, 51

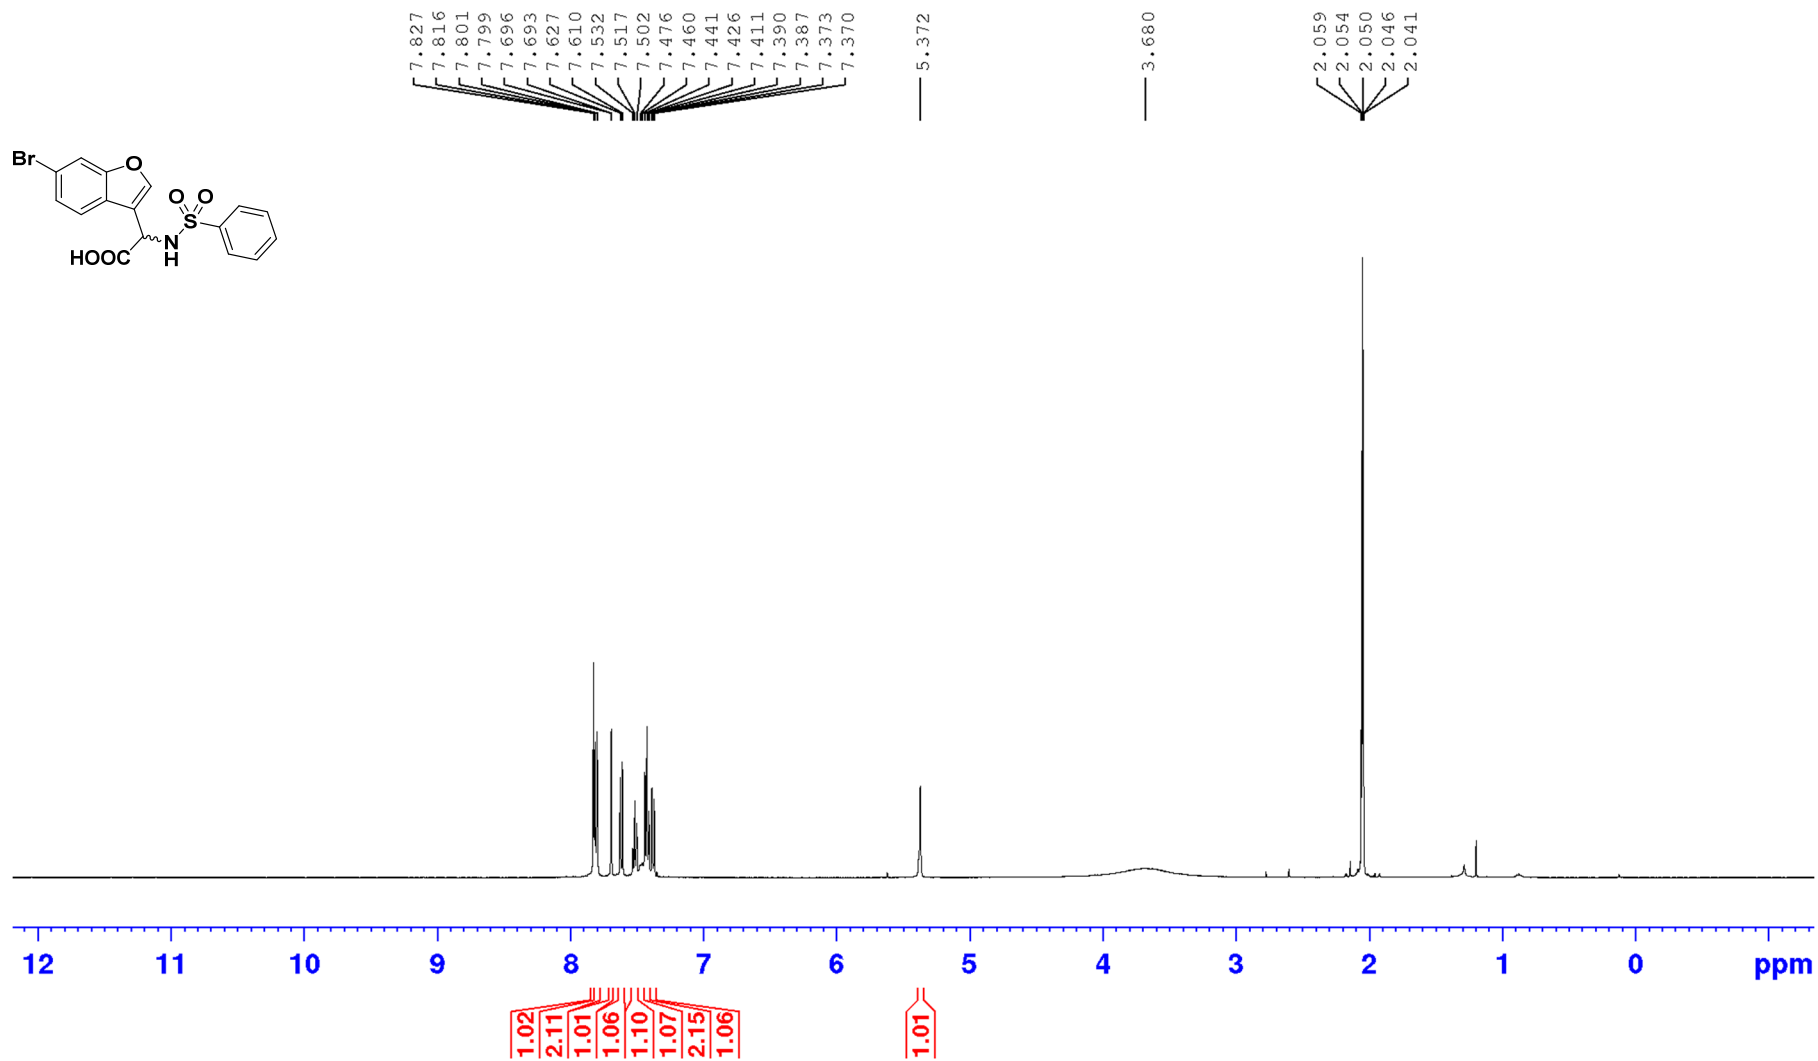

<sup>13</sup>C-NMR (125 MHz, acetone-d<sub>6</sub>) of 2-(6-Bromobenzofuran-3-yl)-2-(phenylsulfonamido)acetic acid, 51

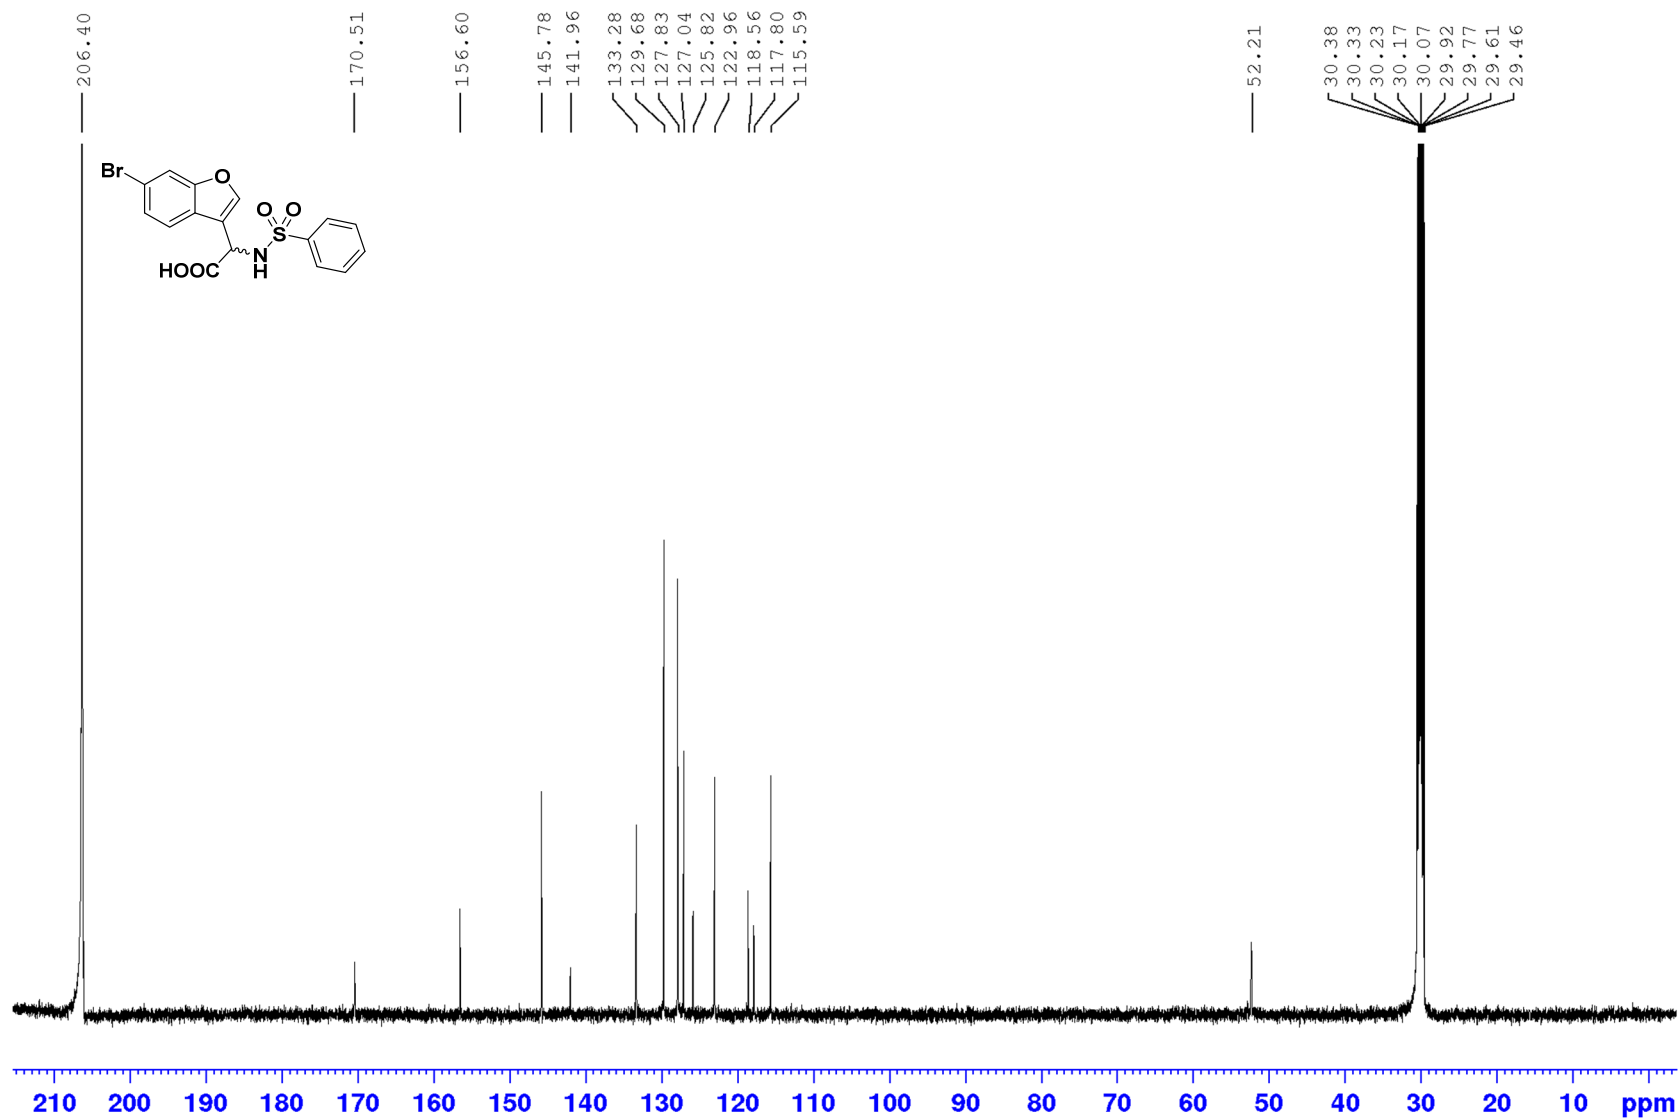

Supplement: molecules-24-03756-s001.pdf [file molecules-24-03756-s001.pdf]
